# Supplementary material
Source: publisher figshare collection journal article supplement (https://gsajournals.figshare.com/articles/dataset/_/6062972)
Supplement: Supplementary file 1 [file 1]

## Sheet: Table_S1
Table S2. Summary of maize tandem duplicates in B73 and PH207. Cluster number is a generic number given to each tandem duplicate cluster. Duplicates in B73 are from the version 4 assembly and duplicates in PH207 are from the version 1 assembly. Shared duplicates are contained in the syntenic portion of both B73 and PH207 and private duplicates are in the syntenic portion of only one genome, and n…
ClusterID	ClusterGenes	Genotype	Subgenome	Sharing	SharedWith	EstimatedAges
B73_Cluster_0000	Zm00001d000006,Zm00001d000008,Zm00001d000012,Zm00001d000017,Zm00001d000018	B73	Maize1	Shared	PH207_Cluster_1367	5.55717496048,1.01989919617,0.103188887961,11.7361955285
B73_Cluster_0001	Zm00001d000016,Zm00001d000020	B73	Maize1	Private	NA	11.7355
B73_Cluster_0002	Zm00001d000071,Zm00001d000072	B73	Nonsyntenic	NA	NA	NA
B73_Cluster_0003	Zm00001d000195,Zm00001d000196	B73	Maize1	Shared	PH207_Cluster_0940	1.28437
B73_Cluster_0004	Zm00001d000331,Zm00001d000335	B73	Nonsyntenic	NA	NA	NA
B73_Cluster_0005	Zm00001d000363,Zm00001d000365	B73	Nonsyntenic	NA	NA	NA
B73_Cluster_0006	Zm00001d000364,Zm00001d000366	B73	Nonsyntenic	NA	NA	NA
B73_Cluster_0007	Zm00001d000371,Zm00001d000373,Zm00001d000377	B73	Nonsyntenic	NA	NA	NA
B73_Cluster_0008	Zm00001d000397,Zm00001d000398	B73	Nonsyntenic	NA	NA	NA
B73_Cluster_0009	Zm00001d001817,Zm00001d001818	B73	Maize1	Private	NA	11.4555
B73_Cluster_0010	Zm00001d001833,Zm00001d001835	B73	Maize1	Private	NA	11.7326
B73_Cluster_0011	Zm00001d001885,Zm00001d001887	B73	Maize1	Private	NA	11.7468
B73_Cluster_0012	Zm00001d001902,Zm00001d001903	B73	Maize1	Shared	PH207_Cluster_0239	11.7372
B73_Cluster_0013	Zm00001d001908,Zm00001d001909	B73	Maize1	Private	NA	11.7468
B73_Cluster_0014	Zm00001d001924,Zm00001d001927	B73	Maize1	Private	NA	3.12996
B73_Cluster_0015	Zm00001d001941,Zm00001d001943,Zm00001d001944	B73	Nonsyntenic	Private	NA	3.35856329845,11.7446470855
B73_Cluster_0016	Zm00001d001961,Zm00001d001963,Zm00001d001964	B73	Maize1	Private	NA	11.7291399686,6.63444096788
B73_Cluster_0017	Zm00001d002013,Zm00001d002019,Zm00001d002020	B73	Maize1	Shared	PH207_Cluster_0243	11.7427121012,11.7427121012
B73_Cluster_0018	Zm00001d002014,Zm00001d002015,Zm00001d002016,Zm00001d002017,Zm00001d002018	B73	Maize1	Shared	PH207_Cluster_0242	11.7288234954,11.7288234954,11.7288234954,11.7288234954
B73_Cluster_0019	Zm00001d002055,Zm00001d002057	B73	Maize1	Private	NA	6.27712
B73_Cluster_0020	Zm00001d002066,Zm00001d002067	B73	Maize1	Private	NA	11.7381
B73_Cluster_0021	Zm00001d002069,Zm00001d002071,Zm00001d002072,Zm00001d002074	B73	Maize1	Private	NA	11.7227482523,11.7227482523,3.40596462792
B73_Cluster_0022	Zm00001d002093,Zm00001d002094	B73	Maize1	Shared	PH207_Cluster_0244	4.03072
B73_Cluster_0023	Zm00001d002132,Zm00001d002133	B73	Nonsyntenic	Private	NA	8.64411
B73_Cluster_0024	Zm00001d002137,Zm00001d002138	B73	Maize1	Private	NA	11.7335
B73_Cluster_0025	Zm00001d002158,Zm00001d002159,Zm00001d002160,Zm00001d002161	B73	Maize1	Private	NA	8.27523028566,8.27523028566,10.1730279314
B73_Cluster_0026	Zm00001d002168,Zm00001d002172,Zm00001d002173,Zm00001d002174,Zm00001d002178,Zm00001d002181	B73	Maize1	Private	NA	5.32243401668,8.50375268825,8.50375268825,2.95997367236,1.34182269347
B73_Cluster_0027	Zm00001d002179,Zm00001d002182	B73	Maize1	Shared	PH207_Cluster_0246	11.728
B73_Cluster_0028	Zm00001d002192,Zm00001d002193	B73	Maize1	Private	NA	0.56016
B73_Cluster_0029	Zm00001d002198,Zm00001d002199	B73	Maize1	Shared	PH207_Cluster_0245	11.7309
B73_Cluster_0030	Zm00001d002202,Zm00001d002208,Zm00001d002214,Zm00001d002221,Zm00001d002228	B73	Maize1	Private	NA	0.00013918425621,11.9142553506,11.9142553506,0.000293547087534
B73_Cluster_0031	Zm00001d002203,Zm00001d002209,Zm00001d002215,Zm00001d002223,Zm00001d002229	B73	Maize1	Shared	PH207_Cluster_0247	1.27848015908,1.27848015908,0.825838824346,1.22091631526
B73_Cluster_0032	Zm00001d002204,Zm00001d002205,Zm00001d002211,Zm00001d002216,Zm00001d002217,Zm00001d002224,Zm00001d002225,Zm00001d002230,Zm00001d002231,Zm00001d002232	B73	Maize1	Shared	PH207_Cluster_0250	3.06776829845,0.174798344921,11.7543912513,11.7543912513,3.06776829845,3.06776829845,5.20933430056,5.20933430056,0.625293864671
B73_Cluster_0033	Zm00001d002207,Zm00001d002220,Zm00001d002227	B73	Nonsyntenic	Private	NA	11.5965270242,11.2049676608
B73_Cluster_0034	Zm00001d002254,Zm00001d002255	B73	Maize1	Private	NA	11.7318
B73_Cluster_0035	Zm00001d002260,Zm00001d002261	B73	Maize1	Private	NA	11.7262
B73_Cluster_0036	Zm00001d002349,Zm00001d002350,Zm00001d002351	B73	Nonsyntenic	Shared	PH207_Cluster_0253	11.8979787087,11.8979787087
B73_Cluster_0037	Zm00001d002393,Zm00001d002394	B73	Maize1	Shared	PH207_Cluster_0254	11.7369
B73_Cluster_0038	Zm00001d002397,Zm00001d002400	B73	Nonsyntenic	NA	NA	NA
B73_Cluster_0039	Zm00001d002398,Zm00001d002401	B73	Nonsyntenic	NA	NA	NA
B73_Cluster_0040	Zm00001d002399,Zm00001d002402	B73	Maize1	Private	NA	11.7323
B73_Cluster_0041	Zm00001d002410,Zm00001d002412	B73	Maize1	Shared	PH207_Cluster_0255	7.97089
B73_Cluster_0042	Zm00001d002434,Zm00001d002435,Zm00001d002436	B73	Maize1	Shared	PH207_Cluster_0256	7.79153636043,0.730139765056
B73_Cluster_0043	Zm00001d002446,Zm00001d002447	B73	Maize1	Private	NA	11.7127
B73_Cluster_0044	Zm00001d002473,Zm00001d002474	B73	Maize1	Shared	PH207_Cluster_0257	11.7418
B73_Cluster_0045	Zm00001d002514,Zm00001d002515	B73	Maize1	Shared	PH207_Cluster_0258	2.94086
B73_Cluster_0046	Zm00001d002520,Zm00001d002521,Zm00001d002522,Zm00001d002523,Zm00001d002530	B73	Maize1	Shared	PH207_Cluster_0259	11.7297297254,11.7297297254,6.98918840338,2.53594239392
B73_Cluster_0047	Zm00001d002543,Zm00001d002546	B73	Maize1	Shared	PH207_Cluster_0260	11.7318
B73_Cluster_0048	Zm00001d002556,Zm00001d002557	B73	Maize1	Private	NA	11.8185
B73_Cluster_0049	Zm00001d002568,Zm00001d002576	B73	Maize1	Private	NA	11.7261
B73_Cluster_0050	Zm00001d002570,Zm00001d002572	B73	Maize1	Shared	PH207_Cluster_0261	0.629163
B73_Cluster_0051	Zm00001d002618,Zm00001d002620	B73	Maize1	Shared	PH207_Cluster_0262	11.8151
B73_Cluster_0052	Zm00001d002625,Zm00001d002631	B73	Maize1	Private	NA	3.83599
B73_Cluster_0053	Zm00001d002626,Zm00001d002629	B73	Maize1	Private	NA	0.00654238
B73_Cluster_0054	Zm00001d002698,Zm00001d002699	B73	Maize1	Shared	PH207_Cluster_0263	11.7268
B73_Cluster_0055	Zm00001d002705,Zm00001d002708	B73	Maize1	Shared	PH207_Cluster_0265	0.601525
B73_Cluster_0056	Zm00001d002727,Zm00001d002728,Zm00001d002729	B73	Maize1	Shared	PH207_Cluster_0266	4.34470743362,11.7299941193
B73_Cluster_0057	Zm00001d002744,Zm00001d002747,Zm00001d002748	B73	Maize1	Private	NA	11.73187158,9.20499842702
B73_Cluster_0058	Zm00001d002760,Zm00001d002761,Zm00001d002762	B73	Nonsyntenic	Private	NA	0.00143094393259,11.8726226994
B73_Cluster_0059	Zm00001d002772,Zm00001d002773	B73	Maize1	Shared	PH207_Cluster_0268	0.0018621
B73_Cluster_0060	Zm00001d002812,Zm00001d002814	B73	Maize1	Private	NA	11.7327
B73_Cluster_0061	Zm00001d002847,Zm00001d002848	B73	Maize1	Shared	PH207_Cluster_0270	10.7321
B73_Cluster_0062	Zm00001d002886,Zm00001d002887	B73	Nonsyntenic	Private	NA	0.0293785
B73_Cluster_0063	Zm00001d002888,Zm00001d002893	B73	Maize1	Private	NA	0.109877
B73_Cluster_0064	Zm00001d002897,Zm00001d002898,Zm00001d002899,Zm00001d002901,Zm00001d002902	B73	Maize1	Private	NA	3.51994348288,6.63483747169,6.93256153378,6.93256153378
B73_Cluster_0065	Zm00001d002907,Zm00001d002915	B73	Nonsyntenic	Private	NA	11.7016
B73_Cluster_0066	Zm00001d002912,Zm00001d002916	B73	Nonsyntenic	NA	NA	NA
B73_Cluster_0067	Zm00001d002958,Zm00001d002959	B73	Maize1	Shared	PH207_Cluster_0276	11.309
B73_Cluster_0068	Zm00001d002972,Zm00001d002974	B73	Maize1	Shared	PH207_Cluster_0277	9.32116
B73_Cluster_0069	Zm00001d003015,Zm00001d003016	B73	Maize1	Shared	PH207_Cluster_0279	5.73722
B73_Cluster_0070	Zm00001d003019,Zm00001d003021,Zm00001d003023	B73	Maize1	Private	NA	4.75826703622,0.0611305142521
B73_Cluster_0071	Zm00001d003020,Zm00001d003022,Zm00001d003024	B73	Maize1	Private	NA	11.728183912,11.516684415
B73_Cluster_0072	Zm00001d003044,Zm00001d003045,Zm00001d003046	B73	Maize1	Private	NA	11.7213975741,11.7213975741
B73_Cluster_0073	Zm00001d003058,Zm00001d003059	B73	Maize1	Shared	PH207_Cluster_0281	10.2735
B73_Cluster_0074	Zm00001d003066,Zm00001d003067	B73	Maize1	Shared	PH207_Cluster_0282	0.787851
B73_Cluster_0075	Zm00001d003069,Zm00001d003070	B73	Nonsyntenic	Private	NA	11.7429
B73_Cluster_0076	Zm00001d003140,Zm00001d003142,Zm00001d003144	B73	Maize1	Shared	PH207_Cluster_0283	11.7409324976,0.062902895259
B73_Cluster_0077	Zm00001d003151,Zm00001d003155	B73	Maize1	Private	NA	0.126968
B73_Cluster_0078	Zm00001d003173,Zm00001d003174	B73	Maize1	Private	NA	0.354165
B73_Cluster_0079	Zm00001d003183,Zm00001d003184,Zm00001d003185,Zm00001d003186,Zm00001d003187	B73	Maize1	Shared	PH207_Cluster_0284	10.7771138696,10.7771138696,9.62753953811,11.7159910762
B73_Cluster_0080	Zm00001d003188,Zm00001d003190,Zm00001d003191	B73	Maize1	Private	NA	11.7524093524,8.3407731365
B73_Cluster_0081	Zm00001d003217,Zm00001d003219	B73	Maize1	Private	NA	4.10979
B73_Cluster_0082	Zm00001d003232,Zm00001d003234,Zm00001d003235,Zm00001d003237,Zm00001d003240	B73	Nonsyntenic	Private	NA	11.7389336765,11.7389336765,0.565534396761,0.10322774295
B73_Cluster_0083	Zm00001d003277,Zm00001d003280	B73	Maize1	Private	NA	11.714
B73_Cluster_0084	Zm00001d003294,Zm00001d003295	B73	Maize1	Private	NA	11.7818
B73_Cluster_0085	Zm00001d003304,Zm00001d003306	B73	Nonsyntenic	Private	NA	0.0150275
B73_Cluster_0086	Zm00001d003341,Zm00001d003342	B73	Maize1	Private	NA	6.59464
B73_Cluster_0087	Zm00001d003353,Zm00001d003355,Zm00001d003356,Zm00001d003357,Zm00001d003358,Zm00001d003363,Zm00001d003364,Zm00001d003365	B73	Maize1	Private	NA	11.7201770371,2.32820093843,11.7201770371,11.7201770371,1.10877396933,1.4484224781,3.58108984673
B73_Cluster_0088	Zm00001d003396,Zm00001d003397	B73	Maize1	Private	NA	1.55305
B73_Cluster_0089	Zm00001d003432,Zm00001d003434,Zm00001d003436	B73	Maize1	Shared	PH207_Cluster_0286	11.7183860049,3.1571507384
B73_Cluster_0090	Zm00001d003468,Zm00001d003469,Zm00001d003471,Zm00001d003473	B73	Maize1	Shared	PH207_Cluster_0287	11.7335970578,8.00028566096,2.73162842363
B73_Cluster_0091	Zm00001d003482,Zm00001d003485	B73	Maize1	Private	NA	11.8029
B73_Cluster_0092	Zm00001d003483,Zm00001d003488	B73	Maize1	Shared	PH207_Cluster_0288	11.7205
B73_Cluster_0093	Zm00001d003497,Zm00001d003499	B73	Maize1	Private	NA	11.7138
B73_Cluster_0094	Zm00001d003501,Zm00001d003504	B73	Maize1	Shared	PH207_Cluster_0289	4.72436
B73_Cluster_0095	Zm00001d003524,Zm00001d003525	B73	Maize1	Shared	PH207_Cluster_0291	0.0142485
B73_Cluster_0096	Zm00001d003566,Zm00001d003567	B73	Maize1	Shared	PH207_Cluster_0292	3.70897
B73_Cluster_0097	Zm00001d003605,Zm00001d003606,Zm00001d003607	B73	Maize1	Shared	PH207_Cluster_0294	11.7087188259,1.00762147531
B73_Cluster_0098	Zm00001d003661,Zm00001d003662	B73	Maize1	Private	NA	5.20297
B73_Cluster_0099	Zm00001d003680,Zm00001d003683	B73	Nonsyntenic	Shared	PH207_Cluster_0295	6.45713
B73_Cluster_0100	Zm00001d003695,Zm00001d003696,Zm00001d003699,Zm00001d003701	B73	Nonsyntenic	Shared	PH207_Cluster_0296	1.8376713491,10.2505313341,11.7322065563
B73_Cluster_0101	Zm00001d003719,Zm00001d003722	B73	Maize1	Shared	PH207_Cluster_0297	11.7184
B73_Cluster_0102	Zm00001d003757,Zm00001d003760	B73	Maize1	Shared	PH207_Cluster_0300	11.7569
B73_Cluster_0103	Zm00001d003782,Zm00001d003783	B73	Nonsyntenic	Private	NA	11.8217
B73_Cluster_0104	Zm00001d003786,Zm00001d003791,Zm00001d003794	B73	Maize1	Private	NA	4.94819133896,9.31464614711
B73_Cluster_0105	Zm00001d003850,Zm00001d003852	B73	Maize1	Private	NA	2.43852
B73_Cluster_0106	Zm00001d003859,Zm00001d003861	B73	Maize1	Shared	PH207_Cluster_0303	11.7144
B73_Cluster_0107	Zm00001d003866,Zm00001d003867	B73	Maize1	Private	NA	11.7357
B73_Cluster_0108	Zm00001d003939,Zm00001d003941	B73	Maize1	Shared	PH207_Cluster_0305	11.7132
B73_Cluster_0109	Zm00001d003949,Zm00001d003950,Zm00001d003954	B73	Maize1	Shared	PH207_Cluster_0306	11.723998683,11.2729143964
B73_Cluster_0110	Zm00001d003961,Zm00001d003962	B73	Maize1	Shared	PH207_Cluster_0307	11.7071
B73_Cluster_0111	Zm00001d004025,Zm00001d004033	B73	Maize1	Shared	PH207_Cluster_0309	11.8333
B73_Cluster_0112	Zm00001d004183,Zm00001d004184	B73	Nonsyntenic	NA	NA	NA
B73_Cluster_0113	Zm00001d004230,Zm00001d004234	B73	Nonsyntenic	Private	PH207_Cluster_0313	11.8172
B73_Cluster_0114	Zm00001d004231,Zm00001d004232	B73	Nonsyntenic	Private	NA	11.7217
B73_Cluster_0115	Zm00001d004301,Zm00001d004305,Zm00001d004306,Zm00001d004308	B73	Maize1	Shared	PH207_Cluster_0315	11.7241272319,11.7241272319,2.37361399585
B73_Cluster_0116	Zm00001d004322,Zm00001d004326	B73	Maize1	Private	NA	11.7812
B73_Cluster_0117	Zm00001d004328,Zm00001d004331	B73	Maize1	Private	NA	11.8102
B73_Cluster_0118	Zm00001d004344,Zm00001d004346	B73	Nonsyntenic	Shared	PH207_Cluster_0316	0.00184854
B73_Cluster_0119	Zm00001d004355,Zm00001d004364,Zm00001d004371	B73	Maize1	Shared	PH207_Cluster_0317	0.713951288458,11.7028712727
B73_Cluster_0120	Zm00001d004387,Zm00001d004389	B73	Maize1	Shared	PH207_Cluster_0319	11.7329
B73_Cluster_0121	Zm00001d004414,Zm00001d004417	B73	Maize1	Shared	PH207_Cluster_0320	11.7494
B73_Cluster_0122	Zm00001d004415,Zm00001d004418	B73	Nonsyntenic	Private	NA	11.3833
B73_Cluster_0123	Zm00001d004423,Zm00001d004424	B73	Nonsyntenic	Shared	PH207_Cluster_0321	11.7321
B73_Cluster_0124	Zm00001d004435,Zm00001d004436	B73	Nonsyntenic	Shared	PH207_Cluster_0322	11.7842
B73_Cluster_0125	Zm00001d004491,Zm00001d004503	B73	Nonsyntenic	Private	PH207_Cluster_0323	9.43671
B73_Cluster_0126	Zm00001d004507,Zm00001d004508	B73	Nonsyntenic	NA	NA	NA
B73_Cluster_0127	Zm00001d004526,Zm00001d004527	B73	Nonsyntenic	Private	NA	11.7184
B73_Cluster_0128	Zm00001d004572,Zm00001d004589	B73	Nonsyntenic	Private	NA	11.7413
B73_Cluster_0129	Zm00001d004582,Zm00001d004583	B73	Nonsyntenic	NA	NA	NA
B73_Cluster_0130	Zm00001d004676,Zm00001d004677	B73	Nonsyntenic	Private	NA	11.7126
B73_Cluster_0131	Zm00001d004684,Zm00001d004685,Zm00001d004686	B73	Nonsyntenic	NA	NA	NA
B73_Cluster_0132	Zm00001d004687,Zm00001d004689	B73	Nonsyntenic	Shared	PH207_Cluster_0326	11.752
B73_Cluster_0133	Zm00001d004718,Zm00001d004719	B73	Maize2	Private	NA	0.00371803
B73_Cluster_0134	Zm00001d004721,Zm00001d004725,Zm00001d004728,Zm00001d004729,Zm00001d004730	B73	Maize2	Shared	PH207_Cluster_0327	6.46655039321,8.86922308196,11.7174776108,5.48648586937
B73_Cluster_0135	Zm00001d004753,Zm00001d004754,Zm00001d004758	B73	Maize2	Shared	PH207_Cluster_0328	11.7238750133,6.49468153087
B73_Cluster_0136	Zm00001d004763,Zm00001d004768	B73	Nonsyntenic	Shared	PH207_Cluster_0329	11.8986
B73_Cluster_0137	Zm00001d004771,Zm00001d004772	B73	Nonsyntenic	Shared	PH207_Cluster_0330	0.266037
B73_Cluster_0138	Zm00001d004794,Zm00001d004796,Zm00001d004797	B73	Nonsyntenic	NA	NA	NA
B73_Cluster_0139	Zm00001d004826,Zm00001d004835	B73	Nonsyntenic	NA	NA	NA
B73_Cluster_0140	Zm00001d004839,Zm00001d004841	B73	Maize2	Shared	PH207_Cluster_0331	11.7572
B73_Cluster_0141	Zm00001d004884,Zm00001d004887,Zm00001d004888	B73	Nonsyntenic	Shared	PH207_Cluster_0332	11.9282682697,11.9282682697
B73_Cluster_0142	Zm00001d004942,Zm00001d004945,Zm00001d004949	B73	Maize2	Private	NA	4.07143308791,0.340284622918
B73_Cluster_0143	Zm00001d004977,Zm00001d004978	B73	Maize2	Shared	PH207_Cluster_0333	11.7354
B73_Cluster_0144	Zm00001d004994,Zm00001d004995	B73	Maize2	Private	NA	11.7229
B73_Cluster_0145	Zm00001d005001,Zm00001d005002	B73	Maize2	Shared	PH207_Cluster_0334	1.07381
B73_Cluster_0146	Zm00001d005012,Zm00001d005013	B73	Maize2	Private	NA	11.7161
B73_Cluster_0147	Zm00001d005038,Zm00001d005039	B73	Maize2	Private	NA	10.4299
B73_Cluster_0148	Zm00001d005043,Zm00001d005044	B73	Nonsyntenic	NA	NA	NA
B73_Cluster_0149	Zm00001d005075,Zm00001d005076,Zm00001d005077	B73	Nonsyntenic	Private	NA	2.13673923985,2.13673923985
B73_Cluster_0150	Zm00001d005189,Zm00001d005190	B73	Maize2	Shared	PH207_Cluster_0336	11.7176
B73_Cluster_0151	Zm00001d005283,Zm00001d005284	B73	Maize2	Private	NA	7.8352
B73_Cluster_0152	Zm00001d005300,Zm00001d005307	B73	Maize2	Private	NA	11.7384
B73_Cluster_0153	Zm00001d005374,Zm00001d005379,Zm00001d005380,Zm00001d005389	B73	Maize2	Shared	PH207_Cluster_0339	2.13003428364,0.141687673731,2.13003428364
B73_Cluster_0154	Zm00001d005375,Zm00001d005381,Zm00001d005391	B73	Maize2	Shared	PH207_Cluster_0340	0.0107712048236,11.8243099931
B73_Cluster_0155	Zm00001d005377,Zm00001d005378,Zm00001d005383,Zm00001d005392	B73	Maize2	Shared	PH207_Cluster_0342	0.232094024925,11.722234822,0.1341213678
B73_Cluster_0156	Zm00001d005410,Zm00001d005421	B73	Maize2	Shared	PH207_Cluster_0343	1.41096
B73_Cluster_0157	Zm00001d005436,Zm00001d005437	B73	Maize2	Shared	PH207_Cluster_0344	11.7479
B73_Cluster_0158	Zm00001d005464,Zm00001d005465	B73	Maize2	Private	NA	11.7327
B73_Cluster_0159	Zm00001d005540,Zm00001d005541	B73	Nonsyntenic	Private	NA	11.7625
B73_Cluster_0160	Zm00001d005678,Zm00001d005680	B73	Maize2	Shared	PH207_Cluster_0347	11.8271
B73_Cluster_0161	Zm00001d005688,Zm00001d005690	B73	Maize2	Shared	PH207_Cluster_0348	5.60524
B73_Cluster_0162	Zm00001d005693,Zm00001d005694	B73	Maize2	Private	NA	11.7424
B73_Cluster_0163	Zm00001d005716,Zm00001d005717,Zm00001d005719,Zm00001d005722	B73	Maize2	Shared	PH207_Cluster_0350	11.7251853992,5.46221079133,3.39139498618
B73_Cluster_0164	Zm00001d005782,Zm00001d005783	B73	Maize2	Shared	PH207_Cluster_0352	7.92378
B73_Cluster_0165	Zm00001d005786,Zm00001d005787,Zm00001d005788	B73	Maize2	Shared	PH207_Cluster_0354	1.18619603069,7.91161988954
B73_Cluster_0166	Zm00001d005802,Zm00001d005803	B73	Maize2	Shared	PH207_Cluster_0355	11.7266
B73_Cluster_0167	Zm00001d005821,Zm00001d005822,Zm00001d005823	B73	Maize2	Shared	PH207_Cluster_0356	11.7186797068,11.7186797068
B73_Cluster_0168	Zm00001d005859,Zm00001d005860	B73	Maize2	Shared	PH207_Cluster_0357	11.7105
B73_Cluster_0169	Zm00001d005878,Zm00001d005879	B73	Maize2	Private	NA	11.7944
B73_Cluster_0170	Zm00001d005905,Zm00001d005909,Zm00001d005910	B73	Maize2	Shared	PH207_Cluster_0358	5.99101600309,11.731093532
B73_Cluster_0171	Zm00001d005933,Zm00001d005934,Zm00001d005935	B73	Maize2	Private	NA	8.18888927545,8.18888927545
B73_Cluster_0172	Zm00001d005936,Zm00001d005940	B73	Maize2	Private	NA	11.7346
B73_Cluster_0173	Zm00001d005973,Zm00001d005974	B73	Maize2	Shared	PH207_Cluster_0361	11.7238
B73_Cluster_0174	Zm00001d006013,Zm00001d006014	B73	Maize2	Private	NA	3.68417
B73_Cluster_0175	Zm00001d006137,Zm00001d006140,Zm00001d006145	B73	Maize2	Shared	PH207_Cluster_0362	11.7610634717,0.000941064391219
B73_Cluster_0176	Zm00001d006142,Zm00001d006147	B73	Maize2	Private	NA	0.0232452
B73_Cluster_0177	Zm00001d006143,Zm00001d006148	B73	Maize2	Private	NA	5.54768
B73_Cluster_0178	Zm00001d006144,Zm00001d006149	B73	Maize2	Shared	PH207_Cluster_0363	0.0844525
B73_Cluster_0179	Zm00001d006169,Zm00001d006170	B73	Maize2	Private	NA	6.0584
B73_Cluster_0180	Zm00001d006193,Zm00001d006199,Zm00001d006203	B73	Maize2	Shared	PH207_Cluster_0364	9.27756165642,5.21735500519
B73_Cluster_0181	Zm00001d006252,Zm00001d006253	B73	Nonsyntenic	NA	NA	NA
B73_Cluster_0182	Zm00001d006260,Zm00001d006263	B73	Maize2	Shared	PH207_Cluster_0365	11.7098
B73_Cluster_0183	Zm00001d006274,Zm00001d006275,Zm00001d006276,Zm00001d006277,Zm00001d006279,Zm00001d006280,Zm00001d006282,Zm00001d006283,Zm00001d006285	B73	Nonsyntenic	Shared	PH207_Cluster_0366	11.8714953962,0.00459532598074,0.00459532598074,0.00459532598074,0.00459532598074,0.00459532598074,0.00117257106103,0.00117257106103
B73_Cluster_0184	Zm00001d006278,Zm00001d006281	B73	Maize2	Private	NA	2.17308
B73_Cluster_0185	Zm00001d006298,Zm00001d006306	B73	Maize2	Private	NA	0.0127445
B73_Cluster_0186	Zm00001d006300,Zm00001d006301,Zm00001d006307	B73	Maize2	Private	NA	0.539231678252,0.664930689983
B73_Cluster_0187	Zm00001d006312,Zm00001d006313	B73	Maize2	Private	NA	1.0824
B73_Cluster_0188	Zm00001d006340,Zm00001d006341,Zm00001d006342	B73	Maize2	Shared	PH207_Cluster_0369	11.7392710883,9.58622155423
B73_Cluster_0189	Zm00001d006446,Zm00001d006449,Zm00001d006450	B73	Maize2	Shared	PH207_Cluster_0370	11.4065467262,11.733529131
B73_Cluster_0190	Zm00001d006484,Zm00001d006485	B73	Nonsyntenic	NA	NA	NA
B73_Cluster_0191	Zm00001d006493,Zm00001d006494	B73	Maize2	Shared	PH207_Cluster_0371	1.53779
B73_Cluster_0192	Zm00001d006505,Zm00001d006506	B73	Maize2	Private	NA	6.80215
B73_Cluster_0193	Zm00001d006515,Zm00001d006516	B73	Maize2	Shared	PH207_Cluster_0372	11.7401
B73_Cluster_0194	Zm00001d006525,Zm00001d006526	B73	Maize2	Shared	PH207_Cluster_0373	11.7248
B73_Cluster_0195	Zm00001d006527,Zm00001d006531,Zm00001d006535,Zm00001d006536	B73	Maize2	Private	NA	3.18448939334,9.06972330504,9.06972330504
B73_Cluster_0196	Zm00001d006547,Zm00001d006548	B73	Maize2	Shared	PH207_Cluster_0375	2.14505
B73_Cluster_0197	Zm00001d006683,Zm00001d006684	B73	Nonsyntenic	Shared	PH207_Cluster_0379	11.731
B73_Cluster_0198	Zm00001d006688,Zm00001d006697	B73	Nonsyntenic	Shared	PH207_Cluster_0380	11.9101
B73_Cluster_0199	Zm00001d006735,Zm00001d006736	B73	Nonsyntenic	NA	NA	NA
B73_Cluster_0200	Zm00001d006774,Zm00001d006775	B73	Maize2	Shared	PH207_Cluster_0383	6.59307
B73_Cluster_0201	Zm00001d006776,Zm00001d006777	B73	Maize2	Private	NA	0.736769
B73_Cluster_0202	Zm00001d006778,Zm00001d006779	B73	Maize2	Private	NA	0.390616
B73_Cluster_0203	Zm00001d006923,Zm00001d006924	B73	Maize2	Private	NA	0.939373
B73_Cluster_0204	Zm00001d006933,Zm00001d006936,Zm00001d006937	B73	Maize2	Shared	PH207_Cluster_0384	1.50017595366,0.000167333154088
B73_Cluster_0205	Zm00001d006947,Zm00001d006948	B73	Maize2	Shared	PH207_Cluster_0385	0.25515
B73_Cluster_0206	Zm00001d007125,Zm00001d007127,Zm00001d007129	B73	Maize2	Shared	PH207_Cluster_0387	11.725672799,0.200429502648
B73_Cluster_0207	Zm00001d007160,Zm00001d007161	B73	Maize2	Private	NA	8.76673
B73_Cluster_0208	Zm00001d007166,Zm00001d007167	B73	Maize2	Shared	PH207_Cluster_0388	11.7439
B73_Cluster_0209	Zm00001d007257,Zm00001d007258	B73	Maize2	Shared	PH207_Cluster_0389	11.7302
B73_Cluster_0210	Zm00001d007272,Zm00001d007274	B73	Maize2	Private	NA	11.7317
B73_Cluster_0211	Zm00001d007334,Zm00001d007337	B73	Maize2	Private	NA	11.7301
B73_Cluster_0212	Zm00001d007341,Zm00001d007343	B73	Maize2	Shared	PH207_Cluster_0391	11.7148
B73_Cluster_0213	Zm00001d007347,Zm00001d007349	B73	Maize2	Shared	PH207_Cluster_0392	7.38797
B73_Cluster_0214	Zm00001d007367,Zm00001d007368	B73	Maize2	Shared	PH207_Cluster_0393	4.40902
B73_Cluster_0215	Zm00001d007400,Zm00001d007403	B73	Maize2	Shared	PH207_Cluster_0394	9.83172
B73_Cluster_0216	Zm00001d007426,Zm00001d007430	B73	Nonsyntenic	NA	NA	NA
B73_Cluster_0217	Zm00001d007443,Zm00001d007444	B73	Nonsyntenic	Private	NA	8.62631
B73_Cluster_0218	Zm00001d007456,Zm00001d007457	B73	Maize2	Shared	PH207_Cluster_0397	2.84925
B73_Cluster_0219	Zm00001d007470,Zm00001d007471	B73	Maize2	Private	NA	3.38527
B73_Cluster_0220	Zm00001d007474,Zm00001d007477	B73	Maize2	Shared	PH207_Cluster_0398	0.0880231
B73_Cluster_0221	Zm00001d007491,Zm00001d007495	B73	Nonsyntenic	Shared	PH207_Cluster_0400	11.7237
B73_Cluster_0222	Zm00001d007492,Zm00001d007493	B73	Nonsyntenic	NA	NA	NA
B73_Cluster_0223	Zm00001d007531,Zm00001d007534,Zm00001d007548,Zm00001d007555,Zm00001d007559	B73	Maize2	Shared	PH207_Cluster_0401	1.49064472175,3.22885324576,4.44584038098,4.44584038098
B73_Cluster_0224	Zm00001d007549,Zm00001d007560	B73	Maize2	Private	NA	0.00670032
B73_Cluster_0225	Zm00001d007550,Zm00001d007561	B73	Nonsyntenic	Private	NA	4.25152
B73_Cluster_0226	Zm00001d007553,Zm00001d007567	B73	Maize2	Shared	PH207_Cluster_0402	6.17045
B73_Cluster_0227	Zm00001d007586,Zm00001d007587,Zm00001d007589,Zm00001d007590	B73	Nonsyntenic	Shared	PH207_Cluster_0403	11.7265074114,11.7265074114,1.55035909104
B73_Cluster_0228	Zm00001d007602,Zm00001d007603	B73	Maize2	Shared	PH207_Cluster_0404	11.7242
B73_Cluster_0229	Zm00001d007604,Zm00001d007616,Zm00001d007618,Zm00001d007620,Zm00001d007623	B73	Maize2	Private	NA	0.0561005966221,0.0002401475738,0.0561005966221,0.000131948400827
B73_Cluster_0230	Zm00001d007632,Zm00001d007635	B73	Maize2	Shared	PH207_Cluster_0405	10.1742
B73_Cluster_0231	Zm00001d007661,Zm00001d007665,Zm00001d007667,Zm00001d007670,Zm00001d007672,Zm00001d007675	B73	Maize2	Shared	PH207_Cluster_0407	0.781011866842,0.376436986698,0.100534185669,0.324199736647,0.324199736647
B73_Cluster_0232	Zm00001d007662,Zm00001d007664	B73	Nonsyntenic	NA	NA	NA
B73_Cluster_0233	Zm00001d007700,Zm00001d007705	B73	Nonsyntenic	Shared	PH207_Cluster_0410	11.7898
B73_Cluster_0234	Zm00001d007725,Zm00001d007743	B73	Nonsyntenic	Private	PH207_Cluster_0413	11.7645
B73_Cluster_0235	Zm00001d007726,Zm00001d007732,Zm00001d007740,Zm00001d007746	B73	Nonsyntenic	Shared	PH207_Cluster_0414	1.65720168425,11.7347483356,11.7347483356
B73_Cluster_0236	Zm00001d007755,Zm00001d007757	B73	Maize2	Shared	PH207_Cluster_0416	5.877
B73_Cluster_0237	Zm00001d007762,Zm00001d007764	B73	Maize2	Shared	PH207_Cluster_0417	11.7377
B73_Cluster_0238	Zm00001d007777,Zm00001d007782	B73	Nonsyntenic	Shared	PH207_Cluster_0418	11.8973
B73_Cluster_0239	Zm00001d007790,Zm00001d007793	B73	Maize2	Private	NA	0.280893
B73_Cluster_0240	Zm00001d007810,Zm00001d007815,Zm00001d007819	B73	Maize2	Shared	PH207_Cluster_0420	6.70522737705,6.70522737705
B73_Cluster_0241	Zm00001d007831,Zm00001d007832	B73	Maize2	Shared	PH207_Cluster_0421	11.7279
B73_Cluster_0242	Zm00001d007843,Zm00001d007848	B73	Nonsyntenic	Private	NA	11.7301
B73_Cluster_0243	Zm00001d007851,Zm00001d007853	B73	Nonsyntenic	Shared	PH207_Cluster_0427	11.7425
B73_Cluster_0244	Zm00001d007908,Zm00001d007909	B73	Maize2	Shared	PH207_Cluster_0425	11.7284
B73_Cluster_0245	Zm00001d007918,Zm00001d007924	B73	Maize2	Private	NA	11.7432
B73_Cluster_0246	Zm00001d008260,Zm00001d008261	B73	Maize2	Private	NA	0.151118
B73_Cluster_0247	Zm00001d008299,Zm00001d008300	B73	Maize2	Shared	PH207_Cluster_1110	5.16393
B73_Cluster_0248	Zm00001d008314,Zm00001d008318	B73	Maize2	Private	NA	3.49545
B73_Cluster_0249	Zm00001d008322,Zm00001d008323	B73	Maize2	Shared	PH207_Cluster_1111	8.2619
B73_Cluster_0250	Zm00001d008331,Zm00001d008332	B73	Maize2	Shared	PH207_Cluster_1112	0.980864
B73_Cluster_0251	Zm00001d008399,Zm00001d008403	B73	Maize2	Private	NA	11.8106
B73_Cluster_0252	Zm00001d008412,Zm00001d008413	B73	Maize2	Shared	PH207_Cluster_1113	11.7305
B73_Cluster_0253	Zm00001d008450,Zm00001d008452,Zm00001d008453	B73	Maize2	Private	NA	1.73357871059,6.21984180132
B73_Cluster_0254	Zm00001d008457,Zm00001d008458,Zm00001d008460,Zm00001d008461,Zm00001d008462,Zm00001d008465,Zm00001d008466,Zm00001d008467,Zm00001d008468,Zm00001d008477,Zm00001d008478,Zm00001d008479,Zm00001d008485,Zm00001d008487,Zm00001d008488,Zm00001d008489	B73	Maize2	Shared	PH207_Cluster_1114	11.7313056583,11.7313056583,1.20794033522,0.682270371855,2.39460820172,2.39460820172,2.39460820172,1.73415657271,2.39460820172,2.39460820172,0.424965315719,2.39460820172,0.682270371855,0.682270371855,2.39460820172
B73_Cluster_0255	Zm00001d008494,Zm00001d008495,Zm00001d008496	B73	Maize2	Private	NA	11.7250471238,11.7250471238
B73_Cluster_0256	Zm00001d008529,Zm00001d008530	B73	Maize2	Private	NA	11.7845
B73_Cluster_0257	Zm00001d008581,Zm00001d008585	B73	Nonsyntenic	NA	NA	NA
B73_Cluster_0258	Zm00001d008582,Zm00001d008584	B73	Nonsyntenic	Private	NA	11.7393
B73_Cluster_0259	Zm00001d008601,Zm00001d008602	B73	Maize2	Shared	PH207_Cluster_1118	11.7591
B73_Cluster_0260	Zm00001d008632,Zm00001d008633	B73	Maize2	Shared	PH207_Cluster_1119	11.7372
B73_Cluster_0261	Zm00001d008634,Zm00001d008635	B73	Maize2	Private	NA	0.823538
B73_Cluster_0262	Zm00001d008645,Zm00001d008646	B73	Maize2	Shared	PH207_Cluster_1120	2.68893
B73_Cluster_0263	Zm00001d008671,Zm00001d008674	B73	Nonsyntenic	NA	NA	NA
B73_Cluster_0264	Zm00001d008769,Zm00001d008772	B73	Maize2	Private	NA	11.722
B73_Cluster_0265	Zm00001d008899,Zm00001d008901	B73	Nonsyntenic	Shared	PH207_Cluster_1121	11.7263
B73_Cluster_0266	Zm00001d008903,Zm00001d008905	B73	Maize2	Shared	PH207_Cluster_1123	11.7418
B73_Cluster_0267	Zm00001d008925,Zm00001d008927,Zm00001d008928,Zm00001d008929,Zm00001d008934	B73	Maize2	Shared	PH207_Cluster_1124	11.7476391822,1.50570513924,11.7476391822,8.00892721732
B73_Cluster_0268	Zm00001d008985,Zm00001d008987,Zm00001d008990	B73	Nonsyntenic	Shared	PH207_Cluster_1125	3.22247839978,3.59314235242
B73_Cluster_0269	Zm00001d009082,Zm00001d009083	B73	Maize2	Private	NA	2.33335
B73_Cluster_0270	Zm00001d009113,Zm00001d009124	B73	Nonsyntenic	Private	NA	11.8123
B73_Cluster_0271	Zm00001d009138,Zm00001d009140	B73	Maize2	Shared	PH207_Cluster_1128	11.8185
B73_Cluster_0272	Zm00001d009447,Zm00001d009448	B73	Maize2	Shared	PH207_Cluster_1131	10.8734
B73_Cluster_0273	Zm00001d009461,Zm00001d009462	B73	Nonsyntenic	Shared	PH207_Cluster_1132	0.000786012
B73_Cluster_0274	Zm00001d009489,Zm00001d009490	B73	Maize2	Private	NA	3.92015
B73_Cluster_0275	Zm00001d009566,Zm00001d009567	B73	Maize2	Private	NA	2.00309
B73_Cluster_0276	Zm00001d009600,Zm00001d009603,Zm00001d009605	B73	Maize2	Shared	PH207_Cluster_1134	5.38454729496,11.721280918
B73_Cluster_0277	Zm00001d009650,Zm00001d009652,Zm00001d009653,Zm00001d009657	B73	Maize2	Private	NA	7.70523973423,6.29952879906,6.29952879906
B73_Cluster_0278	Zm00001d009705,Zm00001d009706	B73	Maize2	Shared	PH207_Cluster_1136	11.7207
B73_Cluster_0279	Zm00001d009727,Zm00001d009728	B73	Maize2	Private	NA	11.8035
B73_Cluster_0280	Zm00001d009732,Zm00001d009734	B73	Maize2	Shared	PH207_Cluster_1138	5.96961
B73_Cluster_0281	Zm00001d009733,Zm00001d009735	B73	Maize2	Shared	PH207_Cluster_1139	1.28669
B73_Cluster_0282	Zm00001d009868,Zm00001d009870	B73	Nonsyntenic	Shared	PH207_Cluster_1143	11.6537
B73_Cluster_0283	Zm00001d009894,Zm00001d009895	B73	Maize2	Shared	PH207_Cluster_1145	11.7214
B73_Cluster_0284	Zm00001d009923,Zm00001d009924	B73	Nonsyntenic	Private	NA	11.7189
B73_Cluster_0285	Zm00001d009948,Zm00001d009950	B73	Maize2	Shared	PH207_Cluster_1146	11.7224
B73_Cluster_0286	Zm00001d010034,Zm00001d010036	B73	Nonsyntenic	Shared	PH207_Cluster_1147	11.7141
B73_Cluster_0287	Zm00001d010093,Zm00001d010094,Zm00001d010102,Zm00001d010105	B73	Nonsyntenic	Shared	PH207_Cluster_1148	11.9080674086,0.00594530017731,0.000483466308107
B73_Cluster_0288	Zm00001d010098,Zm00001d010099,Zm00001d010103,Zm00001d010104	B73	Nonsyntenic	Private	NA	0.0270978358412,0.00012940112595,0.0270978358412
B73_Cluster_0289	Zm00001d010152,Zm00001d010162	B73	Maize2	Shared	PH207_Cluster_1149	0.0852702
B73_Cluster_0290	Zm00001d010232,Zm00001d010233	B73	Maize2	Shared	PH207_Cluster_1151	11.7245
B73_Cluster_0291	Zm00001d010251,Zm00001d010255	B73	Maize2	Shared	PH207_Cluster_1152	11.7389
B73_Cluster_0292	Zm00001d010296,Zm00001d010297,Zm00001d010299,Zm00001d010302	B73	Nonsyntenic	Shared	PH207_Cluster_1153	0.606059092922,0.754098394156,11.7239752875
B73_Cluster_0293	Zm00001d010343,Zm00001d010345,Zm00001d010348	B73	Nonsyntenic	Private	NA	11.8016881086,4.24658814674
B73_Cluster_0294	Zm00001d010344,Zm00001d010347,Zm00001d010356	B73	Nonsyntenic	Private	NA	11.7859957462,11.7859957462
B73_Cluster_0295	Zm00001d010397,Zm00001d010398	B73	Maize2	Shared	PH207_Cluster_1154	8.17742
B73_Cluster_0296	Zm00001d010442,Zm00001d010448	B73	Maize2	Shared	PH207_Cluster_1156	8.74575
B73_Cluster_0297	Zm00001d010450,Zm00001d010451	B73	Maize2	Shared	PH207_Cluster_1157	2.89809
B73_Cluster_0298	Zm00001d010592,Zm00001d010593	B73	Nonsyntenic	Private	NA	11.7429
B73_Cluster_0299	Zm00001d010649,Zm00001d010650	B73	Maize2	Private	NA	11.7169
B73_Cluster_0300	Zm00001d010673,Zm00001d010675	B73	Maize2	Shared	PH207_Cluster_1158	0.598602
B73_Cluster_0301	Zm00001d010689,Zm00001d010690	B73	Maize2	Private	NA	7.97975
B73_Cluster_0302	Zm00001d010732,Zm00001d010733	B73	Maize2	Private	NA	11.7403
B73_Cluster_0303	Zm00001d010749,Zm00001d010751	B73	Maize2	Shared	PH207_Cluster_1161	11.7542
B73_Cluster_0304	Zm00001d010762,Zm00001d010771,Zm00001d010774	B73	Nonsyntenic	NA	NA	NA
B73_Cluster_0305	Zm00001d010764,Zm00001d010770,Zm00001d010773,Zm00001d010779,Zm00001d010782	B73	Maize2	Shared	PH207_Cluster_1162	11.7316285374,1.79557159656,11.7316285374,10.9745461488
B73_Cluster_0306	Zm00001d010768,Zm00001d010772,Zm00001d010780	B73	Nonsyntenic	Private	NA	0.00115409284132,0.00115409284132
B73_Cluster_0307	Zm00001d010775,Zm00001d010776	B73	Nonsyntenic	NA	NA	NA
B73_Cluster_0308	Zm00001d010870,Zm00001d010871	B73	Maize2	Private	NA	11.7005
B73_Cluster_0309	Zm00001d010875,Zm00001d010876	B73	Nonsyntenic	NA	NA	NA
B73_Cluster_0310	Zm00001d010924,Zm00001d010925,Zm00001d010926	B73	Maize2	Private	NA	11.7178439433,11.7178439433
B73_Cluster_0311	Zm00001d011004,Zm00001d011005	B73	Maize2	Shared	PH207_Cluster_1167	8.04312
B73_Cluster_0312	Zm00001d011014,Zm00001d011017,Zm00001d011026,Zm00001d011028	B73	Maize2	Private	NA	0.00173434910446,0.00202811353905,0.00202811353905
B73_Cluster_0313	Zm00001d011034,Zm00001d011035	B73	Maize2	Private	NA	7.98791
B73_Cluster_0314	Zm00001d011072,Zm00001d011073	B73	Maize2	Private	NA	11.8221
B73_Cluster_0315	Zm00001d011079,Zm00001d011080	B73	Maize2	Private	NA	1.9405
B73_Cluster_0316	Zm00001d011086,Zm00001d011087	B73	Maize2	Private	NA	7.32851
B73_Cluster_0317	Zm00001d011260,Zm00001d011262	B73	Maize2	Private	NA	5.93473
B73_Cluster_0318	Zm00001d011291,Zm00001d011292	B73	Nonsyntenic	NA	NA	NA
B73_Cluster_0319	Zm00001d011315,Zm00001d011319	B73	Maize2	Shared	PH207_Cluster_1169	11.2667
B73_Cluster_0320	Zm00001d011326,Zm00001d011327	B73	Maize2	Shared	PH207_Cluster_1170	11.7384
B73_Cluster_0321	Zm00001d011340,Zm00001d011342,Zm00001d011345	B73	Nonsyntenic	NA	NA	NA
B73_Cluster_0322	Zm00001d011348,Zm00001d011349	B73	Maize2	Private	NA	11.7236
B73_Cluster_0323	Zm00001d011367,Zm00001d011368	B73	Nonsyntenic	NA	NA	NA
B73_Cluster_0324	Zm00001d011417,Zm00001d011418,Zm00001d011419,Zm00001d011420,Zm00001d011422	B73	Maize2	Shared	PH207_Cluster_1171	8.3520943223,8.3520943223,8.3520943223,1.44891925103
B73_Cluster_0325	Zm00001d011428,Zm00001d011429	B73	Maize2	Private	NA	6.29209
B73_Cluster_0326	Zm00001d011550,Zm00001d011551	B73	Maize2	Shared	PH207_Cluster_1174	7.35263
B73_Cluster_0327	Zm00001d011582,Zm00001d011583,Zm00001d011584	B73	Maize2	Shared	PH207_Cluster_1175	0.565174003371,11.7289144092
B73_Cluster_0328	Zm00001d011589,Zm00001d011590	B73	Maize2	Shared	PH207_Cluster_1176	11.7218
B73_Cluster_0329	Zm00001d011625,Zm00001d011626,Zm00001d011627,Zm00001d011628,Zm00001d011629	B73	Maize2	Shared	PH207_Cluster_1177	11.7354332169,5.48456262086,11.7354332169,11.7354332169
B73_Cluster_0330	Zm00001d011641,Zm00001d011643	B73	Maize2	Shared	PH207_Cluster_1178	5.66544
B73_Cluster_0331	Zm00001d011654,Zm00001d011655,Zm00001d011656	B73	Maize2	Private	NA	4.64688042208,7.75282628816
B73_Cluster_0332	Zm00001d011723,Zm00001d011729	B73	Maize2	Shared	PH207_Cluster_1179	11.718
B73_Cluster_0333	Zm00001d011736,Zm00001d011737	B73	Maize2	Shared	PH207_Cluster_1180	2.1285
B73_Cluster_0334	Zm00001d011751,Zm00001d011752	B73	Maize2	Shared	PH207_Cluster_1181	6.08896
B73_Cluster_0335	Zm00001d011921,Zm00001d011922	B73	Maize2	Shared	PH207_Cluster_1186	11.7262
B73_Cluster_0336	Zm00001d011924,Zm00001d011925,Zm00001d011926	B73	Maize2	Shared	PH207_Cluster_1187	11.7152073121,2.60883168558
B73_Cluster_0337	Zm00001d011959,Zm00001d011964	B73	Maize2	Shared	PH207_Cluster_1188	0.698623
B73_Cluster_0338	Zm00001d012021,Zm00001d012022	B73	Maize2	Shared	PH207_Cluster_1190	6.99567
B73_Cluster_0339	Zm00001d012080,Zm00001d012081	B73	Maize2	Private	NA	11.7253
B73_Cluster_0340	Zm00001d012092,Zm00001d012095	B73	Maize2	Private	NA	11.7238
B73_Cluster_0341	Zm00001d012122,Zm00001d012124	B73	Nonsyntenic	NA	NA	NA
B73_Cluster_0342	Zm00001d012147,Zm00001d012152	B73	Maize2	Shared	PH207_Cluster_1194	11.7277
B73_Cluster_0343	Zm00001d012184,Zm00001d012185,Zm00001d012186,Zm00001d012187,Zm00001d012188	B73	Maize2	Shared	PH207_Cluster_1195	3.13260364818,10.0594913767,10.0594913767,0.59046970807
B73_Cluster_0344	Zm00001d012229,Zm00001d012231	B73	Maize2	Shared	PH207_Cluster_1196	0.574062
B73_Cluster_0345	Zm00001d012249,Zm00001d012252	B73	Maize2	Private	NA	5.06071
B73_Cluster_0346	Zm00001d012301,Zm00001d012306	B73	Maize2	Shared	PH207_Cluster_1197	3.002
B73_Cluster_0347	Zm00001d012362,Zm00001d012367	B73	Nonsyntenic	Private	NA	11.8342
B73_Cluster_0348	Zm00001d012363,Zm00001d012366,Zm00001d012368,Zm00001d012371,Zm00001d012373,Zm00001d012375,Zm00001d012377	B73	Maize2	Shared	PH207_Cluster_1199	11.2867104022,9.96745974523,3.16631896924,9.96745974523,11.717716272,11.717716272
B73_Cluster_0349	Zm00001d012399,Zm00001d012400	B73	Maize2	Private	NA	3.3705
B73_Cluster_0350	Zm00001d012427,Zm00001d012430	B73	Maize2	Shared	PH207_Cluster_1201	9.27533
B73_Cluster_0351	Zm00001d012532,Zm00001d012533	B73	Maize2	Shared	PH207_Cluster_1203	0.675785
B73_Cluster_0352	Zm00001d012573,Zm00001d012574	B73	Maize2	Private	NA	3.37813
B73_Cluster_0353	Zm00001d012584,Zm00001d012585	B73	Maize2	Shared	PH207_Cluster_1204	11.7057
B73_Cluster_0354	Zm00001d012696,Zm00001d012697	B73	Maize2	Shared	PH207_Cluster_1206	11.7197
B73_Cluster_0355	Zm00001d012741,Zm00001d012742	B73	Maize2	Private	NA	11.7807
B73_Cluster_0356	Zm00001d012772,Zm00001d012773	B73	Maize2	Shared	PH207_Cluster_0468	0.0205286
B73_Cluster_0357	Zm00001d012780,Zm00001d012782,Zm00001d012785,Zm00001d012788	B73	Maize2	Shared	PH207_Cluster_1207	10.0188629928,11.7293790625,7.17753084957
B73_Cluster_0358	Zm00001d012899,Zm00001d012900,Zm00001d012906	B73	Maize2	Shared	PH207_Cluster_0705	11.7457643341,9.33903101237
B73_Cluster_0359	Zm00001d012907,Zm00001d012909	B73	Maize2	Shared	PH207_Cluster_0706	0.581977
B73_Cluster_0360	Zm00001d012943,Zm00001d012947	B73	Nonsyntenic	NA	NA	NA
B73_Cluster_0361	Zm00001d012946,Zm00001d012949	B73	Nonsyntenic	NA	NA	NA
B73_Cluster_0362	Zm00001d012967,Zm00001d012968	B73	Maize2	Private	NA	6.61362
B73_Cluster_0363	Zm00001d012980,Zm00001d012981,Zm00001d012982	B73	Maize2	Shared	PH207_Cluster_0708	11.724718983,11.724718983
B73_Cluster_0364	Zm00001d013035,Zm00001d013037	B73	Maize2	Private	NA	11.7265
B73_Cluster_0365	Zm00001d013066,Zm00001d013067	B73	Maize2	Shared	PH207_Cluster_0710	4.79407
B73_Cluster_0366	Zm00001d013086,Zm00001d013087	B73	Maize2	Private	NA	10.0729
B73_Cluster_0367	Zm00001d013105,Zm00001d013109	B73	Maize2	Shared	PH207_Cluster_0711	2.76822
B73_Cluster_0368	Zm00001d013114,Zm00001d013115	B73	Maize2	Private	NA	5.97489
B73_Cluster_0369	Zm00001d013188,Zm00001d013190	B73	Maize2	Private	NA	2.30893
B73_Cluster_0370	Zm00001d013225,Zm00001d013228	B73	Maize2	Private	NA	11.8131
B73_Cluster_0371	Zm00001d013226,Zm00001d013229,Zm00001d013230,Zm00001d013231	B73	Maize2	Shared	PH207_Cluster_0715	0.115928316027,0.868519071707,11.3591402978
B73_Cluster_0372	Zm00001d013268,Zm00001d013269	B73	Maize2	Shared	PH207_Cluster_0718	11.7514
B73_Cluster_0373	Zm00001d013365,Zm00001d013366	B73	Nonsyntenic	NA	NA	NA
B73_Cluster_0374	Zm00001d013418,Zm00001d013423	B73	Maize2	Shared	PH207_Cluster_0720	11.715
B73_Cluster_0375	Zm00001d013435,Zm00001d013439	B73	Maize2	Private	NA	0.487092
B73_Cluster_0376	Zm00001d013514,Zm00001d013516	B73	Nonsyntenic	Shared	PH207_Cluster_0723	1.11349
B73_Cluster_0377	Zm00001d013575,Zm00001d013578	B73	Maize2	Private	NA	0.360761
B73_Cluster_0378	Zm00001d013616,Zm00001d013617,Zm00001d013619	B73	Maize2	Shared	PH207_Cluster_0725	0.298900108562,11.7351600517
B73_Cluster_0379	Zm00001d013662,Zm00001d013663	B73	Maize2	Private	NA	11.713
B73_Cluster_0380	Zm00001d013719,Zm00001d013720	B73	Maize2	Private	NA	11.7278
B73_Cluster_0381	Zm00001d013722,Zm00001d013723	B73	Maize2	Private	NA	11.7234
B73_Cluster_0382	Zm00001d013724,Zm00001d013725	B73	Maize2	Private	NA	8.92783
B73_Cluster_0383	Zm00001d013787,Zm00001d013788	B73	Maize2	Private	NA	11.7241
B73_Cluster_0384	Zm00001d013796,Zm00001d013797	B73	Maize2	Shared	PH207_Cluster_0728	2.12109
B73_Cluster_0385	Zm00001d013809,Zm00001d013810,Zm00001d013811	B73	Maize2	Shared	PH207_Cluster_0729	11.7201501723,6.85631569045
B73_Cluster_0386	Zm00001d013900,Zm00001d013903	B73	Maize2	Private	NA	2.21947
B73_Cluster_0387	Zm00001d013901,Zm00001d013904	B73	Nonsyntenic	Private	NA	11.7339
B73_Cluster_0388	Zm00001d013945,Zm00001d013949	B73	Maize2	Shared	PH207_Cluster_0731	11.7253
B73_Cluster_0389	Zm00001d013950,Zm00001d013955	B73	Maize2	Shared	PH207_Cluster_0732	11.7231
B73_Cluster_0390	Zm00001d014066,Zm00001d014070,Zm00001d014072	B73	Maize2	Private	NA	11.7406585585,3.43082140707
B73_Cluster_0391	Zm00001d014100,Zm00001d014101	B73	Maize2	Private	NA	11.8353
B73_Cluster_0392	Zm00001d014104,Zm00001d014106	B73	Nonsyntenic	NA	NA	NA
B73_Cluster_0393	Zm00001d014134,Zm00001d014136	B73	Maize2	Shared	PH207_Cluster_0734	11.7239
B73_Cluster_0394	Zm00001d014153,Zm00001d014155	B73	Maize2	Private	NA	1.6934
B73_Cluster_0395	Zm00001d014159,Zm00001d014160	B73	Maize2	Shared	PH207_Cluster_0735	11.723
B73_Cluster_0396	Zm00001d014217,Zm00001d014219	B73	Maize2	Private	NA	11.7495
B73_Cluster_0397	Zm00001d014249,Zm00001d014250	B73	Maize2	Private	NA	2.14618
B73_Cluster_0398	Zm00001d014302,Zm00001d014303	B73	Nonsyntenic	Private	NA	0.196617
B73_Cluster_0399	Zm00001d014328,Zm00001d014329	B73	Nonsyntenic	Shared	PH207_Cluster_0738	11.7186
B73_Cluster_0400	Zm00001d014351,Zm00001d014352,Zm00001d014353	B73	Nonsyntenic	NA	NA	NA
B73_Cluster_0401	Zm00001d014367,Zm00001d014369	B73	Maize1	Private	NA	2.35464
B73_Cluster_0402	Zm00001d014378,Zm00001d014379	B73	Maize1	Private	NA	11.6458
B73_Cluster_0403	Zm00001d014394,Zm00001d014397	B73	Nonsyntenic	NA	NA	NA
B73_Cluster_0404	Zm00001d014395,Zm00001d014399	B73	Nonsyntenic	NA	NA	NA
B73_Cluster_0405	Zm00001d014443,Zm00001d014447	B73	Nonsyntenic	Shared	PH207_Cluster_0739	11.7267
B73_Cluster_0406	Zm00001d014451,Zm00001d014456,Zm00001d014458	B73	Maize1	Shared	PH207_Cluster_0740	11.7399538341,0.955261425198
B73_Cluster_0407	Zm00001d014468,Zm00001d014469,Zm00001d014470	B73	Maize1	Private	NA	5.32104997389,5.32104997389
B73_Cluster_0408	Zm00001d014510,Zm00001d014511	B73	Nonsyntenic	NA	NA	NA
B73_Cluster_0409	Zm00001d014540,Zm00001d014542	B73	Maize1	Private	NA	5.06374
B73_Cluster_0410	Zm00001d014555,Zm00001d014557	B73	Maize1	Shared	PH207_Cluster_0741	11.7249
B73_Cluster_0411	Zm00001d014601,Zm00001d014602,Zm00001d014603,Zm00001d014606,Zm00001d014608	B73	Nonsyntenic	Shared	PH207_Cluster_0742	0.00175716398916,0.00286263104249,11.9193739623,0.00282056463493
B73_Cluster_0412	Zm00001d014613,Zm00001d014614,Zm00001d014615,Zm00001d014617	B73	Maize1	Shared	PH207_Cluster_0743	7.0759156996,9.2041595998,11.7325277488
B73_Cluster_0413	Zm00001d014623,Zm00001d014625	B73	Maize1	Shared	PH207_Cluster_0744	11.746
B73_Cluster_0414	Zm00001d014628,Zm00001d014629,Zm00001d014630	B73	Maize1	Shared	PH207_Cluster_0745	0.00976863002487,11.7926464477
B73_Cluster_0415	Zm00001d014649,Zm00001d014650,Zm00001d014652,Zm00001d014654	B73	Maize1	Shared	PH207_Cluster_0746	10.7426241345,11.723051959,11.723051959
B73_Cluster_0416	Zm00001d014712,Zm00001d014714	B73	Nonsyntenic	NA	NA	NA
B73_Cluster_0417	Zm00001d014721,Zm00001d014722	B73	Maize1	Shared	PH207_Cluster_0750	11.7495
B73_Cluster_0418	Zm00001d014731,Zm00001d014732	B73	Maize1	Private	NA	5.34398
B73_Cluster_0419	Zm00001d014734,Zm00001d014737	B73	Maize1	Shared	PH207_Cluster_0751	10.4372
B73_Cluster_0420	Zm00001d014817,Zm00001d014818,Zm00001d014819,Zm00001d014820	B73	Maize1	Shared	PH207_Cluster_0752	3.44718677629,4.87544749646,4.87544749646
B73_Cluster_0421	Zm00001d014835,Zm00001d014839	B73	Nonsyntenic	Private	NA	11.7443
B73_Cluster_0422	Zm00001d014840,Zm00001d014842	B73	Maize1	Shared	PH207_Cluster_0753	6.90507
B73_Cluster_0423	Zm00001d014880,Zm00001d014882	B73	Maize1	Private	NA	11.7921
B73_Cluster_0424	Zm00001d014903,Zm00001d014906	B73	Nonsyntenic	Shared	PH207_Cluster_0754	11.7353
B73_Cluster_0425	Zm00001d014944,Zm00001d014945	B73	Maize1	Shared	PH207_Cluster_0756	7.81061
B73_Cluster_0426	Zm00001d014954,Zm00001d014957	B73	Maize1	Shared	PH207_Cluster_0757	11.7137
B73_Cluster_0427	Zm00001d014968,Zm00001d014973	B73	Nonsyntenic	Shared	PH207_Cluster_0758	11.7249
B73_Cluster_0428	Zm00001d015005,Zm00001d015006	B73	Maize1	Private	NA	0.566346
B73_Cluster_0429	Zm00001d015018,Zm00001d015019	B73	Maize1	Private	NA	11.7239
B73_Cluster_0430	Zm00001d015040,Zm00001d015043	B73	Maize1	Private	NA	11.6695
B73_Cluster_0431	Zm00001d015041,Zm00001d015047,Zm00001d015052,Zm00001d015057	B73	Maize1	Private	NA	6.88135751865,11.7463739984,11.7463739984
B73_Cluster_0432	Zm00001d015053,Zm00001d015054	B73	Maize1	Shared	PH207_Cluster_0762	8.78269
B73_Cluster_0433	Zm00001d015068,Zm00001d015070,Zm00001d015072,Zm00001d015075,Zm00001d015076,Zm00001d015077,Zm00001d015079	B73	Maize1	Shared	PH207_Cluster_0764	1.90676695231,3.51852154124,1.97585499717,11.787384594,4.85417969567,4.85417969567
B73_Cluster_0434	Zm00001d015071,Zm00001d015073	B73	Nonsyntenic	NA	NA	NA
B73_Cluster_0435	Zm00001d015097,Zm00001d015098	B73	Nonsyntenic	Private	NA	11.7512
B73_Cluster_0436	Zm00001d015174,Zm00001d015175	B73	Maize1	Shared	PH207_Cluster_0765	11.7303
B73_Cluster_0437	Zm00001d015216,Zm00001d015217,Zm00001d015220,Zm00001d015224	B73	Maize1	Shared	PH207_Cluster_0766	11.7369023218,11.7369023218,11.7369023218
B73_Cluster_0438	Zm00001d015234,Zm00001d015239	B73	Maize1	Private	NA	8.92032
B73_Cluster_0439	Zm00001d015253,Zm00001d015255	B73	Nonsyntenic	Private	NA	0.250945
B73_Cluster_0440	Zm00001d015367,Zm00001d015372	B73	Maize1	Shared	PH207_Cluster_0769	11.7261
B73_Cluster_0441	Zm00001d015444,Zm00001d015445	B73	Nonsyntenic	Private	NA	9.61484
B73_Cluster_0442	Zm00001d015495,Zm00001d015499	B73	Maize1	Shared	PH207_Cluster_0771	11.7225
B73_Cluster_0443	Zm00001d015551,Zm00001d015552	B73	Nonsyntenic	NA	NA	NA
B73_Cluster_0444	Zm00001d015578,Zm00001d015579,Zm00001d015589,Zm00001d015592	B73	Maize1	Shared	PH207_Cluster_0773	5.31369635556,11.7335231581,11.7335231581
B73_Cluster_0445	Zm00001d015636,Zm00001d015637	B73	Maize1	Shared	PH207_Cluster_0774	2.37669
B73_Cluster_0446	Zm00001d015709,Zm00001d015711	B73	Nonsyntenic	NA	NA	NA
B73_Cluster_0447	Zm00001d015820,Zm00001d015821,Zm00001d015825	B73	Maize1	Shared	PH207_Cluster_0777	0.0428100604095,0.0428100604095
B73_Cluster_0448	Zm00001d015822,Zm00001d015823	B73	Nonsyntenic	NA	NA	NA
B73_Cluster_0449	Zm00001d015905,Zm00001d015912,Zm00001d015914	B73	Nonsyntenic	Shared	PH207_Cluster_0779	0.00135720206582,11.8896551642
B73_Cluster_0450	Zm00001d015963,Zm00001d015964	B73	Maize1	Shared	PH207_Cluster_0780	0.755591
B73_Cluster_0451	Zm00001d015975,Zm00001d015976	B73	Maize1	Private	NA	11.7121
B73_Cluster_0452	Zm00001d016022,Zm00001d016024,Zm00001d016025,Zm00001d016027,Zm00001d016035	B73	Maize1	Shared	PH207_Cluster_0782	4.96339578874,11.7317266952,11.7317266952,11.3320085083
B73_Cluster_0453	Zm00001d016054,Zm00001d016056	B73	Nonsyntenic	NA	NA	NA
B73_Cluster_0454	Zm00001d016085,Zm00001d016087	B73	Nonsyntenic	Shared	PH207_Cluster_0783	11.8109
B73_Cluster_0455	Zm00001d016120,Zm00001d016121	B73	Nonsyntenic	Private	NA	4.99828
B73_Cluster_0456	Zm00001d016136,Zm00001d016137,Zm00001d016139,Zm00001d016140,Zm00001d016142,Zm00001d016143,Zm00001d016145	B73	Maize1	Shared	PH207_Cluster_0784	11.7198426725,0.737057275176,0.907911818835,0.768296651485,1.00174179783,1.20690457612
B73_Cluster_0457	Zm00001d016158,Zm00001d016159	B73	Maize1	Private	NA	11.7429
B73_Cluster_0458	Zm00001d016177,Zm00001d016179,Zm00001d016182,Zm00001d016185	B73	Maize1	Private	NA	11.7389930894,11.7389930894,5.67969310684
B73_Cluster_0459	Zm00001d016180,Zm00001d016181	B73	Maize1	Private	NA	4.46725
B73_Cluster_0460	Zm00001d016203,Zm00001d016207	B73	Maize1	Private	NA	11.7961
B73_Cluster_0461	Zm00001d016219,Zm00001d016220	B73	Maize1	Shared	PH207_Cluster_0789	1.64776
B73_Cluster_0462	Zm00001d016260,Zm00001d016262	B73	Maize1	Shared	PH207_Cluster_0790	11.7279
B73_Cluster_0463	Zm00001d016306,Zm00001d016307	B73	Maize1	Shared	PH207_Cluster_0792	11.7146
B73_Cluster_0464	Zm00001d016387,Zm00001d016389,Zm00001d016391,Zm00001d016393	B73	Nonsyntenic	Shared	PH207_Cluster_0793	0.00223973452397,11.9080457333,11.9080457333
B73_Cluster_0465	Zm00001d016395,Zm00001d016396	B73	Maize1	Shared	PH207_Cluster_0795	8.06251
B73_Cluster_0466	Zm00001d016414,Zm00001d016415,Zm00001d016417,Zm00001d016420,Zm00001d016424,Zm00001d016427,Zm00001d016428,Zm00001d016429,Zm00001d016431,Zm00001d016435	B73	Nonsyntenic	Shared	PH207_Cluster_0796	5.65478912806,11.7316185085,11.7316185085,2.46764786809,1.24921809653,5.65478912806,11.7316185085,11.7316185085,11.7316185085
B73_Cluster_0467	Zm00001d016476,Zm00001d016477	B73	Maize1	Shared	PH207_Cluster_0798	0.831968
B73_Cluster_0468	Zm00001d016567,Zm00001d016568	B73	Maize1	Shared	PH207_Cluster_0800	11.748
B73_Cluster_0469	Zm00001d016607,Zm00001d016613	B73	Maize1	Private	NA	11.8228
B73_Cluster_0470	Zm00001d016648,Zm00001d016649	B73	Maize1	Shared	PH207_Cluster_0801	11.728
B73_Cluster_0471	Zm00001d016660,Zm00001d016661	B73	Maize1	Private	NA	0.136121
B73_Cluster_0472	Zm00001d016719,Zm00001d016730	B73	Maize1	Private	NA	11.7361
B73_Cluster_0473	Zm00001d016738,Zm00001d016740,Zm00001d016741	B73	Maize1	Shared	PH207_Cluster_0802	11.7267549343,11.7267549343
B73_Cluster_0474	Zm00001d016773,Zm00001d016777,Zm00001d016782	B73	Maize1	Private	NA	1.40976286342,11.7086821612
B73_Cluster_0475	Zm00001d016841,Zm00001d016842,Zm00001d016844	B73	Maize1	Shared	PH207_Cluster_0804	0.00196764001601,11.9003456175
B73_Cluster_0476	Zm00001d016867,Zm00001d016868,Zm00001d016870,Zm00001d016871	B73	Maize1	Shared	PH207_Cluster_0806	9.68901689655,2.99141632547,9.68901689655
B73_Cluster_0477	Zm00001d016882,Zm00001d016883	B73	Maize1	Private	NA	11.8086
B73_Cluster_0478	Zm00001d016884,Zm00001d016885	B73	Maize1	Private	NA	3.88889
B73_Cluster_0479	Zm00001d016899,Zm00001d016900	B73	Maize1	Private	NA	11.824
B73_Cluster_0480	Zm00001d016939,Zm00001d016940	B73	Maize1	Private	NA	11.8355
B73_Cluster_0481	Zm00001d016946,Zm00001d016947,Zm00001d016948,Zm00001d016949	B73	Maize1	Private	NA	1.51978668539,0.753847425098,11.7109289756
B73_Cluster_0482	Zm00001d017001,Zm00001d017008,Zm00001d017009,Zm00001d017014,Zm00001d017019	B73	Nonsyntenic	Shared	PH207_Cluster_0810	0.00435808747436,0.00231297205042,0.00135896079349,11.9211222197
B73_Cluster_0483	Zm00001d017021,Zm00001d017022	B73	Maize1	Private	NA	11.862
B73_Cluster_0484	Zm00001d017031,Zm00001d017032,Zm00001d017033	B73	Maize1	Private	NA	7.36250848059,5.64425049526
B73_Cluster_0485	Zm00001d017043,Zm00001d017045	B73	Maize1	Shared	PH207_Cluster_0811	11.7253
B73_Cluster_0486	Zm00001d017161,Zm00001d017163	B73	Nonsyntenic	NA	NA	NA
B73_Cluster_0487	Zm00001d017164,Zm00001d017165	B73	Maize1	Private	NA	11.7517
B73_Cluster_0488	Zm00001d017188,Zm00001d017189,Zm00001d017190,Zm00001d017191,Zm00001d017192	B73	Nonsyntenic	Shared	PH207_Cluster_0813	1.35990493232,7.40582684859,2.28666910033,11.7272692061
B73_Cluster_0489	Zm00001d017222,Zm00001d017234,Zm00001d017236,Zm00001d017237,Zm00001d017238	B73	Nonsyntenic	Shared	PH207_Cluster_0814	11.8988857252,0.00223799724142,0.000975753469741,11.8988857252
B73_Cluster_0490	Zm00001d017228,Zm00001d017229	B73	Nonsyntenic	NA	NA	NA
B73_Cluster_0491	Zm00001d017274,Zm00001d017275,Zm00001d017276,Zm00001d017279	B73	Maize1	Shared	PH207_Cluster_0815	10.9532461734,11.7387633277,1.4531607786
B73_Cluster_0492	Zm00001d017285,Zm00001d017286	B73	Maize1	Private	NA	11.816
B73_Cluster_0493	Zm00001d017326,Zm00001d017329	B73	Maize1	Shared	PH207_Cluster_0816	11.7185
B73_Cluster_0494	Zm00001d017334,Zm00001d017335	B73	Maize1	Private	NA	0.419298
B73_Cluster_0495	Zm00001d017336,Zm00001d017340	B73	Nonsyntenic	NA	NA	NA
B73_Cluster_0496	Zm00001d017383,Zm00001d017385	B73	Maize1	Shared	PH207_Cluster_0819	8.16611
B73_Cluster_0497	Zm00001d017427,Zm00001d017429	B73	Maize1	Shared	PH207_Cluster_0820	11.7849
B73_Cluster_0498	Zm00001d017458,Zm00001d017459	B73	Maize1	Private	NA	11.7415
B73_Cluster_0499	Zm00001d017462,Zm00001d017466	B73	Maize1	Shared	PH207_Cluster_0821	11.7171
B73_Cluster_0500	Zm00001d017477,Zm00001d017478,Zm00001d017480	B73	Maize1	Shared	PH207_Cluster_0821	0.00630877880734,0.00558003490107
B73_Cluster_0501	Zm00001d017493,Zm00001d017494,Zm00001d017495	B73	Maize1	Private	NA	9.14558674011,9.14558674011
B73_Cluster_0502	Zm00001d017499,Zm00001d017500	B73	Maize1	Private	NA	11.7152
B73_Cluster_0503	Zm00001d017508,Zm00001d017510	B73	Maize1	Private	NA	11.7322
B73_Cluster_0504	Zm00001d017534,Zm00001d017535	B73	Maize1	Shared	PH207_Cluster_0825	11.7178
B73_Cluster_0505	Zm00001d017570,Zm00001d017571	B73	Maize1	Shared	PH207_Cluster_0826	11.7156
B73_Cluster_0506	Zm00001d017591,Zm00001d017592	B73	Maize1	Private	NA	11.7475
B73_Cluster_0507	Zm00001d017612,Zm00001d017615	B73	Maize1	Shared	PH207_Cluster_0830	11.7383
B73_Cluster_0508	Zm00001d017646,Zm00001d017647,Zm00001d017648	B73	Maize1	Shared	PH207_Cluster_0831	1.69448890213,4.58557992335
B73_Cluster_0509	Zm00001d017713,Zm00001d017714	B73	Maize1	Private	NA	11.7285
B73_Cluster_0510	Zm00001d017731,Zm00001d017732,Zm00001d017733,Zm00001d017734,Zm00001d017735,Zm00001d017736,Zm00001d017737,Zm00001d017740,Zm00001d017741	B73	Nonsyntenic	Shared	PH207_Cluster_0832	4.65348312278,0.444909937015,1.85965533767,1.17832757486,6.6272189444,4.07543055628,6.6272189444,11.7331243051
B73_Cluster_0511	Zm00001d017776,Zm00001d017777	B73	Maize1	Private	NA	0.00796543
B73_Cluster_0512	Zm00001d017786,Zm00001d017787	B73	Maize1	Private	NA	11.8236
B73_Cluster_0513	Zm00001d017814,Zm00001d017817	B73	Maize1	Shared	PH207_Cluster_0833	11.7676
B73_Cluster_0514	Zm00001d017840,Zm00001d017841	B73	Maize1	Shared	PH207_Cluster_0834	11.7217
B73_Cluster_0515	Zm00001d017864,Zm00001d017866,Zm00001d017867,Zm00001d017869	B73	Maize1	Shared	PH207_Cluster_0836	3.17192769728,3.17192769728,1.28859391461
B73_Cluster_0516	Zm00001d017865,Zm00001d017868	B73	Maize1	Private	NA	0.0458867
B73_Cluster_0517	Zm00001d017952,Zm00001d017953	B73	Maize1	Private	NA	5.98824
B73_Cluster_0518	Zm00001d017973,Zm00001d017974,Zm00001d017975	B73	Nonsyntenic	Shared	PH207_Cluster_0838	11.7173546692,2.30590276648
B73_Cluster_0519	Zm00001d018002,Zm00001d018003	B73	Nonsyntenic	NA	NA	NA
B73_Cluster_0520	Zm00001d018065,Zm00001d018066	B73	Maize1	Private	NA	11.7761
B73_Cluster_0521	Zm00001d018105,Zm00001d018106,Zm00001d018107	B73	Maize1	Shared	PH207_Cluster_0841	10.2521332984,11.72980426
B73_Cluster_0522	Zm00001d018123,Zm00001d018124	B73	Maize1	Private	NA	11.8257
B73_Cluster_0523	Zm00001d018155,Zm00001d018156	B73	Maize1	Private	NA	11.7438
B73_Cluster_0524	Zm00001d018181,Zm00001d018184	B73	Maize1	Shared	PH207_Cluster_0844	11.7562
B73_Cluster_0525	Zm00001d018182,Zm00001d018185	B73	Maize1	Shared	PH207_Cluster_0845	11.7544
B73_Cluster_0526	Zm00001d018183,Zm00001d018187	B73	Maize1	Shared	PH207_Cluster_0846	9.91648
B73_Cluster_0527	Zm00001d018251,Zm00001d018253,Zm00001d018254	B73	Maize1	Private	NA	7.91918787872,11.7119704891
B73_Cluster_0528	Zm00001d018281,Zm00001d018282	B73	Maize1	Shared	PH207_Cluster_0848	11.7235
B73_Cluster_0529	Zm00001d018321,Zm00001d018322,Zm00001d018323,Zm00001d018324	B73	Maize1	Private	NA	1.11409995012,11.7206987398,11.7206987398
B73_Cluster_0530	Zm00001d018329,Zm00001d018332	B73	Maize1	Private	NA	11.7861
B73_Cluster_0531	Zm00001d018336,Zm00001d018340	B73	Maize1	Private	NA	11.7394
B73_Cluster_0532	Zm00001d018451,Zm00001d018452	B73	Maize1	Shared	PH207_Cluster_0850	11.714
B73_Cluster_0533	Zm00001d018505,Zm00001d018506	B73	Maize1	Private	NA	0.268886
B73_Cluster_0534	Zm00001d018614,Zm00001d018615	B73	Maize1	Shared	PH207_Cluster_0978	0.769227
B73_Cluster_0535	Zm00001d018618,Zm00001d018619,Zm00001d018620	B73	Maize1	Private	NA	11.7523361988,11.7523361988
B73_Cluster_0536	Zm00001d018628,Zm00001d018629,Zm00001d018630,Zm00001d018631	B73	Maize1	Shared	PH207_Cluster_0979	3.64560455544,6.06475939509,11.7264446017
B73_Cluster_0537	Zm00001d018632,Zm00001d018633	B73	Maize1	Private	NA	11.7202
B73_Cluster_0538	Zm00001d018648,Zm00001d018649,Zm00001d018650,Zm00001d018652	B73	Maize1	Shared	PH207_Cluster_0980	9.3496581831,11.7342761914,11.7342761914
B73_Cluster_0539	Zm00001d018670,Zm00001d018673	B73	Maize1	Private	NA	11.7286
B73_Cluster_0540	Zm00001d018680,Zm00001d018681,Zm00001d018685,Zm00001d018686,Zm00001d018687,Zm00001d018690,Zm00001d018691,Zm00001d018692	B73	Maize1	Shared	PH207_Cluster_0982	5.94325371322,11.7251640356,4.86779033435,4.86779033435,4.86779033435,2.97903220609,3.34644288205
B73_Cluster_0541	Zm00001d018682,Zm00001d018683	B73	Maize1	Shared	PH207_Cluster_0983	11.7333
B73_Cluster_0542	Zm00001d018700,Zm00001d018701	B73	Nonsyntenic	NA	NA	NA
B73_Cluster_0543	Zm00001d018703,Zm00001d018705	B73	Maize1	Shared	PH207_Cluster_0981	5.35942
B73_Cluster_0544	Zm00001d018708,Zm00001d018709	B73	Maize1	Private	NA	11.715
B73_Cluster_0545	Zm00001d018710,Zm00001d018711	B73	Nonsyntenic	Private	NA	11.7778
B73_Cluster_0546	Zm00001d018734,Zm00001d018737,Zm00001d018738	B73	Maize1	Shared	PH207_Cluster_0987	11.7221237598,11.7221237598
B73_Cluster_0547	Zm00001d018759,Zm00001d018760,Zm00001d018762,Zm00001d018764,Zm00001d018766	B73	Maize1	Private	NA	0.496512076854,1.02570303215,1.02570303215,1.01259853273
B73_Cluster_0548	Zm00001d018761,Zm00001d018763,Zm00001d018765	B73	Nonsyntenic	Private	NA	11.7318915396,11.7318915396
B73_Cluster_0549	Zm00001d018830,Zm00001d018837	B73	Maize1	Shared	PH207_Cluster_0989	11.7236
B73_Cluster_0550	Zm00001d018844,Zm00001d018845	B73	Maize1	Shared	PH207_Cluster_0990	11.7427
B73_Cluster_0551	Zm00001d018846,Zm00001d018847	B73	Maize1	Shared	PH207_Cluster_0991	9.38525
B73_Cluster_0552	Zm00001d018848,Zm00001d018853,Zm00001d018854,Zm00001d018855,Zm00001d018857	B73	Maize1	Shared	PH207_Cluster_0992	5.7692188818,2.25696835063,0.542513055195,5.7692188818
B73_Cluster_0553	Zm00001d018874,Zm00001d018876,Zm00001d018877,Zm00001d018879,Zm00001d018880	B73	Maize1	Shared	PH207_Cluster_0993	11.7211717585,11.7211717585,11.7211717585,7.41586026246
B73_Cluster_0554	Zm00001d018918,Zm00001d018924	B73	Maize1	Private	NA	11.7851
B73_Cluster_0555	Zm00001d018965,Zm00001d018966	B73	Maize1	Private	NA	11.7287
B73_Cluster_0556	Zm00001d018976,Zm00001d018977	B73	Maize1	Shared	PH207_Cluster_0995	11.726
B73_Cluster_0557	Zm00001d018989,Zm00001d018990,Zm00001d018994,Zm00001d018995,Zm00001d018998,Zm00001d019000,Zm00001d019001	B73	Nonsyntenic	Shared	PH207_Cluster_0997	0.4032617577,4.58958690808,4.58958690808,4.58958690808,4.58958690808,11.73627073
B73_Cluster_0558	Zm00001d019032,Zm00001d019033	B73	Nonsyntenic	NA	NA	NA
B73_Cluster_0559	Zm00001d019034,Zm00001d019035	B73	Maize1	Shared	PH207_Cluster_0998	1.53604
B73_Cluster_0560	Zm00001d019043,Zm00001d019044	B73	Maize1	Private	NA	8.52123
B73_Cluster_0561	Zm00001d019057,Zm00001d019059	B73	Maize1	Shared	PH207_Cluster_0999	11.7234
B73_Cluster_0562	Zm00001d019064,Zm00001d019065,Zm00001d019066	B73	Nonsyntenic	Shared	PH207_Cluster_1000	11.7276698025,11.7276698025
B73_Cluster_0563	Zm00001d019079,Zm00001d019084,Zm00001d019086	B73	Maize1	Shared	PH207_Cluster_1001	0.471855340793,11.7171218696
B73_Cluster_0564	Zm00001d019096,Zm00001d019098	B73	Maize1	Shared	PH207_Cluster_1002	11.7502
B73_Cluster_0565	Zm00001d019120,Zm00001d019122	B73	Maize1	Private	NA	0.00613818
B73_Cluster_0566	Zm00001d019155,Zm00001d019160,Zm00001d019162	B73	Nonsyntenic	Private	NA	0.000341761224596,11.8990116875
B73_Cluster_0567	Zm00001d019213,Zm00001d019214	B73	Maize1	Shared	PH207_Cluster_1004	11.7344
B73_Cluster_0568	Zm00001d019246,Zm00001d019247	B73	Nonsyntenic	Shared	PH207_Cluster_1007	11.7311
B73_Cluster_0569	Zm00001d019250,Zm00001d019251	B73	Nonsyntenic	Shared	PH207_Cluster_0412	11.8953
B73_Cluster_0570	Zm00001d019254,Zm00001d019256,Zm00001d019258,Zm00001d019259,Zm00001d019265	B73	Maize1	Shared	PH207_Cluster_1008	7.02756953497,9.52615138124,9.52615138124,6.01593931572
B73_Cluster_0571	Zm00001d019270,Zm00001d019271,Zm00001d019274	B73	Maize1	Shared	PH207_Cluster_1009	6.67884361,6.67884361
B73_Cluster_0572	Zm00001d019279,Zm00001d019280	B73	Maize1	Shared	PH207_Cluster_1010	11.7402
B73_Cluster_0573	Zm00001d019290,Zm00001d019291	B73	Maize1	Private	PH207_Cluster_1011	11.7327
B73_Cluster_0574	Zm00001d019300,Zm00001d019302	B73	Maize1	Shared	PH207_Cluster_1012	11.8143
B73_Cluster_0575	Zm00001d019303,Zm00001d019304	B73	Maize1	Shared	PH207_Cluster_1013	11.7504
B73_Cluster_0576	Zm00001d019306,Zm00001d019311	B73	Maize1	Shared	PH207_Cluster_1014	5.94422
B73_Cluster_0577	Zm00001d019333,Zm00001d019334	B73	Nonsyntenic	Shared	PH207_Cluster_1015	11.7224
B73_Cluster_0578	Zm00001d019373,Zm00001d019374	B73	Maize1	Shared	PH207_Cluster_1016	3.17147
B73_Cluster_0579	Zm00001d019380,Zm00001d019385,Zm00001d019394	B73	Maize1	Private	PH207_Cluster_1016	0.758007676427,6.66433492343
B73_Cluster_0580	Zm00001d019399,Zm00001d019400	B73	Maize1	Shared	PH207_Cluster_1017	11.7345
B73_Cluster_0581	Zm00001d019405,Zm00001d019406,Zm00001d019407	B73	Maize1	Private	NA	11.7305544708,6.24122046976
B73_Cluster_0582	Zm00001d019411,Zm00001d019413	B73	Nonsyntenic	Private	PH207_Cluster_1018	2.50156
B73_Cluster_0583	Zm00001d019549,Zm00001d019550	B73	Maize1	Private	NA	0.718826
B73_Cluster_0584	Zm00001d019557,Zm00001d019560	B73	Maize1	Shared	PH207_Cluster_1019	3.95032
B73_Cluster_0585	Zm00001d019563,Zm00001d019565	B73	Maize1	Shared	PH207_Cluster_1020	11.717
B73_Cluster_0586	Zm00001d019678,Zm00001d019680	B73	Nonsyntenic	Private	NA	0.0113226
B73_Cluster_0587	Zm00001d019704,Zm00001d019705	B73	Maize1	Private	NA	6.16088
B73_Cluster_0588	Zm00001d019725,Zm00001d019726	B73	Maize1	Shared	PH207_Cluster_1024	11.7236
B73_Cluster_0589	Zm00001d019734,Zm00001d019744	B73	Maize1	Shared	PH207_Cluster_1025	11.7058
B73_Cluster_0590	Zm00001d019756,Zm00001d019757	B73	Maize1	Private	NA	11.7765
B73_Cluster_0591	Zm00001d019761,Zm00001d019762	B73	Nonsyntenic	Shared	PH207_Cluster_1026	11.7956
B73_Cluster_0592	Zm00001d019854,Zm00001d019863	B73	Nonsyntenic	NA	NA	NA
B73_Cluster_0593	Zm00001d019951,Zm00001d019961	B73	Nonsyntenic	Private	NA	11.7191
B73_Cluster_0594	Zm00001d020019,Zm00001d020020	B73	Maize1	Private	NA	11.8112
B73_Cluster_0595	Zm00001d020112,Zm00001d020117	B73	Maize1	Shared	PH207_Cluster_1029	8.86869
B73_Cluster_0596	Zm00001d020136,Zm00001d020137	B73	Maize1	Private	NA	0.000895726
B73_Cluster_0597	Zm00001d020183,Zm00001d020185	B73	Maize1	Shared	PH207_Cluster_1031	11.7295
B73_Cluster_0598	Zm00001d020250,Zm00001d020251	B73	Maize1	Shared	PH207_Cluster_1032	11.7352
B73_Cluster_0599	Zm00001d020260,Zm00001d020261	B73	Maize1	Shared	PH207_Cluster_1033	11.7223
B73_Cluster_0600	Zm00001d020265,Zm00001d020266	B73	Maize1	Shared	PH207_Cluster_1038	11.7239
B73_Cluster_0601	Zm00001d020277,Zm00001d020279,Zm00001d020280,Zm00001d020281,Zm00001d020282	B73	Maize1	Shared	PH207_Cluster_1039	11.7236312675,11.7236312675,0.714901035396,4.61173190512
B73_Cluster_0602	Zm00001d020306,Zm00001d020307	B73	Maize1	Shared	PH207_Cluster_1040	11.8394
B73_Cluster_0603	Zm00001d020350,Zm00001d020351	B73	Maize1	Private	NA	0.239512
B73_Cluster_0604	Zm00001d020400,Zm00001d020401	B73	Maize1	Shared	PH207_Cluster_1041	11.7409
B73_Cluster_0605	Zm00001d020405,Zm00001d020408	B73	Maize1	Shared	PH207_Cluster_1042	10.4504
B73_Cluster_0606	Zm00001d020468,Zm00001d020475,Zm00001d020483	B73	Nonsyntenic	Private	NA	11.7293568028,0.236891630133
B73_Cluster_0607	Zm00001d020472,Zm00001d020476	B73	Maize1	Private	NA	3.78742
B73_Cluster_0608	Zm00001d020480,Zm00001d020484	B73	Nonsyntenic	Shared	PH207_Cluster_1043	0.577282
B73_Cluster_0609	Zm00001d020492,Zm00001d020495	B73	Maize1	Shared	PH207_Cluster_1044	11.7272
B73_Cluster_0610	Zm00001d020496,Zm00001d020497	B73	Maize1	Shared	PH207_Cluster_1045	11.7177
B73_Cluster_0611	Zm00001d020501,Zm00001d020502	B73	Maize1	Shared	PH207_Cluster_1046	6.98846
B73_Cluster_0612	Zm00001d020503,Zm00001d020504	B73	Maize1	Private	NA	11.5315
B73_Cluster_0613	Zm00001d020521,Zm00001d020524	B73	Maize1	Shared	PH207_Cluster_1048	5.26937
B73_Cluster_0614	Zm00001d020528,Zm00001d020530	B73	Maize1	Shared	PH207_Cluster_1049	11.7621
B73_Cluster_0615	Zm00001d020550,Zm00001d020551	B73	Maize1	Private	NA	11.8059
B73_Cluster_0616	Zm00001d020555,Zm00001d020556	B73	Maize1	Shared	PH207_Cluster_1051	0.214584
B73_Cluster_0617	Zm00001d020563,Zm00001d020568	B73	Maize1	Shared	PH207_Cluster_1052	11.7111
B73_Cluster_0618	Zm00001d020573,Zm00001d020574,Zm00001d020575,Zm00001d020577	B73	Maize1	Private	NA	0.00363737224917,0.00282814024965,11.8181699657
B73_Cluster_0619	Zm00001d020584,Zm00001d020585	B73	Maize1	Shared	PH207_Cluster_1053	5.7232
B73_Cluster_0620	Zm00001d020591,Zm00001d020592	B73	Maize1	Private	NA	11.0447
B73_Cluster_0621	Zm00001d020605,Zm00001d020606	B73	Maize1	Private	NA	11.7266
B73_Cluster_0622	Zm00001d020651,Zm00001d020652	B73	Maize1	Shared	PH207_Cluster_1054	11.8181
B73_Cluster_0623	Zm00001d020727,Zm00001d020728	B73	Maize1	Shared	PH207_Cluster_1058	2.34337
B73_Cluster_0624	Zm00001d020732,Zm00001d020735,Zm00001d020736,Zm00001d020737,Zm00001d020738,Zm00001d020740,Zm00001d020741,Zm00001d020742,Zm00001d020744	B73	Maize1	Shared	PH207_Cluster_1059	2.67415422062,8.03814664993,8.03814664993,1.02627891311,3.91745599118,11.7195913394,11.7195913394,1.21530801963
B73_Cluster_0625	Zm00001d020746,Zm00001d020747	B73	Maize1	Private	NA	11.8405
B73_Cluster_0626	Zm00001d020750,Zm00001d020751,Zm00001d020752,Zm00001d020754	B73	Maize1	Shared	PH207_Cluster_1060	3.82460123604,9.32983058962,9.32983058962
B73_Cluster_0627	Zm00001d020789,Zm00001d020791	B73	Maize1	Private	NA	11.7346
B73_Cluster_0628	Zm00001d020793,Zm00001d020794	B73	Maize1	Private	NA	11.7311
B73_Cluster_0629	Zm00001d020804,Zm00001d020805	B73	Maize1	Private	NA	4.04053
B73_Cluster_0630	Zm00001d020839,Zm00001d020840	B73	Maize1	Private	NA	11.7248
B73_Cluster_0631	Zm00001d020863,Zm00001d020864	B73	Maize1	Shared	PH207_Cluster_1062	7.58122
B73_Cluster_0632	Zm00001d020886,Zm00001d020887	B73	Maize1	Private	NA	11.7318
B73_Cluster_0633	Zm00001d020957,Zm00001d020958,Zm00001d020961	B73	Maize1	Shared	PH207_Cluster_1063	4.81371337522,1.56687785899
B73_Cluster_0634	Zm00001d020967,Zm00001d020968	B73	Maize1	Private	NA	11.7262
B73_Cluster_0635	Zm00001d021016,Zm00001d021017	B73	Maize1	Private	NA	11.7397
B73_Cluster_0636	Zm00001d021018,Zm00001d021020	B73	Maize1	Shared	PH207_Cluster_1065	4.64681
B73_Cluster_0637	Zm00001d021047,Zm00001d021048	B73	Maize1	Shared	PH207_Cluster_1064	0.754608
B73_Cluster_0638	Zm00001d021093,Zm00001d021094,Zm00001d021095	B73	Maize1	Shared	PH207_Cluster_1057	11.7211238322,7.53974790532
B73_Cluster_0639	Zm00001d021097,Zm00001d021099,Zm00001d021103,Zm00001d021107,Zm00001d021115,Zm00001d021117	B73	Nonsyntenic	Shared	PH207_Cluster_1066	7.93219644789,3.83840986162,3.83840986162,0.984934073926,11.7170173085
B73_Cluster_0640	Zm00001d021167,Zm00001d021168	B73	Maize1	Shared	PH207_Cluster_1067	0.100866
B73_Cluster_0641	Zm00001d021189,Zm00001d021191	B73	Maize1	Private	NA	8.47001
B73_Cluster_0642	Zm00001d021205,Zm00001d021207,Zm00001d021208,Zm00001d021214	B73	Maize1	Private	NA	10.8700610572,6.51095601134,11.7219739371
B73_Cluster_0643	Zm00001d021250,Zm00001d021251	B73	Nonsyntenic	Private	NA	11.7571
B73_Cluster_0644	Zm00001d021285,Zm00001d021290	B73	Maize1	Shared	PH207_Cluster_1069	11.7205
B73_Cluster_0645	Zm00001d021321,Zm00001d021324,Zm00001d021329	B73	Nonsyntenic	Private	NA	0.0357036245405,11.8874664941
B73_Cluster_0646	Zm00001d021423,Zm00001d021424	B73	Maize1	Shared	PH207_Cluster_1070	5.05373
B73_Cluster_0647	Zm00001d021454,Zm00001d021455,Zm00001d021456,Zm00001d021457,Zm00001d021459	B73	Maize1	Shared	PH207_Cluster_1071	3.39857851997,11.7321598874,10.4152900313,10.4152900313
B73_Cluster_0648	Zm00001d021484,Zm00001d021485	B73	Maize1	Private	NA	0.198756
B73_Cluster_0649	Zm00001d021491,Zm00001d021492	B73	Maize1	Shared	PH207_Cluster_1073	9.34707
B73_Cluster_0650	Zm00001d021508,Zm00001d021511	B73	Maize1	Shared	PH207_Cluster_1074	0.547212
B73_Cluster_0651	Zm00001d021571,Zm00001d021572,Zm00001d021576,Zm00001d021577	B73	Maize1	Private	PH207_Cluster_1076	11.4065467262,8.61212210271,6.64092860888
B73_Cluster_0652	Zm00001d021602,Zm00001d021605	B73	Maize1	Private	NA	11.8292
B73_Cluster_0653	Zm00001d021630,Zm00001d021632	B73	Maize1	Shared	PH207_Cluster_1077	11.7254
B73_Cluster_0654	Zm00001d021655,Zm00001d021656	B73	Maize1	Shared	PH207_Cluster_1078	11.743
B73_Cluster_0655	Zm00001d021682,Zm00001d021683,Zm00001d021684,Zm00001d021686,Zm00001d021688,Zm00001d021689,Zm00001d021692,Zm00001d021693,Zm00001d021696,Zm00001d021698,Zm00001d021699	B73	Maize1	Shared	PH207_Cluster_1079	11.3731531474,3.4755765144,11.3731531474,9.06972330504,9.06972330504,1.13912972905,11.7226679784,11.7226679784,10.9439226059,10.9439226059
B73_Cluster_0656	Zm00001d021690,Zm00001d021695,Zm00001d021697	B73	Maize1	Shared	PH207_Cluster_1080	0.80237481886,11.7057261519
B73_Cluster_0657	Zm00001d021706,Zm00001d021707	B73	Maize1	Shared	PH207_Cluster_1081	3.71032
B73_Cluster_0658	Zm00001d021726,Zm00001d021727,Zm00001d021729,Zm00001d021737	B73	Maize1	Shared	PH207_Cluster_1083	9.84160075026,9.84160075026,7.81132347793
B73_Cluster_0659	Zm00001d021731,Zm00001d021732,Zm00001d021736	B73	Maize1	Shared	PH207_Cluster_1084	11.7290325691,11.7290325691
B73_Cluster_0660	Zm00001d021733,Zm00001d021734	B73	Nonsyntenic	Shared	PH207_Cluster_1085	9.13311
B73_Cluster_0661	Zm00001d021740,Zm00001d021744	B73	Maize1	Shared	PH207_Cluster_1082	11.7288
B73_Cluster_0662	Zm00001d021747,Zm00001d021752,Zm00001d021753	B73	Nonsyntenic	Shared	PH207_Cluster_1086	11.7300330248,6.2373436077
B73_Cluster_0663	Zm00001d021755,Zm00001d021757	B73	Maize1	Shared	PH207_Cluster_1087	11.7307
B73_Cluster_0664	Zm00001d021772,Zm00001d021773	B73	Maize1	Private	NA	11.8253
B73_Cluster_0665	Zm00001d021864,Zm00001d021867	B73	Maize1	Private	NA	11.7454
B73_Cluster_0666	Zm00001d021866,Zm00001d021868	B73	Maize1	Shared	PH207_Cluster_1089	11.7199
B73_Cluster_0667	Zm00001d021896,Zm00001d021897	B73	Maize1	Shared	PH207_Cluster_1090	11.7452
B73_Cluster_0668	Zm00001d021935,Zm00001d021936,Zm00001d021938,Zm00001d021942,Zm00001d021943	B73	Maize1	Shared	PH207_Cluster_1091	11.7237903266,11.7237903266,9.16049411864,9.16049411864
B73_Cluster_0669	Zm00001d021951,Zm00001d021952	B73	Maize1	Private	NA	11.765
B73_Cluster_0670	Zm00001d021990,Zm00001d021992	B73	Maize1	Shared	PH207_Cluster_1092	0.192217
B73_Cluster_0671	Zm00001d021991,Zm00001d021993	B73	Maize1	Private	NA	0.0949146
B73_Cluster_0672	Zm00001d022035,Zm00001d022036	B73	Nonsyntenic	Shared	PH207_Cluster_1093	0.00170308
B73_Cluster_0673	Zm00001d022053,Zm00001d022055,Zm00001d022057	B73	Maize1	Private	NA	3.00354973698,11.7175414632
B73_Cluster_0674	Zm00001d022081,Zm00001d022082	B73	Maize1	Shared	PH207_Cluster_1094	0.00389976
B73_Cluster_0675	Zm00001d022089,Zm00001d022090	B73	Maize1	Shared	PH207_Cluster_1095	11.7393
B73_Cluster_0676	Zm00001d022117,Zm00001d022120	B73	Maize1	Private	NA	11.7118
B73_Cluster_0677	Zm00001d022119,Zm00001d022122	B73	Maize1	Private	NA	0.186165
B73_Cluster_0678	Zm00001d022192,Zm00001d022193	B73	Maize1	Shared	PH207_Cluster_1101	3.49147
B73_Cluster_0679	Zm00001d022216,Zm00001d022221	B73	Maize1	Private	NA	11.8092
B73_Cluster_0680	Zm00001d022217,Zm00001d022222	B73	Maize1	Private	NA	3.66058
B73_Cluster_0681	Zm00001d022218,Zm00001d022223	B73	Maize1	Private	NA	4.02696
B73_Cluster_0682	Zm00001d022268,Zm00001d022269	B73	Nonsyntenic	Private	NA	11.7133
B73_Cluster_0683	Zm00001d022270,Zm00001d022271	B73	Maize1	Private	NA	11.774
B73_Cluster_0684	Zm00001d022279,Zm00001d022280,Zm00001d022281,Zm00001d022282,Zm00001d022283,Zm00001d022284,Zm00001d022289,Zm00001d022290	B73	Maize1	Shared	PH207_Cluster_1102	11.7311106345,11.7311106345,2.7438548967,9.02929530129,11.7311106345,11.7311106345,9.02929530129
B73_Cluster_0685	Zm00001d022317,Zm00001d022320,Zm00001d022323,Zm00001d022326,Zm00001d022327	B73	Maize1	Shared	PH207_Cluster_1103	3.36704588771,11.7079165638,4.85490402214,3.19996552685
B73_Cluster_0686	Zm00001d022343,Zm00001d022344,Zm00001d022346	B73	Nonsyntenic	Private	NA	3.85365770053,11.723948485
B73_Cluster_0687	Zm00001d022356,Zm00001d022360	B73	Maize1	Private	NA	11.7033
B73_Cluster_0688	Zm00001d022357,Zm00001d022361	B73	Maize1	Private	NA	0.0070378
B73_Cluster_0689	Zm00001d022420,Zm00001d022421	B73	Maize1	Shared	PH207_Cluster_1107	11.7364
B73_Cluster_0690	Zm00001d022450,Zm00001d022451	B73	Maize1	Shared	PH207_Cluster_1105	6.43415
B73_Cluster_0691	Zm00001d022453,Zm00001d022456,Zm00001d022457,Zm00001d022458	B73	Maize1	Shared	PH207_Cluster_1104	10.4256968372,9.17841605874,9.17841605874
B73_Cluster_0692	Zm00001d022471,Zm00001d022472	B73	Maize1	Private	NA	11.759
B73_Cluster_0693	Zm00001d022555,Zm00001d022556	B73	Nonsyntenic	NA	NA	NA
B73_Cluster_0694	Zm00001d022617,Zm00001d022618	B73	Maize1	Private	NA	11.7287
B73_Cluster_0695	Zm00001d022637,Zm00001d022643	B73	Maize1	Private	NA	2.26083
B73_Cluster_0696	Zm00001d023210,Zm00001d023213	B73	Nonsyntenic	Private	PH207_Cluster_1321	11.73
B73_Cluster_0697	Zm00001d023215,Zm00001d023216	B73	Nonsyntenic	Shared	PH207_Cluster_1322	6.51354
B73_Cluster_0698	Zm00001d023217,Zm00001d023225	B73	Maize1	Shared	PH207_Cluster_1323	1.96332
B73_Cluster_0699	Zm00001d023227,Zm00001d023228	B73	Maize1	Shared	PH207_Cluster_1324	11.7275
B73_Cluster_0700	Zm00001d023247,Zm00001d023248	B73	Maize1	Shared	PH207_Cluster_1325	11.7221
B73_Cluster_0701	Zm00001d023254,Zm00001d023257	B73	Maize1	Private	NA	11.8142
B73_Cluster_0702	Zm00001d023265,Zm00001d023267	B73	Nonsyntenic	Shared	PH207_Cluster_1326	3.81556
B73_Cluster_0703	Zm00001d023282,Zm00001d023284,Zm00001d023287	B73	Maize1	Shared	PH207_Cluster_1327	11.7152044255,0.641119494172
B73_Cluster_0704	Zm00001d023285,Zm00001d023286,Zm00001d023288,Zm00001d023289	B73	Maize1	Private	NA	5.7201315848,5.7201315848,5.7201315848
B73_Cluster_0705	Zm00001d023303,Zm00001d023304	B73	Maize1	Private	NA	11.7395
B73_Cluster_0706	Zm00001d023313,Zm00001d023314	B73	Maize1	Private	NA	4.1811
B73_Cluster_0707	Zm00001d023317,Zm00001d023318,Zm00001d023320,Zm00001d023321,Zm00001d023322,Zm00001d023323,Zm00001d023325,Zm00001d023326,Zm00001d023327,Zm00001d023329,Zm00001d023330	B73	Maize1	Shared	PH207_Cluster_1331	0.256090951422,0.224020310982,0.468573433767,0.468573433767,11.7124908906,11.7124908906,0.468573433767,0.0397546093958,0.223429515128,0.360795271099
B73_Cluster_0708	Zm00001d023337,Zm00001d023339	B73	Maize1	Private	NA	9.52476
B73_Cluster_0709	Zm00001d023343,Zm00001d023345	B73	Maize1	Private	NA	5.4319
B73_Cluster_0710	Zm00001d023347,Zm00001d023349	B73	Maize1	Private	NA	11.7399
B73_Cluster_0711	Zm00001d023353,Zm00001d023360,Zm00001d023365	B73	Maize1	Shared	PH207_Cluster_1334	6.30374114139,11.7201546543
B73_Cluster_0712	Zm00001d023384,Zm00001d023385	B73	Maize1	Private	PH207_Cluster_1335	11.7828
B73_Cluster_0713	Zm00001d023398,Zm00001d023399,Zm00001d023417,Zm00001d023418	B73	Maize1	Shared	PH207_Cluster_1336	11.7161404982,0.45884795796,11.7161404982
B73_Cluster_0714	Zm00001d023400,Zm00001d023413	B73	Maize1	Shared	PH207_Cluster_1337	11.7273
B73_Cluster_0715	Zm00001d023401,Zm00001d023406,Zm00001d023412	B73	Nonsyntenic	NA	NA	NA
B73_Cluster_0716	Zm00001d023402,Zm00001d023411	B73	Maize1	Shared	PH207_Cluster_1338	0.340463
B73_Cluster_0717	Zm00001d023404,Zm00001d023410	B73	Maize1	Shared	PH207_Cluster_1339	1.89073
B73_Cluster_0718	Zm00001d023405,Zm00001d023409	B73	Maize1	Shared	PH207_Cluster_1340	11.7633
B73_Cluster_0719	Zm00001d023455,Zm00001d023456	B73	Maize1	Private	NA	11.8378
B73_Cluster_0720	Zm00001d023469,Zm00001d023472	B73	Maize1	Shared	PH207_Cluster_1342	11.7293
B73_Cluster_0721	Zm00001d023474,Zm00001d023475	B73	Nonsyntenic	NA	NA	NA
B73_Cluster_0722	Zm00001d023481,Zm00001d023483,Zm00001d023484,Zm00001d023485,Zm00001d023486,Zm00001d023487,Zm00001d023489,Zm00001d023490,Zm00001d023491,Zm00001d023493	B73	Nonsyntenic	NA	NA	NA
B73_Cluster_0723	Zm00001d023492,Zm00001d023494	B73	Maize1	Shared	PH207_Cluster_1343	8.59698
B73_Cluster_0724	Zm00001d023498,Zm00001d023499	B73	Maize1	Shared	PH207_Cluster_1344	11.7391
B73_Cluster_0725	Zm00001d023504,Zm00001d023506	B73	Maize1	Shared	PH207_Cluster_1345	0.386961
B73_Cluster_0726	Zm00001d023539,Zm00001d023541	B73	Maize1	Private	PH207_Cluster_1348	11.7351
B73_Cluster_0727	Zm00001d023548,Zm00001d023554	B73	Maize1	Shared	PH207_Cluster_1349	0.643974
B73_Cluster_0728	Zm00001d023569,Zm00001d023570,Zm00001d023575	B73	Maize1	Private	NA	11.7298093703,7.73125891248
B73_Cluster_0729	Zm00001d023592,Zm00001d023593,Zm00001d023596,Zm00001d023603	B73	Maize1	Shared	PH207_Cluster_1352	0.636963543883,0.636963543883,11.7189708111
B73_Cluster_0730	Zm00001d023615,Zm00001d023616	B73	Maize1	Private	NA	0.00121365
B73_Cluster_0731	Zm00001d023673,Zm00001d023677	B73	Maize1	Shared	PH207_Cluster_1355	11.7313
B73_Cluster_0732	Zm00001d023695,Zm00001d023698	B73	Maize1	Shared	PH207_Cluster_1356	9.42775
B73_Cluster_0733	Zm00001d023721,Zm00001d023722,Zm00001d023723,Zm00001d023728	B73	Maize1	Shared	PH207_Cluster_1357	11.7089643394,3.00599900554,0.618568952094
B73_Cluster_0734	Zm00001d023768,Zm00001d023769	B73	Nonsyntenic	Shared	PH207_Cluster_1358	11.7146
B73_Cluster_0735	Zm00001d023799,Zm00001d023800	B73	Maize1	Private	NA	11.8137
B73_Cluster_0736	Zm00001d023869,Zm00001d023870,Zm00001d023872,Zm00001d023873	B73	Maize1	Private	NA	10.0879623835,10.0879623835,11.7349952922
B73_Cluster_0737	Zm00001d023889,Zm00001d023890	B73	Nonsyntenic	NA	NA	NA
B73_Cluster_0738	Zm00001d023903,Zm00001d023905,Zm00001d023906	B73	Maize1	Shared	PH207_Cluster_1361	0.999798559534,11.7270583373
B73_Cluster_0739	Zm00001d023904,Zm00001d023908	B73	Maize1	Private	NA	6.84571
B73_Cluster_0740	Zm00001d023939,Zm00001d023941	B73	Maize1	Shared	PH207_Cluster_1362	11.7208
B73_Cluster_0741	Zm00001d024017,Zm00001d024018	B73	Nonsyntenic	Private	PH207_Cluster_1364	11.8118
B73_Cluster_0742	Zm00001d024207,Zm00001d024208,Zm00001d024210,Zm00001d024211	B73	Nonsyntenic	Shared	PH207_Cluster_1366	6.41041106711,4.54719551146,6.41041106711
B73_Cluster_0743	Zm00001d024252,Zm00001d024265	B73	Maize1	Shared	PH207_Cluster_1368	11.7172
B73_Cluster_0744	Zm00001d024302,Zm00001d024303	B73	Maize1	Shared	PH207_Cluster_1369	11.7548
B73_Cluster_0745	Zm00001d024349,Zm00001d024351	B73	Maize1	Shared	PH207_Cluster_1370	11.7211
B73_Cluster_0746	Zm00001d024378,Zm00001d024379,Zm00001d024382,Zm00001d024386,Zm00001d024392	B73	Maize1	Shared	PH207_Cluster_1371	11.7230401493,11.7230401493,0.472446355396,11.7230401493
B73_Cluster_0747	Zm00001d024447,Zm00001d024454,Zm00001d024458	B73	Maize1	Private	NA	4.1857848273,11.7413875885
B73_Cluster_0748	Zm00001d024477,Zm00001d024478,Zm00001d024479,Zm00001d024481,Zm00001d024486	B73	Maize1	Private	NA	6.18559419001,0.463293027793,0.0560534560775,11.7426558026
B73_Cluster_0749	Zm00001d024548,Zm00001d024549	B73	Maize1	Private	NA	11.7665
B73_Cluster_0750	Zm00001d024554,Zm00001d024558,Zm00001d024559,Zm00001d024562,Zm00001d024565	B73	Nonsyntenic	Private	NA	0.12841270669,0.0620563534104,0.177918554506,0.177918554506
B73_Cluster_0751	Zm00001d024594,Zm00001d024595	B73	Maize1	Private	NA	0.139575
B73_Cluster_0752	Zm00001d024607,Zm00001d024610,Zm00001d024611	B73	Maize1	Private	NA	11.7604154646,9.05384919727
B73_Cluster_0753	Zm00001d024615,Zm00001d024617,Zm00001d024619,Zm00001d024620	B73	Maize1	Private	NA	0.0822201399129,11.7113498079,11.7113498079
B73_Cluster_0754	Zm00001d024627,Zm00001d024628	B73	Maize1	Private	NA	11.7472
B73_Cluster_0755	Zm00001d024651,Zm00001d024653,Zm00001d024657	B73	Nonsyntenic	Shared	PH207_Cluster_1373	8.67689093689,11.7444022724
B73_Cluster_0756	Zm00001d024664,Zm00001d024665	B73	Maize1	Shared	PH207_Cluster_1374	11.745
B73_Cluster_0757	Zm00001d024667,Zm00001d024669	B73	Maize1	Private	NA	2.26408
B73_Cluster_0758	Zm00001d024693,Zm00001d024694,Zm00001d024695,Zm00001d024697	B73	Maize1	Shared	PH207_Cluster_1375	11.7321661933,10.5654677925,11.2624115321
B73_Cluster_0759	Zm00001d024725,Zm00001d024726	B73	Maize1	Shared	PH207_Cluster_1376	8.6051
B73_Cluster_0760	Zm00001d024734,Zm00001d024735,Zm00001d024738,Zm00001d024740	B73	Maize1	Shared	PH207_Cluster_1377	10.3417140004,11.2781824734,11.2781824734
B73_Cluster_0761	Zm00001d024745,Zm00001d024749,Zm00001d024750,Zm00001d024751,Zm00001d024752,Zm00001d024753	B73	Maize1	Shared	PH207_Cluster_1377	2.1399462447,3.27256191804,3.27256191804,4.73900357778,11.7232972388
B73_Cluster_0762	Zm00001d024759,Zm00001d024760,Zm00001d024761	B73	Maize1	Shared	PH207_Cluster_1378	8.49215524106,0.387199466897
B73_Cluster_0763	Zm00001d024770,Zm00001d024771	B73	Maize1	Shared	PH207_Cluster_1379	11.7228
B73_Cluster_0764	Zm00001d024798,Zm00001d024799,Zm00001d024800,Zm00001d024802	B73	Maize1	Shared	PH207_Cluster_1380	4.91958290127,6.92578630611,11.7404934305
B73_Cluster_0765	Zm00001d024809,Zm00001d024810,Zm00001d024814	B73	Maize1	Shared	PH207_Cluster_1381	8.93775109821,0.973077525715
B73_Cluster_0766	Zm00001d024843,Zm00001d024850,Zm00001d024851,Zm00001d024852,Zm00001d024853	B73	Maize1	Shared	PH207_Cluster_1382	11.6983782966,0.175463957693,7.62108014144,11.6983782966
B73_Cluster_0767	Zm00001d024867,Zm00001d024871	B73	Nonsyntenic	Shared	PH207_Cluster_1383	11.7287
B73_Cluster_0768	Zm00001d024897,Zm00001d024900	B73	Maize2	Private	NA	11.8046
B73_Cluster_0769	Zm00001d024906,Zm00001d024907	B73	Maize2	Shared	PH207_Cluster_1384	1.18111
B73_Cluster_0770	Zm00001d024943,Zm00001d024946	B73	Maize2	Shared	PH207_Cluster_1388	11.734
B73_Cluster_0771	Zm00001d024956,Zm00001d024957	B73	Nonsyntenic	NA	NA	NA
B73_Cluster_0772	Zm00001d024958,Zm00001d024959	B73	Nonsyntenic	NA	NA	NA
B73_Cluster_0773	Zm00001d024961,Zm00001d024962	B73	Nonsyntenic	Shared	PH207_Cluster_1389	11.8885
B73_Cluster_0774	Zm00001d024978,Zm00001d024979	B73	Nonsyntenic	Private	NA	11.7379
B73_Cluster_0775	Zm00001d024981,Zm00001d024982	B73	Nonsyntenic	Shared	PH207_Cluster_1390	11.7186
B73_Cluster_0776	Zm00001d025019,Zm00001d025022	B73	Maize2	Shared	PH207_Cluster_1392	11.7273
B73_Cluster_0777	Zm00001d025036,Zm00001d025037	B73	Maize2	Shared	PH207_Cluster_1393	0.546736
B73_Cluster_0778	Zm00001d025145,Zm00001d025146	B73	Nonsyntenic	NA	NA	NA
B73_Cluster_0779	Zm00001d025185,Zm00001d025193	B73	Maize2	Shared	PH207_Cluster_1395	2.80983
B73_Cluster_0780	Zm00001d025225,Zm00001d025226	B73	Maize2	Private	NA	11.7623
B73_Cluster_0781	Zm00001d025253,Zm00001d025255	B73	Maize2	Shared	PH207_Cluster_1397	11.723
B73_Cluster_0782	Zm00001d025265,Zm00001d025267	B73	Maize2	Private	NA	8.17826
B73_Cluster_0783	Zm00001d025310,Zm00001d025319	B73	Maize2	Private	NA	5.47402
B73_Cluster_0784	Zm00001d025354,Zm00001d025355	B73	Maize2	Shared	PH207_Cluster_1398	11.7077
B73_Cluster_0785	Zm00001d025381,Zm00001d025382	B73	Maize2	Private	NA	0.289924
B73_Cluster_0786	Zm00001d025383,Zm00001d025388,Zm00001d025390,Zm00001d025391,Zm00001d025393,Zm00001d025394,Zm00001d025396	B73	Maize2	Shared	PH207_Cluster_1399	2.32603017893,11.7311648414,1.64194761635,0.240387776108,1.64194761635,1.64194761635
B73_Cluster_0787	Zm00001d025389,Zm00001d025392,Zm00001d025395,Zm00001d025397	B73	Maize2	Private	NA	0.18577586856,0.0759714094404,11.7410541457
B73_Cluster_0788	Zm00001d025491,Zm00001d025504	B73	Maize2	Shared	PH207_Cluster_1401	0.312275
B73_Cluster_0789	Zm00001d025496,Zm00001d025500	B73	Nonsyntenic	NA	NA	NA
B73_Cluster_0790	Zm00001d025528,Zm00001d025533	B73	Maize2	Shared	PH207_Cluster_1402	0.0133437
B73_Cluster_0791	Zm00001d025552,Zm00001d025558	B73	Nonsyntenic	NA	NA	NA
B73_Cluster_0792	Zm00001d025554,Zm00001d025556,Zm00001d025561,Zm00001d025565	B73	Nonsyntenic	Private	NA	11.9011612873,11.9011612873,11.9011612873
B73_Cluster_0793	Zm00001d025572,Zm00001d025573	B73	Maize2	Shared	PH207_Cluster_1404	1.28819
B73_Cluster_0794	Zm00001d025584,Zm00001d025585	B73	Maize2	Shared	PH207_Cluster_1405	1.3968
B73_Cluster_0795	Zm00001d025592,Zm00001d025596,Zm00001d025597,Zm00001d025598,Zm00001d025603,Zm00001d025605,Zm00001d025606,Zm00001d025609,Zm00001d025611	B73	Maize2	Shared	PH207_Cluster_1407	9.05397080466,9.05397080466,8.44490764478,8.44490764478,8.44490764478,1.7116906798,9.05397080466,9.05397080466
B73_Cluster_0796	Zm00001d025593,Zm00001d025599,Zm00001d025607	B73	Maize2	Shared	PH207_Cluster_1406	0.481749870822,6.22912782361
B73_Cluster_0797	Zm00001d025594,Zm00001d025600,Zm00001d025602	B73	Nonsyntenic	NA	NA	NA
B73_Cluster_0798	Zm00001d025604,Zm00001d025610	B73	Nonsyntenic	Shared	PH207_Cluster_1408	11.7201
B73_Cluster_0799	Zm00001d025629,Zm00001d025633	B73	Maize2	Private	NA	0.00110262
B73_Cluster_0800	Zm00001d025632,Zm00001d025636	B73	Nonsyntenic	Private	NA	0.0456621
B73_Cluster_0801	Zm00001d025685,Zm00001d025686	B73	Nonsyntenic	NA	NA	NA
B73_Cluster_0802	Zm00001d025741,Zm00001d025744	B73	Maize2	Private	NA	11.7411
B73_Cluster_0803	Zm00001d025808,Zm00001d025812	B73	Maize2	Private	NA	4.45239
B73_Cluster_0804	Zm00001d025835,Zm00001d025836	B73	Nonsyntenic	NA	NA	NA
B73_Cluster_0805	Zm00001d025846,Zm00001d025847	B73	Maize2	Shared	PH207_Cluster_1410	6.34832
B73_Cluster_0806	Zm00001d025875,Zm00001d025881	B73	Nonsyntenic	Private	NA	11.72
B73_Cluster_0807	Zm00001d025877,Zm00001d025878,Zm00001d025884	B73	Nonsyntenic	Shared	PH207_Cluster_1411	11.7209671398,11.7209671398
B73_Cluster_0808	Zm00001d025887,Zm00001d025888,Zm00001d025889	B73	Maize2	Private	NA	7.16390686489,7.16390686489
B73_Cluster_0809	Zm00001d025900,Zm00001d025901	B73	Maize2	Private	NA	6.45909
B73_Cluster_0810	Zm00001d025920,Zm00001d025921	B73	Maize2	Private	NA	11.7394
B73_Cluster_0811	Zm00001d025922,Zm00001d025923,Zm00001d025924	B73	Maize2	Private	NA	10.7320561765,10.7320561765
B73_Cluster_0812	Zm00001d026026,Zm00001d026028,Zm00001d026029	B73	Maize2	Shared	PH207_Cluster_1414	6.98918840338,6.98918840338
B73_Cluster_0813	Zm00001d026133,Zm00001d026134	B73	Maize2	Shared	PH207_Cluster_1415	11.734
B73_Cluster_0814	Zm00001d026160,Zm00001d026162,Zm00001d026163	B73	Maize2	Shared	PH207_Cluster_1416	11.7250553716,4.28625908263
B73_Cluster_0815	Zm00001d026169,Zm00001d026170,Zm00001d026171	B73	Maize2	Shared	PH207_Cluster_1418	1.30093291867,11.7215710004
B73_Cluster_0816	Zm00001d026177,Zm00001d026178	B73	Maize2	Shared	PH207_Cluster_1419	6.31925
B73_Cluster_0817	Zm00001d026182,Zm00001d026184,Zm00001d026191	B73	Maize2	Shared	PH207_Cluster_1420	9.44549592109,9.44549592109
B73_Cluster_0818	Zm00001d026197,Zm00001d026203,Zm00001d026204	B73	Maize2	Private	NA	7.86967660096,7.86967660096
B73_Cluster_0819	Zm00001d026225,Zm00001d026226	B73	Nonsyntenic	Private	NA	11.7234
B73_Cluster_0820	Zm00001d026250,Zm00001d026251	B73	Maize2	Shared	PH207_Cluster_1422	11.7387
B73_Cluster_0821	Zm00001d026369,Zm00001d026370,Zm00001d026371	B73	Maize2	Shared	PH207_Cluster_1424	0.781791780711,11.7357026711
B73_Cluster_0822	Zm00001d026382,Zm00001d026383	B73	Maize1	Private	NA	11.7345
B73_Cluster_0823	Zm00001d026406,Zm00001d026412,Zm00001d026413	B73	Maize2	Private	NA	0.00217647837463,0.00217647837463
B73_Cluster_0824	Zm00001d026408,Zm00001d026411	B73	Nonsyntenic	NA	NA	NA
B73_Cluster_0825	Zm00001d026454,Zm00001d026456,Zm00001d026457	B73	Maize2	Private	NA	2.57862030635,1.61479239966
B73_Cluster_0826	Zm00001d026488,Zm00001d026489	B73	Maize2	Private	NA	0.961937
B73_Cluster_0827	Zm00001d026522,Zm00001d026528	B73	Nonsyntenic	NA	NA	NA
B73_Cluster_0828	Zm00001d026557,Zm00001d026558	B73	Maize2	Private	NA	11.7774
B73_Cluster_0829	Zm00001d026588,Zm00001d026589	B73	Maize2	Shared	PH207_Cluster_1425	1.71617
B73_Cluster_0830	Zm00001d026661,Zm00001d026663	B73	Maize2	Shared	PH207_Cluster_1426	11.7217
B73_Cluster_0831	Zm00001d027281,Zm00001d027283	B73	Maize1	Shared	PH207_Cluster_0001	11.734
B73_Cluster_0832	Zm00001d027290,Zm00001d027291	B73	Maize1	Private	NA	11.827
B73_Cluster_0833	Zm00001d027488,Zm00001d027489	B73	Maize1	Private	NA	11.7602
B73_Cluster_0834	Zm00001d027508,Zm00001d027509	B73	Maize1	Shared	PH207_Cluster_0003	7.92899
B73_Cluster_0835	Zm00001d027524,Zm00001d027525	B73	Maize1	Private	NA	5.38086
B73_Cluster_0836	Zm00001d027534,Zm00001d027535	B73	Maize1	Shared	PH207_Cluster_0005	0.166065
B73_Cluster_0837	Zm00001d027539,Zm00001d027540,Zm00001d027541,Zm00001d027542	B73	Maize1	Shared	PH207_Cluster_0006	2.2939897281,2.62615727735,11.7341634175
B73_Cluster_0838	Zm00001d027570,Zm00001d027571,Zm00001d027572	B73	Maize1	Shared	PH207_Cluster_0008	1.28149968483,11.7272517699
B73_Cluster_0839	Zm00001d027578,Zm00001d027580	B73	Maize1	Private	NA	4.21554
B73_Cluster_0840	Zm00001d027599,Zm00001d027601	B73	Maize1	Shared	PH207_Cluster_0009	11.7312
B73_Cluster_0841	Zm00001d027610,Zm00001d027611	B73	Maize1	Shared	PH207_Cluster_0010	11.7228
B73_Cluster_0842	Zm00001d027621,Zm00001d027622	B73	Maize1	Shared	PH207_Cluster_0011	11.7181
B73_Cluster_0843	Zm00001d027638,Zm00001d027639,Zm00001d027642,Zm00001d027643	B73	Maize1	Shared	PH207_Cluster_0012	11.7184624831,11.7184624831,0.419827812512
B73_Cluster_0844	Zm00001d027678,Zm00001d027679	B73	Maize1	Shared	PH207_Cluster_0014	11.7381
B73_Cluster_0845	Zm00001d027684,Zm00001d027685	B73	Maize1	Shared	PH207_Cluster_0015	11.7316
B73_Cluster_0846	Zm00001d027686,Zm00001d027687	B73	Maize1	Private	NA	0.00569701
B73_Cluster_0847	Zm00001d027717,Zm00001d027718	B73	Maize1	Private	NA	7.59171
B73_Cluster_0848	Zm00001d027795,Zm00001d027797,Zm00001d027798	B73	Nonsyntenic	NA	NA	NA
B73_Cluster_0849	Zm00001d027819,Zm00001d027820,Zm00001d027821	B73	Maize1	Private	NA	11.718609281,4.20131260121
B73_Cluster_0850	Zm00001d027852,Zm00001d027853	B73	Maize1	Private	NA	2.56206
B73_Cluster_0851	Zm00001d027855,Zm00001d027859	B73	Maize1	Shared	PH207_Cluster_0016	11.8187
B73_Cluster_0852	Zm00001d027864,Zm00001d027866	B73	Maize1	Private	NA	11.7882
B73_Cluster_0853	Zm00001d027887,Zm00001d027888	B73	Maize1	Private	NA	10.4169
B73_Cluster_0854	Zm00001d027899,Zm00001d027900,Zm00001d027901	B73	Maize1	Shared	PH207_Cluster_0018	10.1787175378,11.7225445381
B73_Cluster_0855	Zm00001d027924,Zm00001d027925,Zm00001d027928,Zm00001d027929	B73	Nonsyntenic	Private	NA	11.7298588057,11.7298588057,3.2500915217
B73_Cluster_0856	Zm00001d027946,Zm00001d027948	B73	Maize1	Shared	PH207_Cluster_0020	0.751043
B73_Cluster_0857	Zm00001d027947,Zm00001d027949	B73	Nonsyntenic	Shared	PH207_Cluster_0021	5.20106
B73_Cluster_0858	Zm00001d027954,Zm00001d027956	B73	Maize1	Private	NA	11.733
B73_Cluster_0859	Zm00001d027955,Zm00001d027957	B73	Maize1	Private	NA	11.7362
B73_Cluster_0860	Zm00001d027978,Zm00001d027979	B73	Maize1	Shared	PH207_Cluster_0022	4.96575
B73_Cluster_0861	Zm00001d027995,Zm00001d027996	B73	Maize1	Shared	PH207_Cluster_0023	0.77011
B73_Cluster_0862	Zm00001d028002,Zm00001d028003	B73	Maize1	Private	NA	11.7308
B73_Cluster_0863	Zm00001d028008,Zm00001d028009	B73	Maize1	Shared	PH207_Cluster_0024	2.5936
B73_Cluster_0864	Zm00001d028062,Zm00001d028063	B73	Maize1	Private	NA	0.446368
B73_Cluster_0865	Zm00001d028069,Zm00001d028070	B73	Nonsyntenic	Shared	PH207_Cluster_0025	6.17337
B73_Cluster_0866	Zm00001d028144,Zm00001d028151	B73	Maize1	Shared	PH207_Cluster_0026	2.83021
B73_Cluster_0867	Zm00001d028162,Zm00001d028164	B73	Maize1	Shared	PH207_Cluster_0027	1.51482
B73_Cluster_0868	Zm00001d028249,Zm00001d028252	B73	Maize1	Shared	PH207_Cluster_0028	0.061073
B73_Cluster_0869	Zm00001d028312,Zm00001d028314,Zm00001d028315	B73	Maize1	Shared	PH207_Cluster_0029	4.13800008667,11.7293088159
B73_Cluster_0870	Zm00001d028347,Zm00001d028348,Zm00001d028349	B73	Maize1	Shared	PH207_Cluster_0031	11.7249409799,9.79520888161
B73_Cluster_0871	Zm00001d028354,Zm00001d028355	B73	Maize1	Shared	PH207_Cluster_0032	11.7299
B73_Cluster_0872	Zm00001d028356,Zm00001d028357	B73	Maize1	Shared	PH207_Cluster_0033	11.7355
B73_Cluster_0873	Zm00001d028367,Zm00001d028368	B73	Maize1	Shared	PH207_Cluster_0034	11.7495
B73_Cluster_0874	Zm00001d028399,Zm00001d028400	B73	Maize1	Private	NA	11.7454
B73_Cluster_0875	Zm00001d028454,Zm00001d028455	B73	Maize1	Private	NA	11.7396
B73_Cluster_0876	Zm00001d028465,Zm00001d028467,Zm00001d028469	B73	Maize1	Shared	PH207_Cluster_0035	11.7244140865,7.31358042211
B73_Cluster_0877	Zm00001d028495,Zm00001d028497	B73	Maize1	Shared	PH207_Cluster_0036	11.7626
B73_Cluster_0878	Zm00001d028519,Zm00001d028525	B73	Nonsyntenic	NA	NA	NA
B73_Cluster_0879	Zm00001d028554,Zm00001d028555,Zm00001d028556,Zm00001d028557,Zm00001d028561	B73	Maize1	Private	PH207_Cluster_0037	4.0793511208,1.60037209336,1.60037209336,0.283447675839
B73_Cluster_0880	Zm00001d028630,Zm00001d028639	B73	Maize1	Shared	PH207_Cluster_0040	11.7388
B73_Cluster_0881	Zm00001d028679,Zm00001d028680	B73	Maize1	Shared	PH207_Cluster_0041	6.52531
B73_Cluster_0882	Zm00001d028731,Zm00001d028732	B73	Maize1	Private	NA	11.7596
B73_Cluster_0883	Zm00001d028740,Zm00001d028741	B73	Nonsyntenic	NA	NA	NA
B73_Cluster_0884	Zm00001d028767,Zm00001d028768	B73	Maize1	Private	NA	11.6932
B73_Cluster_0885	Zm00001d028814,Zm00001d028815,Zm00001d028816	B73	Maize1	Shared	PH207_Cluster_0044	7.03086037332,11.7295172968
B73_Cluster_0886	Zm00001d028821,Zm00001d028822,Zm00001d028823	B73	Maize1	Private	NA	11.7305926333,11.7305926333
B73_Cluster_0887	Zm00001d028842,Zm00001d028845,Zm00001d028849,Zm00001d028850,Zm00001d028854	B73	Maize1	Private	NA	11.7175187594,1.1436113353,1.1436113353,11.7175187594
B73_Cluster_0888	Zm00001d028887,Zm00001d028888	B73	Maize1	Shared	PH207_Cluster_0046	2.12559
B73_Cluster_0889	Zm00001d028987,Zm00001d028988	B73	Maize1	Private	NA	11.746
B73_Cluster_0890	Zm00001d028995,Zm00001d028999	B73	Maize1	Private	NA	0.0253985
B73_Cluster_0891	Zm00001d029084,Zm00001d029088	B73	Maize1	Private	NA	11.8185
B73_Cluster_0892	Zm00001d029085,Zm00001d029089	B73	Maize1	Private	NA	9.34724
B73_Cluster_0893	Zm00001d029086,Zm00001d029090	B73	Maize1	Shared	PH207_Cluster_0050	0.682216
B73_Cluster_0894	Zm00001d029099,Zm00001d029101	B73	Maize1	Private	NA	11.7837
B73_Cluster_0895	Zm00001d029108,Zm00001d029111,Zm00001d029115,Zm00001d029117	B73	Maize1	Shared	PH207_Cluster_0052	0.0938981351129,11.7721492163,0.0647354310431
B73_Cluster_0896	Zm00001d029109,Zm00001d029112	B73	Nonsyntenic	NA	NA	NA
B73_Cluster_0897	Zm00001d029146,Zm00001d029157,Zm00001d029159	B73	Nonsyntenic	Private	NA	0.00023679205859,0.00226465193652
B73_Cluster_0898	Zm00001d029154,Zm00001d029164	B73	Maize1	Private	NA	0.308032
B73_Cluster_0899	Zm00001d029183,Zm00001d029184	B73	Nonsyntenic	Private	NA	11.732
B73_Cluster_0900	Zm00001d029209,Zm00001d029211	B73	Maize1	Shared	PH207_Cluster_0056	11.7158
B73_Cluster_0901	Zm00001d029241,Zm00001d029243	B73	Maize1	Private	NA	5.66116
B73_Cluster_0902	Zm00001d029246,Zm00001d029247	B73	Maize1	Private	NA	11.7363
B73_Cluster_0903	Zm00001d029274,Zm00001d029279,Zm00001d029280	B73	Nonsyntenic	Shared	PH207_Cluster_0058	11.7183019228,11.7183019228
B73_Cluster_0904	Zm00001d029288,Zm00001d029289,Zm00001d029290	B73	Maize1	Shared	PH207_Cluster_0059	5.95290079059,5.34729394601
B73_Cluster_0905	Zm00001d029314,Zm00001d029318,Zm00001d029319,Zm00001d029320,Zm00001d029321	B73	Maize1	Shared	PH207_Cluster_0062	5.93846879283,11.7080483924,11.7080483924,6.14890205207
B73_Cluster_0906	Zm00001d029353,Zm00001d029356,Zm00001d029359	B73	Maize1	Shared	PH207_Cluster_0063	7.83036864639,7.83036864639
B73_Cluster_0907	Zm00001d029372,Zm00001d029373	B73	Maize1	Private	NA	11.7304
B73_Cluster_0908	Zm00001d029376,Zm00001d029377	B73	Maize1	Shared	PH207_Cluster_0064	11.7528
B73_Cluster_0909	Zm00001d029387,Zm00001d029388,Zm00001d029389	B73	Maize1	Shared	PH207_Cluster_0065	9.4031323253,10.8157016077
B73_Cluster_0910	Zm00001d029457,Zm00001d029459	B73	Maize1	Shared	PH207_Cluster_0067	4.48101
B73_Cluster_0911	Zm00001d029476,Zm00001d029478	B73	Maize1	Private	PH207_Cluster_0068	11.7098
B73_Cluster_0912	Zm00001d029519,Zm00001d029520,Zm00001d029526	B73	Maize1	Shared	PH207_Cluster_0069	0.847552112303,2.31014118334
B73_Cluster_0913	Zm00001d029580,Zm00001d029581,Zm00001d029582	B73	Maize1	Shared	PH207_Cluster_0071	2.96868145532,2.49840237796
B73_Cluster_0914	Zm00001d029584,Zm00001d029586,Zm00001d029587,Zm00001d029589	B73	Maize1	Shared	PH207_Cluster_0072	11.723967861,2.69843911813,0.527230691287
B73_Cluster_0915	Zm00001d029601,Zm00001d029602	B73	Maize1	Private	NA	3.87466
B73_Cluster_0916	Zm00001d029628,Zm00001d029630,Zm00001d029631	B73	Maize1	Shared	PH207_Cluster_0073	11.722715899,11.722715899
B73_Cluster_0917	Zm00001d029667,Zm00001d029668	B73	Maize1	Private	NA	0.00570199
B73_Cluster_0918	Zm00001d029696,Zm00001d029699,Zm00001d029700,Zm00001d029701,Zm00001d029702,Zm00001d029703,Zm00001d029704,Zm00001d029706,Zm00001d029707,Zm00001d029708	B73	Nonsyntenic	Shared	PH207_Cluster_0076	0.0026672421908,0.00880247024642,0.00880247024642,0.00137858194156,0.00224589087593,0.0026672421908,0.00387713701446,11.9044121132,11.9044121132
B73_Cluster_0919	Zm00001d029773,Zm00001d029775	B73	Maize1	Private	NA	11.8023
B73_Cluster_0920	Zm00001d029783,Zm00001d029784	B73	Maize1	Private	NA	11.7654
B73_Cluster_0921	Zm00001d029792,Zm00001d029798,Zm00001d029800	B73	Maize1	Shared	PH207_Cluster_0077	8.77940136548,1.84234660802
B73_Cluster_0922	Zm00001d029793,Zm00001d029799,Zm00001d029801	B73	Maize1	Shared	PH207_Cluster_0078	11.7211350222,9.28535214051
B73_Cluster_0923	Zm00001d029858,Zm00001d029859	B73	Maize1	Shared	PH207_Cluster_0080	11.7278
B73_Cluster_0924	Zm00001d029899,Zm00001d029903,Zm00001d029906,Zm00001d029907,Zm00001d029913	B73	Nonsyntenic	Shared	PH207_Cluster_0081	10.9240006511,10.9240006511,11.7287136741,11.7287136741
B73_Cluster_0925	Zm00001d029901,Zm00001d029902	B73	Nonsyntenic	NA	NA	NA
B73_Cluster_0926	Zm00001d029922,Zm00001d029924	B73	Maize1	Shared	PH207_Cluster_0082	1.45908
B73_Cluster_0927	Zm00001d029932,Zm00001d029933	B73	Maize1	Shared	PH207_Cluster_0083	11.7216
B73_Cluster_0928	Zm00001d029969,Zm00001d029970	B73	Maize1	Private	NA	11.8016
B73_Cluster_0929	Zm00001d030079,Zm00001d030080	B73	Maize1	Private	NA	4.20143
B73_Cluster_0930	Zm00001d030094,Zm00001d030095	B73	Maize1	Shared	PH207_Cluster_0087	3.48424
B73_Cluster_0931	Zm00001d030127,Zm00001d030130	B73	Maize1	Shared	PH207_Cluster_0088	11.722
B73_Cluster_0932	Zm00001d030158,Zm00001d030159	B73	Maize1	Shared	PH207_Cluster_0089	11.7374
B73_Cluster_0933	Zm00001d030177,Zm00001d030180	B73	Maize1	Private	NA	11.808
B73_Cluster_0934	Zm00001d030207,Zm00001d030208	B73	Maize1	Shared	PH207_Cluster_0091	9.58191
B73_Cluster_0935	Zm00001d030212,Zm00001d030213,Zm00001d030218	B73	Nonsyntenic	Private	PH207_Cluster_0092	11.9002043125,1.06064400739
B73_Cluster_0936	Zm00001d030233,Zm00001d030234,Zm00001d030235	B73	Maize1	Shared	PH207_Cluster_0094	11.7248044844,11.7248044844
B73_Cluster_0937	Zm00001d030248,Zm00001d030253	B73	Maize1	Shared	PH207_Cluster_0095	11.723
B73_Cluster_0938	Zm00001d030261,Zm00001d030262	B73	Nonsyntenic	NA	NA	NA
B73_Cluster_0939	Zm00001d030270,Zm00001d030282,Zm00001d030285	B73	Maize1	Shared	PH207_Cluster_0097	11.7392550098,11.7392550098
B73_Cluster_0940	Zm00001d030274,Zm00001d030275,Zm00001d030276,Zm00001d030277	B73	Nonsyntenic	NA	NA	NA
B73_Cluster_0941	Zm00001d030303,Zm00001d030304	B73	Maize1	Shared	PH207_Cluster_0099	0.989223
B73_Cluster_0942	Zm00001d030314,Zm00001d030316	B73	Maize1	Shared	PH207_Cluster_0100	2.42315
B73_Cluster_0943	Zm00001d030345,Zm00001d030346	B73	Maize1	Shared	PH207_Cluster_0102	4.07389
B73_Cluster_0944	Zm00001d030347,Zm00001d030348	B73	Maize1	Shared	PH207_Cluster_0103	11.7318
B73_Cluster_0945	Zm00001d030453,Zm00001d030459	B73	Nonsyntenic	Private	NA	11.7625
B73_Cluster_0946	Zm00001d030484,Zm00001d030487	B73	Nonsyntenic	NA	NA	NA
B73_Cluster_0947	Zm00001d030540,Zm00001d030542	B73	Maize1	Private	NA	6.01269
B73_Cluster_0948	Zm00001d030679,Zm00001d030680	B73	Nonsyntenic	NA	NA	NA
B73_Cluster_0949	Zm00001d030707,Zm00001d030720	B73	Maize1	Shared	PH207_Cluster_0110	11.7273
B73_Cluster_0950	Zm00001d030801,Zm00001d030803	B73	Nonsyntenic	Private	NA	11.7304
B73_Cluster_0951	Zm00001d030813,Zm00001d030819	B73	Nonsyntenic	Private	PH207_Cluster_0113	11.722
B73_Cluster_0952	Zm00001d030814,Zm00001d030818,Zm00001d030824	B73	Nonsyntenic	Shared	PH207_Cluster_0113	11.9128798537,0.00280546102517
B73_Cluster_0953	Zm00001d030845,Zm00001d030851,Zm00001d030856	B73	Nonsyntenic	Private	PH207_Cluster_0114	0.00131226436641,0.000482781828263
B73_Cluster_0954	Zm00001d030907,Zm00001d030908	B73	Maize1	Private	NA	11.7331
B73_Cluster_0955	Zm00001d030918,Zm00001d030919	B73	Nonsyntenic	NA	NA	NA
B73_Cluster_0956	Zm00001d030920,Zm00001d030934	B73	Maize1	Shared	PH207_Cluster_0117	11.7425
B73_Cluster_0957	Zm00001d030921,Zm00001d030923,Zm00001d030924,Zm00001d030926,Zm00001d030927	B73	Nonsyntenic	Private	NA	1.77873406599,1.77873406599,1.77873406599,11.733197524
B73_Cluster_0958	Zm00001d030932,Zm00001d030933	B73	Nonsyntenic	Private	NA	11.7915
B73_Cluster_0959	Zm00001d030947,Zm00001d030950	B73	Maize1	Private	NA	3.21849
B73_Cluster_0960	Zm00001d030971,Zm00001d030972	B73	Maize1	Private	NA	11.7412
B73_Cluster_0961	Zm00001d031030,Zm00001d031031	B73	Nonsyntenic	NA	NA	NA
B73_Cluster_0962	Zm00001d031077,Zm00001d031078	B73	Maize1	Private	NA	0.459667
B73_Cluster_0963	Zm00001d031122,Zm00001d031123	B73	Nonsyntenic	NA	NA	NA
B73_Cluster_0964	Zm00001d031152,Zm00001d031155,Zm00001d031157,Zm00001d031158	B73	Maize1	Shared	PH207_Cluster_0118	8.61438612418,0.976872108852,6.48503371078
B73_Cluster_0965	Zm00001d031196,Zm00001d031197	B73	Maize1	Shared	PH207_Cluster_0119	11.7304
B73_Cluster_0966	Zm00001d031203,Zm00001d031204	B73	Maize1	Shared	PH207_Cluster_0120	11.7428
B73_Cluster_0967	Zm00001d031221,Zm00001d031222	B73	Maize1	Shared	PH207_Cluster_0121	11.7277
B73_Cluster_0968	Zm00001d031236,Zm00001d031239,Zm00001d031241	B73	Nonsyntenic	Private	NA	11.7362664805,11.7362664805
B73_Cluster_0969	Zm00001d031280,Zm00001d031281	B73	Maize1	Private	NA	2.24553
B73_Cluster_0970	Zm00001d031283,Zm00001d031286	B73	Maize1	Private	NA	11.8136
B73_Cluster_0971	Zm00001d031300,Zm00001d031303	B73	Maize1	Shared	PH207_Cluster_0124	0.224124
B73_Cluster_0972	Zm00001d031305,Zm00001d031306	B73	Nonsyntenic	NA	NA	NA
B73_Cluster_0973	Zm00001d031345,Zm00001d031346	B73	Nonsyntenic	Shared	PH207_Cluster_0126	0.00147192
B73_Cluster_0974	Zm00001d031349,Zm00001d031364,Zm00001d031379,Zm00001d031403	B73	Nonsyntenic	Private	PH207_Cluster_0127	0.003637154482,0.000237332219747,4.48564262347e-05
B73_Cluster_0975	Zm00001d031351,Zm00001d031366,Zm00001d031372,Zm00001d031381,Zm00001d031384,Zm00001d031395,Zm00001d031407	B73	Maize1	Private	NA	6.95212040779,8.18889291305,10.2008477082,11.7404818886,11.7404818886,10.2008477082
B73_Cluster_0976	Zm00001d031359,Zm00001d031377,Zm00001d031398	B73	Nonsyntenic	Shared	PH207_Cluster_0129	6.14386111352,5.33147165685
B73_Cluster_0977	Zm00001d031362,Zm00001d031363	B73	Nonsyntenic	NA	NA	NA
B73_Cluster_0978	Zm00001d031367,Zm00001d031375,Zm00001d031380,Zm00001d031396,Zm00001d031404,Zm00001d031409,Zm00001d031410	B73	Maize1	Shared	PH207_Cluster_0128	7.78860248543,11.716357321,9.8493601209,11.716357321,8.83866307184,0.40486670827
B73_Cluster_0979	Zm00001d031498,Zm00001d031499,Zm00001d031500,Zm00001d031501	B73	Maize1	Shared	PH207_Cluster_0132	11.7112375796,0.915507475047,0.518514991641
B73_Cluster_0980	Zm00001d031519,Zm00001d031520	B73	Maize1	Private	NA	2.76811
B73_Cluster_0981	Zm00001d031549,Zm00001d031550	B73	Maize1	Shared	PH207_Cluster_0134	8.02279
B73_Cluster_0982	Zm00001d031555,Zm00001d031556	B73	Maize1	Private	NA	11.7137
B73_Cluster_0983	Zm00001d031638,Zm00001d031639	B73	Maize1	Shared	PH207_Cluster_0137	3.45376
B73_Cluster_0984	Zm00001d031669,Zm00001d031672	B73	Maize1	Private	NA	2.22587
B73_Cluster_0985	Zm00001d031670,Zm00001d031671	B73	Maize1	Private	NA	11.7479
B73_Cluster_0986	Zm00001d031771,Zm00001d031772	B73	Nonsyntenic	Private	NA	8.02047
B73_Cluster_0987	Zm00001d031778,Zm00001d031779	B73	Maize1	Private	NA	11.7353
B73_Cluster_0988	Zm00001d031801,Zm00001d031804,Zm00001d031805	B73	Maize1	Shared	PH207_Cluster_0138	11.7224652781,8.73278712717
B73_Cluster_0989	Zm00001d031811,Zm00001d031813,Zm00001d031814,Zm00001d031815	B73	Maize1	Shared	PH207_Cluster_0139	3.86683622136,11.7489821869,11.7489821869
B73_Cluster_0990	Zm00001d031904,Zm00001d031906,Zm00001d031907	B73	Maize1	Shared	PH207_Cluster_0140	11.7321172064,10.0505026606
B73_Cluster_0991	Zm00001d031945,Zm00001d031951,Zm00001d031953	B73	Maize1	Private	NA	11.7306364944,6.48703521615
B73_Cluster_0992	Zm00001d031946,Zm00001d031949,Zm00001d031954	B73	Maize1	Shared	PH207_Cluster_0141	11.727127117,10.259077116
B73_Cluster_0993	Zm00001d031956,Zm00001d031957	B73	Maize1	Private	NA	11.7295
B73_Cluster_0994	Zm00001d031986,Zm00001d031988	B73	Maize1	Shared	PH207_Cluster_0143	11.7281
B73_Cluster_0995	Zm00001d032000,Zm00001d032003,Zm00001d032004	B73	Maize1	Private	NA	6.0690718209,11.7291718783
B73_Cluster_0996	Zm00001d032012,Zm00001d032013	B73	Maize1	Private	NA	0.761672
B73_Cluster_0997	Zm00001d032024,Zm00001d032032	B73	Maize1	Shared	PH207_Cluster_0144	6.33629
B73_Cluster_0998	Zm00001d032035,Zm00001d032042	B73	Maize1	Private	NA	0.446616
B73_Cluster_0999	Zm00001d032047,Zm00001d032048	B73	Maize1	Shared	PH207_Cluster_0145	7.77373
B73_Cluster_1000	Zm00001d032053,Zm00001d032054	B73	Maize1	Private	NA	11.7999
B73_Cluster_1001	Zm00001d032087,Zm00001d032088,Zm00001d032091,Zm00001d032094	B73	Maize1	Shared	PH207_Cluster_0147	11.7257171843,11.7257171843,6.87190762594
B73_Cluster_1002	Zm00001d032178,Zm00001d032179	B73	Maize1	Shared	PH207_Cluster_0148	0.0287599
B73_Cluster_1003	Zm00001d032234,Zm00001d032235,Zm00001d032237	B73	Maize1	Private	NA	11.7421618246,11.7421618246
B73_Cluster_1004	Zm00001d032239,Zm00001d032240	B73	Maize1	Private	NA	7.01892
B73_Cluster_1005	Zm00001d032285,Zm00001d032287	B73	Maize1	Shared	PH207_Cluster_0149	11.7287
B73_Cluster_1006	Zm00001d032391,Zm00001d032392,Zm00001d032394	B73	Nonsyntenic	NA	NA	NA
B73_Cluster_1007	Zm00001d032405,Zm00001d032406	B73	Maize1	Shared	PH207_Cluster_0150	11.7306
B73_Cluster_1008	Zm00001d032422,Zm00001d032423	B73	Maize1	Private	NA	11.78
B73_Cluster_1009	Zm00001d032447,Zm00001d032448	B73	Maize1	Private	NA	11.8732
B73_Cluster_1010	Zm00001d032458,Zm00001d032459	B73	Nonsyntenic	NA	NA	NA
B73_Cluster_1011	Zm00001d032491,Zm00001d032492	B73	Maize1	Shared	PH207_Cluster_0152	11.7659
B73_Cluster_1012	Zm00001d032535,Zm00001d032536	B73	Maize1	Private	NA	9.06943
B73_Cluster_1013	Zm00001d032548,Zm00001d032556	B73	Maize1	Shared	PH207_Cluster_0156	1.26015
B73_Cluster_1014	Zm00001d032550,Zm00001d032557	B73	Maize1	Shared	PH207_Cluster_0157	0.0474725
B73_Cluster_1015	Zm00001d032605,Zm00001d032608	B73	Maize1	Shared	PH207_Cluster_0158	11.715
B73_Cluster_1016	Zm00001d032624,Zm00001d032626,Zm00001d032628,Zm00001d032629,Zm00001d032630,Zm00001d032631	B73	Maize1	Shared	PH207_Cluster_0159	4.45194074398,3.1080919958,1.21389424973,1.2900870088,0.200662008577
B73_Cluster_1017	Zm00001d032691,Zm00001d032692	B73	Maize1	Shared	PH207_Cluster_0160	11.7289
B73_Cluster_1018	Zm00001d032719,Zm00001d032721	B73	Maize1	Shared	PH207_Cluster_0161	11.7371
B73_Cluster_1019	Zm00001d032740,Zm00001d032744	B73	Maize1	Shared	PH207_Cluster_0162	2.06879
B73_Cluster_1020	Zm00001d032750,Zm00001d032753	B73	Maize1	Shared	PH207_Cluster_0164	11.7258
B73_Cluster_1021	Zm00001d032791,Zm00001d032794,Zm00001d032795,Zm00001d032797	B73	Maize1	Shared	PH207_Cluster_0165	11.7041170012,11.7041170012,9.94642481936
B73_Cluster_1022	Zm00001d032822,Zm00001d032823	B73	Maize1	Private	NA	11.8122
B73_Cluster_1023	Zm00001d032830,Zm00001d032831	B73	Maize1	Private	NA	0.0330682
B73_Cluster_1024	Zm00001d032836,Zm00001d032837	B73	Maize1	Shared	PH207_Cluster_0166	0.00653112
B73_Cluster_1025	Zm00001d032843,Zm00001d032847	B73	Maize1	Private	NA	0.515736
B73_Cluster_1026	Zm00001d032868,Zm00001d032869,Zm00001d032870	B73	Maize1	Shared	PH207_Cluster_0167	3.01141961592,11.720953578
B73_Cluster_1027	Zm00001d032876,Zm00001d032881,Zm00001d032882,Zm00001d032883,Zm00001d032884,Zm00001d032885,Zm00001d032886	B73	Maize1	Shared	PH207_Cluster_0168	11.7179457975,11.7179457975,5.65832030268,5.65832030268,0.501649805479,3.92624150171
B73_Cluster_1028	Zm00001d032927,Zm00001d032929	B73	Maize1	Private	NA	11.8124
B73_Cluster_1029	Zm00001d032942,Zm00001d032943	B73	Maize1	Private	NA	11.8278
B73_Cluster_1030	Zm00001d032946,Zm00001d032947	B73	Maize1	Private	NA	0.0360266
B73_Cluster_1031	Zm00001d032985,Zm00001d032987	B73	Nonsyntenic	Shared	PH207_Cluster_0170	11.7455
B73_Cluster_1032	Zm00001d033013,Zm00001d033015	B73	Nonsyntenic	NA	NA	NA
B73_Cluster_1033	Zm00001d033029,Zm00001d033030	B73	Maize1	Shared	PH207_Cluster_0172	11.72
B73_Cluster_1034	Zm00001d033049,Zm00001d033050	B73	Maize1	Private	NA	0.852608
B73_Cluster_1035	Zm00001d033061,Zm00001d033062,Zm00001d033063	B73	Maize1	Shared	PH207_Cluster_0173	0.827878238242,3.23991469656
B73_Cluster_1036	Zm00001d033066,Zm00001d033067,Zm00001d033068,Zm00001d033071	B73	Nonsyntenic	Private	PH207_Cluster_0174	0.00295641894248,0.00295641894248,0.00295641894248
B73_Cluster_1037	Zm00001d033129,Zm00001d033130	B73	Maize1	Shared	PH207_Cluster_0176	7.64311
B73_Cluster_1038	Zm00001d033132,Zm00001d033136	B73	Maize1	Private	NA	4.19804
B73_Cluster_1039	Zm00001d033154,Zm00001d033156	B73	Nonsyntenic	Private	NA	11.7269
B73_Cluster_1040	Zm00001d033189,Zm00001d033190	B73	Maize1	Shared	PH207_Cluster_0178	11.7584
B73_Cluster_1041	Zm00001d033195,Zm00001d033196,Zm00001d033200,Zm00001d033201	B73	Maize1	Private	NA	0.863519838671,11.7376968833,0.818610153046
B73_Cluster_1042	Zm00001d033207,Zm00001d033208	B73	Maize1	Shared	PH207_Cluster_0180	11.7292
B73_Cluster_1043	Zm00001d033247,Zm00001d033248	B73	Maize1	Shared	PH207_Cluster_0182	6.15103
B73_Cluster_1044	Zm00001d033250,Zm00001d033252	B73	Nonsyntenic	NA	NA	NA
B73_Cluster_1045	Zm00001d033254,Zm00001d033256	B73	Maize1	Shared	PH207_Cluster_0183	11.731
B73_Cluster_1046	Zm00001d033272,Zm00001d033273	B73	Maize1	Private	NA	11.7991
B73_Cluster_1047	Zm00001d033313,Zm00001d033314	B73	Nonsyntenic	Shared	PH207_Cluster_0184	11.8421
B73_Cluster_1048	Zm00001d033348,Zm00001d033351	B73	Nonsyntenic	NA	NA	NA
B73_Cluster_1049	Zm00001d033360,Zm00001d033362	B73	Maize1	Shared	PH207_Cluster_0186	11.7125
B73_Cluster_1050	Zm00001d033407,Zm00001d033412,Zm00001d033413	B73	Maize1	Shared	PH207_Cluster_0188	6.17243859737,11.737551688
B73_Cluster_1051	Zm00001d033408,Zm00001d033409	B73	Nonsyntenic	NA	NA	NA
B73_Cluster_1052	Zm00001d033415,Zm00001d033416	B73	Maize1	Private	NA	11.7144
B73_Cluster_1053	Zm00001d033429,Zm00001d033430,Zm00001d033433,Zm00001d033434,Zm00001d033436,Zm00001d033438,Zm00001d033440,Zm00001d033442	B73	Maize1	Shared	PH207_Cluster_0189	1.94522974149,1.8433273655,0.544379222982,1.94522974149,1.94522974149,0.05076036664,1.18778381237
B73_Cluster_1054	Zm00001d033460,Zm00001d033462,Zm00001d033463,Zm00001d033464	B73	Maize1	Shared	PH207_Cluster_0192	1.72898274117,3.43917777746,4.98519692513
B73_Cluster_1055	Zm00001d033489,Zm00001d033490	B73	Maize1	Shared	PH207_Cluster_0193	3.18915
B73_Cluster_1056	Zm00001d033514,Zm00001d033516	B73	Maize1	Shared	PH207_Cluster_0194	6.41186
B73_Cluster_1057	Zm00001d033530,Zm00001d033531	B73	Maize1	Shared	PH207_Cluster_0195	11.7559
B73_Cluster_1058	Zm00001d033535,Zm00001d033537	B73	Maize1	Private	NA	0.121029
B73_Cluster_1059	Zm00001d033564,Zm00001d033571	B73	Maize1	Shared	PH207_Cluster_0197	11.7207
B73_Cluster_1060	Zm00001d033606,Zm00001d033607	B73	Maize1	Shared	PH207_Cluster_0198	1.12727
B73_Cluster_1061	Zm00001d033623,Zm00001d033624	B73	Maize1	Private	NA	11.7527
B73_Cluster_1062	Zm00001d033649,Zm00001d033650,Zm00001d033651	B73	Maize1	Shared	PH207_Cluster_0200	6.03423195219,6.03423195219
B73_Cluster_1063	Zm00001d033686,Zm00001d033689,Zm00001d033694	B73	Nonsyntenic	Private	NA	9.74114914562,9.74114914562
B73_Cluster_1064	Zm00001d033699,Zm00001d033700	B73	Nonsyntenic	NA	NA	NA
B73_Cluster_1065	Zm00001d033709,Zm00001d033710,Zm00001d033711	B73	Maize1	Shared	PH207_Cluster_0201	11.7261503529,11.7261503529
B73_Cluster_1066	Zm00001d033754,Zm00001d033765	B73	Maize1	Shared	PH207_Cluster_0202	11.715
B73_Cluster_1067	Zm00001d033836,Zm00001d033837	B73	Maize1	Shared	PH207_Cluster_0203	11.7319
B73_Cluster_1068	Zm00001d033859,Zm00001d033861	B73	Maize1	Private	NA	11.804
B73_Cluster_1069	Zm00001d033890,Zm00001d033891,Zm00001d033892	B73	Maize1	Shared	PH207_Cluster_0206	4.64249499328,2.28303783481
B73_Cluster_1070	Zm00001d033897,Zm00001d033899	B73	Maize1	Private	NA	11.7909
B73_Cluster_1071	Zm00001d033942,Zm00001d033943	B73	Maize1	Private	NA	11.7267
B73_Cluster_1072	Zm00001d034002,Zm00001d034003	B73	Maize1	Shared	PH207_Cluster_0207	11.7134
B73_Cluster_1073	Zm00001d034015,Zm00001d034017	B73	Maize1	Shared	PH207_Cluster_0208	11.7193
B73_Cluster_1074	Zm00001d034040,Zm00001d034043	B73	Nonsyntenic	Shared	PH207_Cluster_0211	11.7194
B73_Cluster_1075	Zm00001d034045,Zm00001d034047	B73	Maize1	Private	NA	4.53202
B73_Cluster_1076	Zm00001d034057,Zm00001d034058	B73	Maize1	Shared	PH207_Cluster_0212	11.732
B73_Cluster_1077	Zm00001d034066,Zm00001d034067,Zm00001d034068,Zm00001d034069	B73	Maize1	Shared	PH207_Cluster_0213	11.7199214067,11.7199214067,3.82591991706
B73_Cluster_1078	Zm00001d034095,Zm00001d034096,Zm00001d034097,Zm00001d034104,Zm00001d034107	B73	Maize1	Shared	PH207_Cluster_0214	0.192092071226,2.16683429222,11.7146559023,11.7146559023
B73_Cluster_1079	Zm00001d034125,Zm00001d034137	B73	Maize1	Shared	PH207_Cluster_0215	5.87453
B73_Cluster_1080	Zm00001d034128,Zm00001d034129	B73	Maize1	Private	PH207_Cluster_0216	11.7696
B73_Cluster_1081	Zm00001d034164,Zm00001d034166	B73	Maize1	Shared	PH207_Cluster_0217	11.7431
B73_Cluster_1082	Zm00001d034184,Zm00001d034186	B73	Maize1	Private	NA	0.319072
B73_Cluster_1083	Zm00001d034200,Zm00001d034201	B73	Maize1	Private	NA	11.7305
B73_Cluster_1084	Zm00001d034246,Zm00001d034247	B73	Nonsyntenic	NA	NA	NA
B73_Cluster_1085	Zm00001d034265,Zm00001d034266	B73	Maize1	Private	NA	11.8083
B73_Cluster_1086	Zm00001d034305,Zm00001d034307	B73	Maize1	Private	NA	11.8208
B73_Cluster_1087	Zm00001d034322,Zm00001d034324	B73	Nonsyntenic	NA	NA	NA
B73_Cluster_1088	Zm00001d034327,Zm00001d034331	B73	Nonsyntenic	NA	NA	NA
B73_Cluster_1089	Zm00001d034330,Zm00001d034333	B73	Nonsyntenic	NA	NA	NA
B73_Cluster_1090	Zm00001d034372,Zm00001d034376	B73	Maize1	Shared	PH207_Cluster_0219	10.2412
B73_Cluster_1091	Zm00001d034385,Zm00001d034387,Zm00001d034388	B73	Maize1	Shared	PH207_Cluster_0220	7.13553181151,7.13553181151
B73_Cluster_1092	Zm00001d034415,Zm00001d034416	B73	Maize1	Shared	PH207_Cluster_0221	11.7335
B73_Cluster_1093	Zm00001d034417,Zm00001d034418,Zm00001d034419	B73	Maize1	Shared	PH207_Cluster_0222	2.68796260741,11.7342630157
B73_Cluster_1094	Zm00001d034431,Zm00001d034432	B73	Maize1	Shared	PH207_Cluster_0223	10.571
B73_Cluster_1095	Zm00001d034446,Zm00001d034454,Zm00001d034456	B73	Maize1	Private	NA	9.56088335083,0.306638531578
B73_Cluster_1096	Zm00001d034447,Zm00001d034448,Zm00001d034455,Zm00001d034457	B73	Maize1	Shared	PH207_Cluster_0224	11.73402202,0.867112674506,0.731487519597
B73_Cluster_1097	Zm00001d034452,Zm00001d034453	B73	Nonsyntenic	NA	NA	NA
B73_Cluster_1098	Zm00001d034460,Zm00001d034461	B73	Maize1	Shared	PH207_Cluster_0225	11.7285
B73_Cluster_1099	Zm00001d034482,Zm00001d034483	B73	Maize1	Private	NA	11.7202
B73_Cluster_1100	Zm00001d034488,Zm00001d034489	B73	Maize1	Private	NA	1.19119
B73_Cluster_1101	Zm00001d034520,Zm00001d034521	B73	Maize1	Shared	PH207_Cluster_0226	3.19655
B73_Cluster_1102	Zm00001d034538,Zm00001d034540,Zm00001d034541,Zm00001d034542	B73	Nonsyntenic	Private	PH207_Cluster_0227	11.7100937754,6.7840782831,7.15119035804
B73_Cluster_1103	Zm00001d034551,Zm00001d034552	B73	Nonsyntenic	Private	NA	11.7541
B73_Cluster_1104	Zm00001d034620,Zm00001d034621	B73	Maize1	Private	NA	11.7356
B73_Cluster_1105	Zm00001d034639,Zm00001d034641,Zm00001d034642	B73	Maize1	Private	NA	11.7375378951,1.97175462232
B73_Cluster_1106	Zm00001d034643,Zm00001d034644	B73	Maize1	Shared	PH207_Cluster_0229	10.3693
B73_Cluster_1107	Zm00001d034651,Zm00001d034653	B73	Maize1	Private	NA	7.04952
B73_Cluster_1108	Zm00001d034671,Zm00001d034672	B73	Maize1	Private	NA	11.7378
B73_Cluster_1109	Zm00001d034675,Zm00001d034676	B73	Maize1	Private	NA	3.12159
B73_Cluster_1110	Zm00001d034686,Zm00001d034687	B73	Maize1	Private	NA	11.828
B73_Cluster_1111	Zm00001d034715,Zm00001d034716	B73	Maize1	Private	NA	11.8134
B73_Cluster_1112	Zm00001d034741,Zm00001d034742	B73	Maize1	Private	NA	0.00184539
B73_Cluster_1113	Zm00001d034746,Zm00001d034747	B73	Maize1	Shared	PH207_Cluster_0233	11.7191
B73_Cluster_1114	Zm00001d034771,Zm00001d034773,Zm00001d034776	B73	Maize1	Shared	PH207_Cluster_0234	11.7298159538,4.53313106923
B73_Cluster_1115	Zm00001d034802,Zm00001d034803	B73	Maize1	Private	NA	0.00676831
B73_Cluster_1116	Zm00001d034900,Zm00001d034904	B73	Maize1	Shared	PH207_Cluster_0236	11.7302
B73_Cluster_1117	Zm00001d034945,Zm00001d034946,Zm00001d034947	B73	Maize1	Shared	PH207_Cluster_0237	11.7279792227,11.7279792227
B73_Cluster_1118	Zm00001d034976,Zm00001d034977	B73	Maize1	Shared	PH207_Cluster_0851	11.7896
B73_Cluster_1119	Zm00001d035001,Zm00001d035002,Zm00001d035003	B73	Maize1	Shared	PH207_Cluster_0854	6.09422446488,11.7361949604
B73_Cluster_1120	Zm00001d035020,Zm00001d035021	B73	Maize1	Private	NA	11.7265
B73_Cluster_1121	Zm00001d035037,Zm00001d035038	B73	Nonsyntenic	NA	NA	NA
B73_Cluster_1122	Zm00001d035056,Zm00001d035063	B73	Maize1	Private	NA	11.7237
B73_Cluster_1123	Zm00001d035057,Zm00001d035064	B73	Maize1	Private	NA	11.7109
B73_Cluster_1124	Zm00001d035076,Zm00001d035084	B73	Maize1	Private	NA	11.7537
B73_Cluster_1125	Zm00001d035079,Zm00001d035080	B73	Maize1	Private	NA	11.7108
B73_Cluster_1126	Zm00001d035100,Zm00001d035101,Zm00001d035102,Zm00001d035104,Zm00001d035108,Zm00001d035109,Zm00001d035111,Zm00001d035112	B73	Maize1	Shared	PH207_Cluster_0858	10.8905977031,0.235775065065,3.84365329036,5.524273596,1.69458543481,11.7392567128,9.34907609476
B73_Cluster_1127	Zm00001d035143,Zm00001d035145	B73	Nonsyntenic	Private	NA	0.0988685
B73_Cluster_1128	Zm00001d035154,Zm00001d035155	B73	Maize1	Private	NA	11.7266
B73_Cluster_1129	Zm00001d035157,Zm00001d035161,Zm00001d035162,Zm00001d035163,Zm00001d035166	B73	Maize1	Shared	PH207_Cluster_0859	6.89658107641,9.91875903247,7.15483935985,9.91875903247
B73_Cluster_1130	Zm00001d035172,Zm00001d035174,Zm00001d035183	B73	Maize1	Private	NA	0.0347758114666,3.71137878902
B73_Cluster_1131	Zm00001d035224,Zm00001d035230,Zm00001d035234	B73	Nonsyntenic	Shared	PH207_Cluster_0866	3.4430295294,11.7329182384
B73_Cluster_1132	Zm00001d035228,Zm00001d035229	B73	Nonsyntenic	Private	NA	0.0458817
B73_Cluster_1133	Zm00001d035232,Zm00001d035233	B73	Nonsyntenic	NA	NA	NA
B73_Cluster_1134	Zm00001d035246,Zm00001d035249	B73	Nonsyntenic	Shared	PH207_Cluster_0865	11.7357
B73_Cluster_1135	Zm00001d035257,Zm00001d035262	B73	Nonsyntenic	NA	NA	NA
B73_Cluster_1136	Zm00001d035258,Zm00001d035261	B73	Nonsyntenic	NA	NA	NA
B73_Cluster_1137	Zm00001d035309,Zm00001d035310	B73	Nonsyntenic	Private	NA	11.5991
B73_Cluster_1138	Zm00001d035316,Zm00001d035317	B73	Nonsyntenic	NA	NA	NA
B73_Cluster_1139	Zm00001d035361,Zm00001d035362	B73	Nonsyntenic	NA	NA	NA
B73_Cluster_1140	Zm00001d035389,Zm00001d035392	B73	Nonsyntenic	Private	NA	11.7093
B73_Cluster_1141	Zm00001d035400,Zm00001d035401	B73	Nonsyntenic	Shared	PH207_Cluster_0862	7.92518
B73_Cluster_1142	Zm00001d035428,Zm00001d035434	B73	Nonsyntenic	Shared	PH207_Cluster_0863	11.7326
B73_Cluster_1143	Zm00001d035542,Zm00001d035543	B73	Maize1	Private	NA	11.7416
B73_Cluster_1144	Zm00001d035551,Zm00001d035552	B73	Maize1	Shared	PH207_Cluster_0868	11.7373
B73_Cluster_1145	Zm00001d035558,Zm00001d035559,Zm00001d035560,Zm00001d035561,Zm00001d035562	B73	Maize1	Shared	PH207_Cluster_0869	0.0764580901925,0.0618475114613,0.444972717789,11.7211619742
B73_Cluster_1146	Zm00001d035585,Zm00001d035587	B73	Nonsyntenic	Private	NA	9.06626
B73_Cluster_1147	Zm00001d035591,Zm00001d035592	B73	Nonsyntenic	Shared	PH207_Cluster_0871	11.7256
B73_Cluster_1148	Zm00001d035599,Zm00001d035600	B73	Maize1	Shared	PH207_Cluster_0872	0.269547
B73_Cluster_1149	Zm00001d035604,Zm00001d035605	B73	Maize1	Shared	PH207_Cluster_0873	11.7182
B73_Cluster_1150	Zm00001d035606,Zm00001d035607	B73	Nonsyntenic	NA	NA	NA
B73_Cluster_1151	Zm00001d035612,Zm00001d035614	B73	Maize1	Private	NA	0.200851
B73_Cluster_1152	Zm00001d035617,Zm00001d035618,Zm00001d035619	B73	Maize1	Private	NA	0.00330198599136,11.8246905777
B73_Cluster_1153	Zm00001d035624,Zm00001d035628	B73	Maize1	Private	NA	11.7767
B73_Cluster_1154	Zm00001d035625,Zm00001d035629	B73	Maize1	Private	NA	11.3268
B73_Cluster_1155	Zm00001d035638,Zm00001d035640	B73	Maize1	Private	NA	0.543249
B73_Cluster_1156	Zm00001d035659,Zm00001d035662,Zm00001d035663	B73	Maize1	Private	NA	0.00694107408071,0.00470317956983
B73_Cluster_1157	Zm00001d035670,Zm00001d035671	B73	Maize1	Shared	PH207_Cluster_0874	11.7269
B73_Cluster_1158	Zm00001d035680,Zm00001d035681,Zm00001d035683,Zm00001d035684	B73	Maize1	Private	NA	11.739694909,8.05034418214,0.554888245198
B73_Cluster_1159	Zm00001d035713,Zm00001d035714,Zm00001d035717	B73	Maize1	Shared	PH207_Cluster_0875	11.726991358,11.726991358
B73_Cluster_1160	Zm00001d035720,Zm00001d035722	B73	Maize1	Shared	PH207_Cluster_0876	8.58467
B73_Cluster_1161	Zm00001d035725,Zm00001d035726	B73	Maize1	Shared	PH207_Cluster_0877	11.7277
B73_Cluster_1162	Zm00001d035753,Zm00001d035756	B73	Maize1	Shared	PH207_Cluster_0880	11.7228
B73_Cluster_1163	Zm00001d035817,Zm00001d035818	B73	Maize2	Private	NA	4.89516
B73_Cluster_1164	Zm00001d035823,Zm00001d035833	B73	Nonsyntenic	Shared	PH207_Cluster_0882	11.937
B73_Cluster_1165	Zm00001d035879,Zm00001d035881	B73	Maize2	Shared	PH207_Cluster_0883	11.7318
B73_Cluster_1166	Zm00001d035901,Zm00001d035902	B73	Maize2	Private	NA	6.79448
B73_Cluster_1167	Zm00001d035974,Zm00001d035975	B73	Maize2	Shared	PH207_Cluster_0884	5.26907
B73_Cluster_1168	Zm00001d035978,Zm00001d035980	B73	Maize2	Private	NA	11.7661
B73_Cluster_1169	Zm00001d036066,Zm00001d036068,Zm00001d036069,Zm00001d036072	B73	Maize2	Shared	PH207_Cluster_0885	1.73990349695,11.7270539877,11.7270539877
B73_Cluster_1170	Zm00001d036077,Zm00001d036079	B73	Nonsyntenic	Private	NA	7.10294
B73_Cluster_1171	Zm00001d036097,Zm00001d036098	B73	Maize2	Private	NA	0.899821
B73_Cluster_1172	Zm00001d036110,Zm00001d036112	B73	Maize2	Private	NA	0.222612
B73_Cluster_1173	Zm00001d036139,Zm00001d036142	B73	Maize2	Shared	PH207_Cluster_0886	8.42076
B73_Cluster_1174	Zm00001d036237,Zm00001d036238,Zm00001d036241	B73	Maize2	Shared	PH207_Cluster_0888	0.137052984765,11.7190981878
B73_Cluster_1175	Zm00001d036261,Zm00001d036262,Zm00001d036263	B73	Nonsyntenic	Private	NA	11.7922897741,11.7922897741
B73_Cluster_1176	Zm00001d036264,Zm00001d036266	B73	Nonsyntenic	Shared	PH207_Cluster_0892	11.7215
B73_Cluster_1177	Zm00001d036267,Zm00001d036270,Zm00001d036272	B73	Maize2	Shared	PH207_Cluster_0893	0.450571944931,0.271878651141
B73_Cluster_1178	Zm00001d036274,Zm00001d036277	B73	Nonsyntenic	NA	NA	NA
B73_Cluster_1179	Zm00001d036275,Zm00001d036278	B73	Maize2	Shared	PH207_Cluster_0894	0.733598
B73_Cluster_1180	Zm00001d036311,Zm00001d036324	B73	Nonsyntenic	Private	NA	7.17963
B73_Cluster_1181	Zm00001d036366,Zm00001d036370	B73	Maize2	Shared	PH207_Cluster_0896	11.71
B73_Cluster_1182	Zm00001d036373,Zm00001d036376	B73	Nonsyntenic	NA	NA	NA
B73_Cluster_1183	Zm00001d036375,Zm00001d036378	B73	Nonsyntenic	Private	NA	0.895116
B73_Cluster_1184	Zm00001d036464,Zm00001d036467	B73	Maize2	Private	NA	0.121038
B73_Cluster_1185	Zm00001d036465,Zm00001d036468	B73	Maize2	Private	NA	0.0069895
B73_Cluster_1186	Zm00001d036541,Zm00001d036542	B73	Maize2	Private	NA	11.7181
B73_Cluster_1187	Zm00001d036565,Zm00001d036567,Zm00001d036568	B73	Maize2	Shared	PH207_Cluster_0898	5.80117569294,7.77351216553
B73_Cluster_1188	Zm00001d036594,Zm00001d036595	B73	Maize2	Private	NA	0.654004
B73_Cluster_1189	Zm00001d036621,Zm00001d036622	B73	Maize2	Private	NA	11.7258
B73_Cluster_1190	Zm00001d036641,Zm00001d036643,Zm00001d036646,Zm00001d036647	B73	Maize2	Shared	PH207_Cluster_0899	11.7422527234,11.7422527234,2.15544446557
B73_Cluster_1191	Zm00001d036655,Zm00001d036660,Zm00001d036663,Zm00001d036667	B73	Maize2	Shared	PH207_Cluster_0900	8.25493593949,8.25493593949,11.7234980217
B73_Cluster_1192	Zm00001d036664,Zm00001d036666	B73	Nonsyntenic	NA	NA	NA
B73_Cluster_1193	Zm00001d036760,Zm00001d036761	B73	Maize2	Shared	PH207_Cluster_0901	11.7327
B73_Cluster_1194	Zm00001d036762,Zm00001d036763	B73	Maize2	Private	PH207_Cluster_0902	11.7258
B73_Cluster_1195	Zm00001d036791,Zm00001d036792	B73	Maize2	Private	NA	7.65301
B73_Cluster_1196	Zm00001d036801,Zm00001d036804	B73	Maize2	Shared	PH207_Cluster_0904	11.7208
B73_Cluster_1197	Zm00001d036815,Zm00001d036816,Zm00001d036818,Zm00001d036819,Zm00001d036820,Zm00001d036821,Zm00001d036822,Zm00001d036823,Zm00001d036824	B73	Nonsyntenic	Shared	PH207_Cluster_0905	0.301229814628,11.7365046072,11.7365046072,1.07817220224,0.88358698271,0.475419353859,0.708743829063,0.985859975637
B73_Cluster_1198	Zm00001d036840,Zm00001d036845,Zm00001d036847	B73	Nonsyntenic	Private	NA	11.7913756183,3.85723180853
B73_Cluster_1199	Zm00001d036841,Zm00001d036842,Zm00001d036843	B73	Nonsyntenic	NA	NA	NA
B73_Cluster_1200	Zm00001d036853,Zm00001d036855,Zm00001d036856,Zm00001d036864,Zm00001d036865	B73	Nonsyntenic	Private	NA	0.00160772074751,0.00160772074751,0.00160772074751,11.8960847518
B73_Cluster_1201	Zm00001d036936,Zm00001d036940	B73	Maize2	Shared	PH207_Cluster_0909	1.93004
B73_Cluster_1202	Zm00001d036941,Zm00001d036942	B73	Maize2	Private	NA	2.30265
B73_Cluster_1203	Zm00001d037005,Zm00001d037008,Zm00001d037009	B73	Maize2	Shared	PH207_Cluster_0910	11.7217485637,11.7217485637
B73_Cluster_1204	Zm00001d037019,Zm00001d037023	B73	Maize2	Private	NA	11.7163
B73_Cluster_1205	Zm00001d037042,Zm00001d037043	B73	Maize2	Shared	PH207_Cluster_0914	11.7089
B73_Cluster_1206	Zm00001d037075,Zm00001d037077	B73	Nonsyntenic	NA	NA	NA
B73_Cluster_1207	Zm00001d037089,Zm00001d037091	B73	Maize2	Shared	PH207_Cluster_0911	4.61965
B73_Cluster_1208	Zm00001d037153,Zm00001d037155	B73	Maize2	Shared	PH207_Cluster_0913	11.7048
B73_Cluster_1209	Zm00001d037204,Zm00001d037205	B73	Maize2	Shared	PH207_Cluster_0915	5.9901
B73_Cluster_1210	Zm00001d037244,Zm00001d037245	B73	Maize2	Private	NA	3.75625
B73_Cluster_1211	Zm00001d037248,Zm00001d037249,Zm00001d037250	B73	Maize2	Private	NA	2.49933419145,11.7193497304
B73_Cluster_1212	Zm00001d037280,Zm00001d037281	B73	Maize2	Shared	PH207_Cluster_0916	11.7212
B73_Cluster_1213	Zm00001d037301,Zm00001d037303	B73	Maize2	Private	NA	2.08821
B73_Cluster_1214	Zm00001d037316,Zm00001d037317	B73	Nonsyntenic	Private	NA	0.560009
B73_Cluster_1215	Zm00001d037382,Zm00001d037383,Zm00001d037384	B73	Maize2	Shared	PH207_Cluster_0918	11.7305303049,3.5779401997
B73_Cluster_1216	Zm00001d037386,Zm00001d037389	B73	Maize2	Shared	PH207_Cluster_0919	9.79491
B73_Cluster_1217	Zm00001d037397,Zm00001d037398	B73	Maize2	Shared	PH207_Cluster_0920	6.44345
B73_Cluster_1218	Zm00001d037409,Zm00001d037411	B73	Maize2	Shared	PH207_Cluster_0921	10.2366
B73_Cluster_1219	Zm00001d037415,Zm00001d037417	B73	Maize2	Private	NA	11.7381
B73_Cluster_1220	Zm00001d037518,Zm00001d037519	B73	Maize1	Shared	PH207_Cluster_0922	6.14789
B73_Cluster_1221	Zm00001d037547,Zm00001d037550	B73	Maize1	Shared	PH207_Cluster_0923	11.7383
B73_Cluster_1222	Zm00001d037579,Zm00001d037580	B73	Maize1	Private	NA	11.746
B73_Cluster_1223	Zm00001d037608,Zm00001d037610	B73	Nonsyntenic	Shared	PH207_Cluster_0924	11.7585
B73_Cluster_1224	Zm00001d037611,Zm00001d037619	B73	Maize1	Shared	PH207_Cluster_0925	11.5559
B73_Cluster_1225	Zm00001d037631,Zm00001d037632	B73	Maize1	Private	NA	11.8193
B73_Cluster_1226	Zm00001d037653,Zm00001d037656	B73	Nonsyntenic	Shared	PH207_Cluster_0927	0.000566497
B73_Cluster_1227	Zm00001d037666,Zm00001d037672	B73	Maize1	Private	NA	2.59636
B73_Cluster_1228	Zm00001d037680,Zm00001d037681	B73	Maize1	Shared	PH207_Cluster_0928	11.7248
B73_Cluster_1229	Zm00001d037700,Zm00001d037717	B73	Maize1	Shared	PH207_Cluster_0929	11.7224
B73_Cluster_1230	Zm00001d037725,Zm00001d037727	B73	Maize1	Shared	PH207_Cluster_0931	0.534966
B73_Cluster_1231	Zm00001d037740,Zm00001d037741,Zm00001d037742	B73	Maize1	Shared	PH207_Cluster_0932	11.7266723248,11.7266723248
B73_Cluster_1232	Zm00001d037873,Zm00001d037875,Zm00001d037877,Zm00001d037882	B73	Nonsyntenic	Shared	PH207_Cluster_0935	0.00160369580777,0.00038298768293,11.8907522764
B73_Cluster_1233	Zm00001d037884,Zm00001d037886	B73	Nonsyntenic	Private	NA	11.7429
B73_Cluster_1234	Zm00001d037909,Zm00001d037914	B73	Maize1	Private	NA	11.7973
B73_Cluster_1235	Zm00001d037943,Zm00001d037945	B73	Maize1	Shared	PH207_Cluster_0938	11.7097
B73_Cluster_1236	Zm00001d037961,Zm00001d037962	B73	Maize1	Shared	PH207_Cluster_0939	11.7336
B73_Cluster_1237	Zm00001d037985,Zm00001d037988	B73	Maize1	Shared	PH207_Cluster_0941	11.8658
B73_Cluster_1238	Zm00001d037994,Zm00001d037998,Zm00001d037999	B73	Maize1	Shared	PH207_Cluster_0942	11.7180120348,1.40378070991
B73_Cluster_1239	Zm00001d038010,Zm00001d038025	B73	Nonsyntenic	NA	NA	NA
B73_Cluster_1240	Zm00001d038049,Zm00001d038052	B73	Maize1	Shared	PH207_Cluster_0943	0.017171
B73_Cluster_1241	Zm00001d038065,Zm00001d038066	B73	Maize1	Shared	PH207_Cluster_0944	11.7506
B73_Cluster_1242	Zm00001d038079,Zm00001d038080	B73	Maize1	Private	NA	8.24445
B73_Cluster_1243	Zm00001d038084,Zm00001d038085	B73	Maize1	Private	NA	5.00379
B73_Cluster_1244	Zm00001d038177,Zm00001d038178	B73	Maize1	Private	NA	5.57728
B73_Cluster_1245	Zm00001d038179,Zm00001d038180,Zm00001d038181,Zm00001d038185,Zm00001d038186	B73	Maize1	Shared	PH207_Cluster_0945	0.756974220639,2.9257950625,5.09132879456,5.09132879456
B73_Cluster_1246	Zm00001d038255,Zm00001d038256	B73	Nonsyntenic	NA	NA	NA
B73_Cluster_1247	Zm00001d038271,Zm00001d038272	B73	Maize1	Shared	PH207_Cluster_0949	11.7234
B73_Cluster_1248	Zm00001d038283,Zm00001d038284	B73	Maize1	Shared	PH207_Cluster_0950	11.7246
B73_Cluster_1249	Zm00001d038333,Zm00001d038334	B73	Maize1	Private	NA	4.5467
B73_Cluster_1250	Zm00001d038401,Zm00001d038403	B73	Maize1	Private	NA	10.7574
B73_Cluster_1251	Zm00001d038413,Zm00001d038414,Zm00001d038415,Zm00001d038418,Zm00001d038424,Zm00001d038425,Zm00001d038428,Zm00001d038429	B73	Nonsyntenic	Shared	PH207_Cluster_0952	6.84480549597,0.807063915454,11.7394707954,11.7394707954,4.21598302986,4.91112170519,2.6895131561
B73_Cluster_1252	Zm00001d038452,Zm00001d038459	B73	Maize1	Shared	PH207_Cluster_0953	11.7484
B73_Cluster_1253	Zm00001d038453,Zm00001d038460	B73	Maize1	Private	NA	11.7241
B73_Cluster_1254	Zm00001d038523,Zm00001d038526	B73	Maize1	Private	NA	11.7332
B73_Cluster_1255	Zm00001d038543,Zm00001d038545	B73	Maize1	Private	NA	11.7169
B73_Cluster_1256	Zm00001d038549,Zm00001d038551	B73	Nonsyntenic	Shared	PH207_Cluster_0958	11.7441
B73_Cluster_1257	Zm00001d038584,Zm00001d038585	B73	Maize1	Private	NA	5.96908
B73_Cluster_1258	Zm00001d038598,Zm00001d038599	B73	Maize1	Private	NA	11.7522
B73_Cluster_1259	Zm00001d038604,Zm00001d038605	B73	Maize1	Shared	PH207_Cluster_0959	11.7296
B73_Cluster_1260	Zm00001d038633,Zm00001d038634,Zm00001d038640	B73	Nonsyntenic	Shared	PH207_Cluster_0960	11.7261766191,2.79431958814
B73_Cluster_1261	Zm00001d038696,Zm00001d038697	B73	Maize1	Private	NA	11.7344
B73_Cluster_1262	Zm00001d038699,Zm00001d038700,Zm00001d038702,Zm00001d038703	B73	Maize1	Shared	PH207_Cluster_0961	3.44201308137,8.07517500571,8.07517500571
B73_Cluster_1263	Zm00001d038740,Zm00001d038741	B73	Maize1	Shared	PH207_Cluster_0962	0.371733
B73_Cluster_1264	Zm00001d038763,Zm00001d038764,Zm00001d038765	B73	Maize1	Shared	PH207_Cluster_0964	5.27637496454,4.438803194
B73_Cluster_1265	Zm00001d038811,Zm00001d038812,Zm00001d038813	B73	Maize1	Private	NA	3.56627783499,3.56627783499
B73_Cluster_1266	Zm00001d038830,Zm00001d038831	B73	Maize1	Private	NA	11.7401
B73_Cluster_1267	Zm00001d038874,Zm00001d038875	B73	Maize1	Private	NA	1.44456
B73_Cluster_1268	Zm00001d038883,Zm00001d038884	B73	Maize1	Shared	PH207_Cluster_0966	11.738
B73_Cluster_1269	Zm00001d038887,Zm00001d038889	B73	Maize1	Shared	PH207_Cluster_0967	11.756
B73_Cluster_1270	Zm00001d038911,Zm00001d038913	B73	Maize1	Shared	PH207_Cluster_0968	11.749
B73_Cluster_1271	Zm00001d038918,Zm00001d038919,Zm00001d038920	B73	Maize1	Private	NA	5.18207913739,5.18207913739
B73_Cluster_1272	Zm00001d038968,Zm00001d038969	B73	Maize1	Private	NA	10.3683
B73_Cluster_1273	Zm00001d039022,Zm00001d039026	B73	Maize1	Shared	PH207_Cluster_0969	0.906315
B73_Cluster_1274	Zm00001d039051,Zm00001d039052	B73	Maize1	Shared	PH207_Cluster_0970	0.713617
B73_Cluster_1275	Zm00001d039057,Zm00001d039058	B73	Maize1	Private	NA	11.732
B73_Cluster_1276	Zm00001d039087,Zm00001d039088	B73	Maize1	Shared	PH207_Cluster_0972	11.7517
B73_Cluster_1277	Zm00001d039090,Zm00001d039091	B73	Maize1	Shared	PH207_Cluster_0973	0.00793814
B73_Cluster_1278	Zm00001d039098,Zm00001d039099	B73	Maize1	Private	PH207_Cluster_0971	10.7432
B73_Cluster_1279	Zm00001d039112,Zm00001d039113	B73	Maize1	Private	NA	3.94044
B73_Cluster_1280	Zm00001d039118,Zm00001d039119	B73	Maize1	Shared	PH207_Cluster_0974	2.63653
B73_Cluster_1281	Zm00001d039121,Zm00001d039123	B73	Maize1	Private	NA	1.61114
B73_Cluster_1282	Zm00001d039176,Zm00001d039180	B73	Maize1	Shared	PH207_Cluster_0976	11.7309
B73_Cluster_1283	Zm00001d039183,Zm00001d039184	B73	Maize1	Private	PH207_Cluster_0977	11.0018
B73_Cluster_1284	Zm00001d039226,Zm00001d039230	B73	Nonsyntenic	NA	NA	NA
B73_Cluster_1285	Zm00001d039228,Zm00001d039229	B73	Nonsyntenic	NA	NA	NA
B73_Cluster_1286	Zm00001d039280,Zm00001d039285	B73	Maize1	Private	NA	0.715669
B73_Cluster_1287	Zm00001d039345,Zm00001d039346	B73	Maize1	Private	NA	10.7491
B73_Cluster_1288	Zm00001d039375,Zm00001d039377	B73	Nonsyntenic	Private	NA	11.7622
B73_Cluster_1289	Zm00001d039392,Zm00001d039393	B73	Maize1	Private	NA	0.0281653
B73_Cluster_1290	Zm00001d039419,Zm00001d039420,Zm00001d039423	B73	Maize1	Private	PH207_Cluster_0430	2.39045913161,11.7219741198
B73_Cluster_1291	Zm00001d039514,Zm00001d039517	B73	Maize1	Shared	PH207_Cluster_0431	1.49271
B73_Cluster_1292	Zm00001d039563,Zm00001d039564	B73	Nonsyntenic	Private	NA	2.78714
B73_Cluster_1293	Zm00001d039569,Zm00001d039571,Zm00001d039572,Zm00001d039573,Zm00001d039574	B73	Maize1	Private	NA	0.0894236108581,4.90233524575,0.813588343019,4.13111354061
B73_Cluster_1294	Zm00001d039602,Zm00001d039604	B73	Nonsyntenic	NA	NA	NA
B73_Cluster_1295	Zm00001d039642,Zm00001d039643,Zm00001d039644	B73	Nonsyntenic	Shared	PH207_Cluster_0434	11.7054031214,1.01925296254
B73_Cluster_1296	Zm00001d039679,Zm00001d039680	B73	Maize1	Private	NA	0.00488168
B73_Cluster_1297	Zm00001d039697,Zm00001d039698	B73	Nonsyntenic	Shared	PH207_Cluster_0436	7.2859
B73_Cluster_1298	Zm00001d039711,Zm00001d039712	B73	Maize1	Shared	PH207_Cluster_0437	3.69631
B73_Cluster_1299	Zm00001d039729,Zm00001d039731	B73	Maize1	Private	NA	11.7229
B73_Cluster_1300	Zm00001d039749,Zm00001d039754	B73	Maize1	Shared	PH207_Cluster_0438	11.7254
B73_Cluster_1301	Zm00001d039795,Zm00001d039799	B73	Maize1	Private	NA	0.457507
B73_Cluster_1302	Zm00001d039796,Zm00001d039802,Zm00001d039803,Zm00001d039805,Zm00001d039807,Zm00001d039817,Zm00001d039818	B73	Maize1	Shared	PH207_Cluster_0439	3.70205011751,6.37556483351,6.37556483351,4.94840784566,11.7222762993,11.7222762993
B73_Cluster_1303	Zm00001d039822,Zm00001d039824	B73	Maize1	Shared	PH207_Cluster_0440	6.9289
B73_Cluster_1304	Zm00001d039833,Zm00001d039837,Zm00001d039840	B73	Nonsyntenic	Shared	PH207_Cluster_0441	11.8963026769,11.8963026769
B73_Cluster_1305	Zm00001d039895,Zm00001d039898	B73	Maize1	Shared	PH207_Cluster_0442	11.7351
B73_Cluster_1306	Zm00001d039920,Zm00001d039926,Zm00001d039931	B73	Maize1	Shared	PH207_Cluster_0443	3.26946068853,2.04238507364
B73_Cluster_1307	Zm00001d039921,Zm00001d039923	B73	Nonsyntenic	NA	NA	NA
B73_Cluster_1308	Zm00001d039922,Zm00001d039924,Zm00001d039925,Zm00001d039927,Zm00001d039928,Zm00001d039929,Zm00001d039930	B73	Maize1	Private	NA	11.7209540062,11.7209540062,11.7209540062,3.59693946269,11.7209540062,6.81441067672
B73_Cluster_1309	Zm00001d039932,Zm00001d039933,Zm00001d039936,Zm00001d039941,Zm00001d039942	B73	Maize1	Shared	PH207_Cluster_0444	4.30574816102,1.42013840944,11.7374664648,11.7374664648
B73_Cluster_1310	Zm00001d039946,Zm00001d039958	B73	Maize1	Shared	PH207_Cluster_0445	9.46852
B73_Cluster_1311	Zm00001d039947,Zm00001d039951,Zm00001d039952,Zm00001d039956	B73	Maize1	Shared	PH207_Cluster_0446	10.3583533751,11.7126829629,0.617176155894
B73_Cluster_1312	Zm00001d039969,Zm00001d039970	B73	Maize1	Shared	PH207_Cluster_0447	5.65257
B73_Cluster_1313	Zm00001d040027,Zm00001d040028,Zm00001d040029	B73	Maize1	Shared	PH207_Cluster_0448	11.7185525041,11.7185525041
B73_Cluster_1314	Zm00001d040034,Zm00001d040035	B73	Maize1	Private	NA	11.7347
B73_Cluster_1315	Zm00001d040059,Zm00001d040060,Zm00001d040064,Zm00001d040066,Zm00001d040067,Zm00001d040071,Zm00001d040075	B73	Maize1	Shared	PH207_Cluster_0449	11.7250471238,1.89563791784,11.7250471238,11.7250471238,0.82891424851,5.41305299824
B73_Cluster_1316	Zm00001d040110,Zm00001d040111	B73	Maize1	Private	NA	11.715
B73_Cluster_1317	Zm00001d040148,Zm00001d040152	B73	Maize1	Shared	PH207_Cluster_0451	11.7206
B73_Cluster_1318	Zm00001d040161,Zm00001d040162	B73	Maize1	Private	NA	11.8043
B73_Cluster_1319	Zm00001d040210,Zm00001d040211,Zm00001d040212	B73	Maize1	Shared	PH207_Cluster_0453	7.8817515391,11.7208762877
B73_Cluster_1320	Zm00001d040247,Zm00001d040249	B73	Maize1	Shared	PH207_Cluster_0454	7.76012
B73_Cluster_1321	Zm00001d040252,Zm00001d040253	B73	Maize1	Shared	PH207_Cluster_0455	11.8164
B73_Cluster_1322	Zm00001d040299,Zm00001d040300	B73	Nonsyntenic	NA	NA	NA
B73_Cluster_1323	Zm00001d040301,Zm00001d040302	B73	Maize1	Shared	PH207_Cluster_0456	8.2619
B73_Cluster_1324	Zm00001d040423,Zm00001d040426,Zm00001d040428	B73	Maize1	Shared	PH207_Cluster_0458	9.32427946124,11.7256351378
B73_Cluster_1325	Zm00001d040479,Zm00001d040483,Zm00001d040497	B73	Nonsyntenic	Shared	PH207_Cluster_0459	11.7228079576,11.7228079576
B73_Cluster_1326	Zm00001d040481,Zm00001d040493,Zm00001d040501	B73	Nonsyntenic	Shared	PH207_Cluster_0460	11.7397404328,3.18846869721
B73_Cluster_1327	Zm00001d040548,Zm00001d040549	B73	Maize1	Private	NA	11.717
B73_Cluster_1328	Zm00001d040578,Zm00001d040579,Zm00001d040581	B73	Maize1	Shared	PH207_Cluster_0461	6.49519005872,9.25347154455
B73_Cluster_1329	Zm00001d040608,Zm00001d040609	B73	Nonsyntenic	Shared	PH207_Cluster_0462	11.8074
B73_Cluster_1330	Zm00001d040638,Zm00001d040639	B73	Maize1	Shared	PH207_Cluster_0463	0.674471
B73_Cluster_1331	Zm00001d040649,Zm00001d040650	B73	Maize1	Private	NA	0.093575
B73_Cluster_1332	Zm00001d040659,Zm00001d040660	B73	Maize1	Shared	PH207_Cluster_0464	11.7402
B73_Cluster_1333	Zm00001d040692,Zm00001d040694	B73	Nonsyntenic	Private	PH207_Cluster_0465	11.7254
B73_Cluster_1334	Zm00001d040702,Zm00001d040705	B73	Maize1	Shared	PH207_Cluster_0466	8.90605
B73_Cluster_1335	Zm00001d040730,Zm00001d040731,Zm00001d040733	B73	Maize1	Shared	PH207_Cluster_0467	6.13914189637,11.7164754412
B73_Cluster_1336	Zm00001d040772,Zm00001d040773	B73	Nonsyntenic	Shared	PH207_Cluster_0469	11.73
B73_Cluster_1337	Zm00001d040785,Zm00001d040786,Zm00001d040787	B73	Maize1	Private	NA	11.7210224213,11.7210224213
B73_Cluster_1338	Zm00001d040818,Zm00001d040820	B73	Maize1	Shared	PH207_Cluster_0470	11.7638
B73_Cluster_1339	Zm00001d040836,Zm00001d040837	B73	Maize1	Shared	PH207_Cluster_0471	11.8159
B73_Cluster_1340	Zm00001d040844,Zm00001d040847	B73	Nonsyntenic	Private	NA	2.4078
B73_Cluster_1341	Zm00001d040911,Zm00001d040912	B73	Nonsyntenic	Shared	PH207_Cluster_0473	7.47276
B73_Cluster_1342	Zm00001d040924,Zm00001d040925	B73	Nonsyntenic	NA	NA	NA
B73_Cluster_1343	Zm00001d041007,Zm00001d041013	B73	Nonsyntenic	NA	NA	NA
B73_Cluster_1344	Zm00001d041086,Zm00001d041087	B73	Nonsyntenic	Private	NA	11.7741
B73_Cluster_1345	Zm00001d041124,Zm00001d041136	B73	Maize2	Private	NA	0.323365
B73_Cluster_1346	Zm00001d041168,Zm00001d041173	B73	Nonsyntenic	Shared	PH207_Cluster_0475	2.22548
B73_Cluster_1347	Zm00001d041232,Zm00001d041236	B73	Maize2	Shared	PH207_Cluster_0474	10.5418
B73_Cluster_1348	Zm00001d041291,Zm00001d041293	B73	Maize2	Private	NA	11.7303
B73_Cluster_1349	Zm00001d041403,Zm00001d041404	B73	Maize2	Private	NA	11.8085
B73_Cluster_1350	Zm00001d041416,Zm00001d041418	B73	Maize2	Shared	PH207_Cluster_0478	3.79599
B73_Cluster_1351	Zm00001d041450,Zm00001d041453	B73	Maize2	Shared	PH207_Cluster_0479	0.0913525
B73_Cluster_1352	Zm00001d041520,Zm00001d041521	B73	Nonsyntenic	NA	NA	NA
B73_Cluster_1353	Zm00001d041551,Zm00001d041553	B73	Maize2	Private	NA	11.7568
B73_Cluster_1354	Zm00001d041559,Zm00001d041563	B73	Nonsyntenic	NA	NA	NA
B73_Cluster_1355	Zm00001d041570,Zm00001d041571	B73	Maize2	Shared	PH207_Cluster_0483	11.7169
B73_Cluster_1356	Zm00001d041656,Zm00001d041657,Zm00001d041662,Zm00001d041663	B73	Nonsyntenic	Private	PH207_Cluster_0484	11.9007617994,0.000308821037195,11.9007617994
B73_Cluster_1357	Zm00001d041678,Zm00001d041684	B73	Maize2	Shared	PH207_Cluster_0485	11.724
B73_Cluster_1358	Zm00001d041776,Zm00001d041777	B73	Nonsyntenic	Shared	PH207_Cluster_0487	0.00128539
B73_Cluster_1359	Zm00001d041806,Zm00001d041808	B73	Nonsyntenic	NA	NA	NA
B73_Cluster_1360	Zm00001d041810,Zm00001d041811	B73	Nonsyntenic	Private	NA	11.7349
B73_Cluster_1361	Zm00001d041836,Zm00001d041842	B73	Maize2	Shared	PH207_Cluster_0488	0.940533
B73_Cluster_1362	Zm00001d041904,Zm00001d041907	B73	Nonsyntenic	Private	NA	11.7556
B73_Cluster_1363	Zm00001d041927,Zm00001d041929	B73	Nonsyntenic	Shared	PH207_Cluster_0490	10.4986
B73_Cluster_1364	Zm00001d041984,Zm00001d041985,Zm00001d041987	B73	Maize1	Shared	PH207_Cluster_0491	11.7270429979,11.7270429979
B73_Cluster_1365	Zm00001d041996,Zm00001d041997	B73	Nonsyntenic	Private	NA	11.7256
B73_Cluster_1366	Zm00001d042019,Zm00001d042022	B73	Maize1	Shared	PH207_Cluster_0493	9.34253
B73_Cluster_1367	Zm00001d042095,Zm00001d042096,Zm00001d042098,Zm00001d042099,Zm00001d042102,Zm00001d042104	B73	Maize1	Shared	PH207_Cluster_0496	4.39713166793,11.7294944887,11.7294944887,9.73849086267,7.27857420225
B73_Cluster_1368	Zm00001d042107,Zm00001d042108	B73	Maize1	Shared	PH207_Cluster_0496	11.7023
B73_Cluster_1369	Zm00001d042122,Zm00001d042123,Zm00001d042125	B73	Maize1	Shared	PH207_Cluster_0497	11.7402828375,11.7402828375
B73_Cluster_1370	Zm00001d042128,Zm00001d042130	B73	Maize1	Shared	PH207_Cluster_0498	11.7005
B73_Cluster_1371	Zm00001d042134,Zm00001d042135	B73	Maize1	Shared	PH207_Cluster_0499	11.7231
B73_Cluster_1372	Zm00001d042138,Zm00001d042140,Zm00001d042141,Zm00001d042143	B73	Maize1	Shared	PH207_Cluster_0500	11.7484188596,1.39130657102,11.7484188596
B73_Cluster_1373	Zm00001d042157,Zm00001d042158	B73	Maize1	Private	PH207_Cluster_0501	9.03788
B73_Cluster_1374	Zm00001d042160,Zm00001d042163	B73	Nonsyntenic	Private	NA	11.5526
B73_Cluster_1375	Zm00001d042169,Zm00001d042173	B73	Maize1	Private	NA	1.63784
B73_Cluster_1376	Zm00001d042172,Zm00001d042175,Zm00001d042178	B73	Maize1	Private	NA	11.7246937819,11.7246937819
B73_Cluster_1377	Zm00001d042196,Zm00001d042197	B73	Maize1	Private	NA	11.7352
B73_Cluster_1378	Zm00001d042204,Zm00001d042207,Zm00001d042209,Zm00001d042210	B73	Maize1	Shared	PH207_Cluster_0504	0.459538994763,11.7348991597,10.6401590195
B73_Cluster_1379	Zm00001d042226,Zm00001d042229,Zm00001d042231	B73	Maize1	Private	NA	11.7102370644,11.7102370644
B73_Cluster_1380	Zm00001d042237,Zm00001d042239	B73	Maize1	Shared	PH207_Cluster_0505	7.60977
B73_Cluster_1381	Zm00001d042274,Zm00001d042275	B73	Maize1	Shared	PH207_Cluster_0506	11.724
B73_Cluster_1382	Zm00001d042276,Zm00001d042279,Zm00001d042281	B73	Maize1	Shared	PH207_Cluster_0507	0.483643442529,2.60811184295
B73_Cluster_1383	Zm00001d042315,Zm00001d042317	B73	Maize1	Shared	PH207_Cluster_0508	11.8396
B73_Cluster_1384	Zm00001d042336,Zm00001d042337	B73	Maize1	Shared	PH207_Cluster_0509	11.7194
B73_Cluster_1385	Zm00001d042380,Zm00001d042389	B73	Maize1	Shared	PH207_Cluster_0510	6.30639
B73_Cluster_1386	Zm00001d042400,Zm00001d042410	B73	Nonsyntenic	Private	NA	11.8374
B73_Cluster_1387	Zm00001d042511,Zm00001d042512	B73	Maize1	Shared	PH207_Cluster_0511	11.7172
B73_Cluster_1388	Zm00001d042540,Zm00001d042541	B73	Maize1	Private	NA	0.496493
B73_Cluster_1389	Zm00001d042561,Zm00001d042562,Zm00001d042563,Zm00001d042564,Zm00001d042568	B73	Maize1	Shared	PH207_Cluster_0512	8.16603521315,2.50862765056,11.7271771821,8.49037587296
B73_Cluster_1390	Zm00001d042654,Zm00001d042656	B73	Maize1	Private	NA	4.44835
B73_Cluster_1391	Zm00001d042680,Zm00001d042683,Zm00001d042684	B73	Maize1	Shared	PH207_Cluster_0514	10.5051488897,11.7287888313
B73_Cluster_1392	Zm00001d042739,Zm00001d042740	B73	Maize1	Shared	PH207_Cluster_0515	11.7351
B73_Cluster_1393	Zm00001d042748,Zm00001d042749,Zm00001d042750	B73	Maize1	Shared	PH207_Cluster_0516	7.484932094,11.728582968
B73_Cluster_1394	Zm00001d042768,Zm00001d042769,Zm00001d042770,Zm00001d042771	B73	Maize1	Shared	PH207_Cluster_0517	6.2983925166,11.7214146868,8.68975225315
B73_Cluster_1395	Zm00001d042789,Zm00001d042791	B73	Nonsyntenic	NA	NA	NA
B73_Cluster_1396	Zm00001d042796,Zm00001d042799	B73	Maize1	Shared	PH207_Cluster_0518	0.33368
B73_Cluster_1397	Zm00001d042868,Zm00001d042869	B73	Maize1	Shared	PH207_Cluster_0519	7.11092
B73_Cluster_1398	Zm00001d042901,Zm00001d042905,Zm00001d042906	B73	Maize1	Shared	PH207_Cluster_0520	11.7376951985,10.3130544435
B73_Cluster_1399	Zm00001d042933,Zm00001d042934	B73	Maize1	Shared	PH207_Cluster_0521	11.7221
B73_Cluster_1400	Zm00001d042988,Zm00001d042989	B73	Maize1	Private	NA	7.78461
B73_Cluster_1401	Zm00001d043000,Zm00001d043003	B73	Nonsyntenic	Private	NA	11.81
B73_Cluster_1402	Zm00001d043001,Zm00001d043004	B73	Maize1	Private	NA	7.77459
B73_Cluster_1403	Zm00001d043062,Zm00001d043063,Zm00001d043066	B73	Maize1	Private	NA	11.7366833726,4.6024844301
B73_Cluster_1404	Zm00001d043126,Zm00001d043129	B73	Maize1	Shared	PH207_Cluster_0525	11.7194
B73_Cluster_1405	Zm00001d043165,Zm00001d043166	B73	Maize1	Private	NA	0.319289
B73_Cluster_1406	Zm00001d043204,Zm00001d043205	B73	Maize1	Shared	PH207_Cluster_0526	11.7057
B73_Cluster_1407	Zm00001d043211,Zm00001d043216	B73	Maize1	Shared	PH207_Cluster_0527	11.7517
B73_Cluster_1408	Zm00001d043220,Zm00001d043221	B73	Maize1	Shared	PH207_Cluster_0528	11.7219
B73_Cluster_1409	Zm00001d043252,Zm00001d043253,Zm00001d043256	B73	Maize1	Shared	PH207_Cluster_0529	0.940960240051,3.42715800731
B73_Cluster_1410	Zm00001d043289,Zm00001d043290	B73	Maize1	Private	NA	0.00954444
B73_Cluster_1411	Zm00001d043374,Zm00001d043375	B73	Maize1	Shared	PH207_Cluster_0531	10.9466
B73_Cluster_1412	Zm00001d043468,Zm00001d043469	B73	Maize1	Shared	PH207_Cluster_0532	1.00907
B73_Cluster_1413	Zm00001d043517,Zm00001d043519	B73	Maize1	Private	NA	11.7416
B73_Cluster_1414	Zm00001d043544,Zm00001d043547	B73	Maize1	Private	NA	11.7241
B73_Cluster_1415	Zm00001d043590,Zm00001d043591	B73	Maize1	Shared	PH207_Cluster_0534	4.65408
B73_Cluster_1416	Zm00001d043625,Zm00001d043632	B73	Maize1	Shared	PH207_Cluster_0535	11.7426
B73_Cluster_1417	Zm00001d043641,Zm00001d043643,Zm00001d043644	B73	Nonsyntenic	NA	NA	NA
B73_Cluster_1418	Zm00001d043650,Zm00001d043651	B73	Maize1	Shared	PH207_Cluster_0536	11.71
B73_Cluster_1419	Zm00001d043682,Zm00001d043683	B73	Maize1	Private	NA	9.40908
B73_Cluster_1420	Zm00001d043714,Zm00001d043716,Zm00001d043719	B73	Nonsyntenic	Shared	PH207_Cluster_0538	11.7267865514,11.7267865514
B73_Cluster_1421	Zm00001d043738,Zm00001d043740,Zm00001d043741,Zm00001d043742	B73	Maize1	Private	NA	2.72194908105,11.7228839984,4.64688042208
B73_Cluster_1422	Zm00001d043762,Zm00001d043766	B73	Maize1	Shared	PH207_Cluster_0541	11.724
B73_Cluster_1423	Zm00001d043787,Zm00001d043789,Zm00001d043795	B73	Maize1	Private	NA	11.7158540196,7.5494740169
B73_Cluster_1424	Zm00001d043792,Zm00001d043793,Zm00001d043794	B73	Nonsyntenic	NA	NA	NA
B73_Cluster_1425	Zm00001d043798,Zm00001d043799	B73	Maize1	Shared	PH207_Cluster_0543	8.39836
B73_Cluster_1426	Zm00001d043806,Zm00001d043808	B73	Maize1	Private	NA	9.94829
B73_Cluster_1427	Zm00001d043870,Zm00001d043871	B73	Maize1	Shared	PH207_Cluster_0544	11.7451
B73_Cluster_1428	Zm00001d043882,Zm00001d043884	B73	Nonsyntenic	Shared	PH207_Cluster_0545	11.7093
B73_Cluster_1429	Zm00001d043927,Zm00001d043928	B73	Maize1	Private	NA	11.8283
B73_Cluster_1430	Zm00001d043975,Zm00001d043980,Zm00001d043981	B73	Maize1	Shared	PH207_Cluster_0547	7.52747534848,11.7267291644
B73_Cluster_1431	Zm00001d044013,Zm00001d044014	B73	Maize1	Private	NA	11.8274
B73_Cluster_1432	Zm00001d044031,Zm00001d044033,Zm00001d044037	B73	Maize1	Shared	PH207_Cluster_0548	0.381905248187,0.959995416735
B73_Cluster_1433	Zm00001d044040,Zm00001d044043,Zm00001d044045,Zm00001d044048,Zm00001d044049,Zm00001d044050	B73	Maize1	Shared	PH207_Cluster_0549	7.71731685122,0.370105935353,7.71731685122,10.5051242747,10.5051242747
B73_Cluster_1434	Zm00001d044052,Zm00001d044053	B73	Maize1	Private	NA	2.98971
B73_Cluster_1435	Zm00001d044095,Zm00001d044096,Zm00001d044099	B73	Maize1	Shared	PH207_Cluster_0551	11.7450022574,1.19927341546
B73_Cluster_1436	Zm00001d044117,Zm00001d044118	B73	Maize1	Shared	PH207_Cluster_0552	11.7991
B73_Cluster_1437	Zm00001d044146,Zm00001d044147,Zm00001d044153,Zm00001d044154,Zm00001d044156,Zm00001d044157,Zm00001d044159	B73	Maize1	Shared	PH207_Cluster_0553	2.57156788422,11.7380004284,11.7380004284,11.7380004284,11.7380004284,5.03954763372
B73_Cluster_1438	Zm00001d044203,Zm00001d044208	B73	Maize1	Private	NA	11.7298
B73_Cluster_1439	Zm00001d044231,Zm00001d044237	B73	Maize1	Private	NA	11.7115
B73_Cluster_1440	Zm00001d044246,Zm00001d044247	B73	Nonsyntenic	Private	NA	11.8335
B73_Cluster_1441	Zm00001d044281,Zm00001d044283	B73	Maize1	Shared	PH207_Cluster_0556	11.7205
B73_Cluster_1442	Zm00001d044288,Zm00001d044289	B73	Maize1	Shared	PH207_Cluster_0557	11.7183
B73_Cluster_1443	Zm00001d044339,Zm00001d044340	B73	Maize1	Shared	PH207_Cluster_0560	2.11189
B73_Cluster_1444	Zm00001d044345,Zm00001d044348,Zm00001d044351,Zm00001d044352,Zm00001d044354	B73	Nonsyntenic	Shared	PH207_Cluster_0562	0.411561315225,0.454842058569,11.7384942799,4.03400101353
B73_Cluster_1445	Zm00001d044375,Zm00001d044376,Zm00001d044378	B73	Maize1	Private	NA	4.89608447678,11.7380525066
B73_Cluster_1446	Zm00001d044385,Zm00001d044386	B73	Maize1	Shared	PH207_Cluster_0563	11.7226
B73_Cluster_1447	Zm00001d044396,Zm00001d044399,Zm00001d044401,Zm00001d044402	B73	Maize1	Shared	PH207_Cluster_0565	2.70918043276,2.70918043276,0.124514593505
B73_Cluster_1448	Zm00001d044398,Zm00001d044400	B73	Nonsyntenic	NA	NA	NA
B73_Cluster_1449	Zm00001d044432,Zm00001d044433	B73	Maize1	Shared	PH207_Cluster_0566	4.09135
B73_Cluster_1450	Zm00001d044438,Zm00001d044439,Zm00001d044440	B73	Maize1	Private	NA	11.8107886908,0.389088863983
B73_Cluster_1451	Zm00001d044442,Zm00001d044443	B73	Maize1	Shared	PH207_Cluster_0567	11.7092
B73_Cluster_1452	Zm00001d044457,Zm00001d044458	B73	Maize1	Shared	PH207_Cluster_0568	0.0215497
B73_Cluster_1453	Zm00001d044570,Zm00001d044573	B73	Maize1	Shared	PH207_Cluster_0569	11.7259
B73_Cluster_1454	Zm00001d044579,Zm00001d044580	B73	Maize1	Private	NA	0.842848
B73_Cluster_1455	Zm00001d044586,Zm00001d044587,Zm00001d044588,Zm00001d044589,Zm00001d044590	B73	Maize1	Private	NA	11.7441032508,11.7441032508,11.7441032508,0.926285776958
B73_Cluster_1456	Zm00001d044623,Zm00001d044626,Zm00001d044627	B73	Maize2	Private	NA	11.7932846197,11.7932846197
B73_Cluster_1457	Zm00001d044624,Zm00001d044628	B73	Maize2	Private	NA	1.97649
B73_Cluster_1458	Zm00001d044654,Zm00001d044655	B73	Maize2	Shared	PH207_Cluster_0571	7.86324
B73_Cluster_1459	Zm00001d044670,Zm00001d044671	B73	Maize2	Shared	PH207_Cluster_0572	11.5033
B73_Cluster_1460	Zm00001d044685,Zm00001d044686	B73	Maize2	Private	NA	4.09455
B73_Cluster_1461	Zm00001d044730,Zm00001d044732	B73	Maize1	Private	NA	3.71842
B73_Cluster_1462	Zm00001d044762,Zm00001d044763,Zm00001d044765	B73	Maize1	Shared	PH207_Cluster_1208	1.00428423291,11.7257656867
B73_Cluster_1463	Zm00001d044775,Zm00001d044776,Zm00001d044777	B73	Maize1	Shared	PH207_Cluster_1209	11.7452162913,5.33195639216
B73_Cluster_1464	Zm00001d044790,Zm00001d044795	B73	Nonsyntenic	NA	NA	NA
B73_Cluster_1465	Zm00001d044884,Zm00001d044889	B73	Nonsyntenic	NA	NA	NA
B73_Cluster_1466	Zm00001d044896,Zm00001d044897	B73	Nonsyntenic	NA	NA	NA
B73_Cluster_1467	Zm00001d044906,Zm00001d044908	B73	Maize1	Shared	PH207_Cluster_1211	3.92109
B73_Cluster_1468	Zm00001d044907,Zm00001d044916	B73	Maize1	Private	NA	11.8136
B73_Cluster_1469	Zm00001d044933,Zm00001d044934,Zm00001d044936,Zm00001d044937	B73	Maize1	Private	NA	11.7230171029,5.45148064204,4.42877344187
B73_Cluster_1470	Zm00001d044966,Zm00001d044967	B73	Maize1	Shared	PH207_Cluster_1212	11.7048
B73_Cluster_1471	Zm00001d044996,Zm00001d044999	B73	Nonsyntenic	Shared	PH207_Cluster_1213	11.7284
B73_Cluster_1472	Zm00001d045006,Zm00001d045008,Zm00001d045009	B73	Nonsyntenic	NA	NA	NA
B73_Cluster_1473	Zm00001d045030,Zm00001d045031	B73	Maize1	Private	NA	11.8288
B73_Cluster_1474	Zm00001d045070,Zm00001d045071	B73	Maize1	Shared	PH207_Cluster_1215	11.7259
B73_Cluster_1475	Zm00001d045086,Zm00001d045088	B73	Maize1	Private	NA	11.7128
B73_Cluster_1476	Zm00001d045089,Zm00001d045090	B73	Maize1	Private	NA	11.8328
B73_Cluster_1477	Zm00001d045091,Zm00001d045092	B73	Maize1	Shared	PH207_Cluster_1216	11.7282
B73_Cluster_1478	Zm00001d045141,Zm00001d045145	B73	Maize1	Private	NA	11.8324
B73_Cluster_1479	Zm00001d045157,Zm00001d045158	B73	Maize1	Shared	PH207_Cluster_1218	11.7164
B73_Cluster_1480	Zm00001d045159,Zm00001d045169	B73	Nonsyntenic	Private	PH207_Cluster_1219	10.3622
B73_Cluster_1481	Zm00001d045221,Zm00001d045226,Zm00001d045228	B73	Nonsyntenic	Shared	PH207_Cluster_1223	11.7267038698,1.43872844989
B73_Cluster_1482	Zm00001d045235,Zm00001d045244,Zm00001d045247	B73	Maize1	Shared	PH207_Cluster_1224	1.09758235396,7.39671972593
B73_Cluster_1483	Zm00001d045238,Zm00001d045240	B73	Nonsyntenic	Shared	PH207_Cluster_1225	11.7223
B73_Cluster_1484	Zm00001d045256,Zm00001d045257,Zm00001d045258,Zm00001d045260	B73	Nonsyntenic	Private	NA	3.55770836167,11.7179992103,11.7179992103
B73_Cluster_1485	Zm00001d045271,Zm00001d045276	B73	Maize1	Shared	PH207_Cluster_1228	11.731
B73_Cluster_1486	Zm00001d045272,Zm00001d045274,Zm00001d045277	B73	Nonsyntenic	Private	NA	0.00204905890544,0.00204905890544
B73_Cluster_1487	Zm00001d045298,Zm00001d045302	B73	Maize1	Shared	PH207_Cluster_1229	4.93594
B73_Cluster_1488	Zm00001d045299,Zm00001d045300	B73	Maize1	Private	NA	11.7138
B73_Cluster_1489	Zm00001d045327,Zm00001d045340,Zm00001d045341,Zm00001d045344,Zm00001d045347,Zm00001d045350	B73	Maize1	Shared	PH207_Cluster_1230	0.878647170414,6.98491786767,0.594548962742,6.98491786767,5.59072857118
B73_Cluster_1490	Zm00001d045342,Zm00001d045348	B73	Nonsyntenic	Shared	PH207_Cluster_1231	0.00131325
B73_Cluster_1491	Zm00001d045360,Zm00001d045361,Zm00001d045369,Zm00001d045370	B73	Maize1	Private	NA	11.727678328,11.727678328,5.49902541221
B73_Cluster_1492	Zm00001d045390,Zm00001d045391,Zm00001d045392	B73	Maize1	Shared	PH207_Cluster_1232	9.98080222434,2.82970619915
B73_Cluster_1493	Zm00001d045398,Zm00001d045400	B73	Maize1	Shared	PH207_Cluster_1233	1.8943
B73_Cluster_1494	Zm00001d045404,Zm00001d045405	B73	Maize1	Private	NA	4.82507
B73_Cluster_1495	Zm00001d045406,Zm00001d045408,Zm00001d045410,Zm00001d045412,Zm00001d045414	B73	Maize1	Shared	PH207_Cluster_1235	1.48150670254,2.00150702854,0.69319014818,5.81055286584
B73_Cluster_1496	Zm00001d045454,Zm00001d045456	B73	Nonsyntenic	Shared	PH207_Cluster_1236	11.7179
B73_Cluster_1497	Zm00001d045459,Zm00001d045460,Zm00001d045461	B73	Maize1	Private	PH207_Cluster_1237	11.8523226512,0.00209135424502
B73_Cluster_1498	Zm00001d045465,Zm00001d045466	B73	Maize1	Private	NA	1.63703
B73_Cluster_1499	Zm00001d045473,Zm00001d045474	B73	Nonsyntenic	NA	NA	NA
B73_Cluster_1500	Zm00001d045564,Zm00001d045565	B73	Maize1	Private	NA	0.0072996
B73_Cluster_1501	Zm00001d045576,Zm00001d045582	B73	Maize1	Shared	PH207_Cluster_1240	1.82472
B73_Cluster_1502	Zm00001d045577,Zm00001d045578	B73	Maize1	Private	NA	6.37826
B73_Cluster_1503	Zm00001d045656,Zm00001d045672	B73	Nonsyntenic	NA	NA	NA
B73_Cluster_1504	Zm00001d045668,Zm00001d045669	B73	Maize1	Shared	PH207_Cluster_1242	11.7361
B73_Cluster_1505	Zm00001d045683,Zm00001d045684	B73	Nonsyntenic	NA	NA	NA
B73_Cluster_1506	Zm00001d045708,Zm00001d045709,Zm00001d045711,Zm00001d045712,Zm00001d045713	B73	Maize1	Shared	PH207_Cluster_1243	1.25203002439,4.26185179492,4.26185179492,2.73996721204
B73_Cluster_1507	Zm00001d045720,Zm00001d045721,Zm00001d045722	B73	Maize1	Shared	PH207_Cluster_1244	11.7127185234,11.7127185234
B73_Cluster_1508	Zm00001d045774,Zm00001d045778	B73	Maize1	Shared	PH207_Cluster_1245	11.709
B73_Cluster_1509	Zm00001d045831,Zm00001d045836,Zm00001d045842,Zm00001d045843,Zm00001d045849,Zm00001d045852,Zm00001d045855,Zm00001d045863	B73	Maize1	Shared	PH207_Cluster_1247	5.37689664785,5.37689664785,10.5533173552,10.5533173552,11.7152661057,11.7152661057,9.89053629673
B73_Cluster_1510	Zm00001d045838,Zm00001d045839	B73	Maize1	Private	NA	9.98575
B73_Cluster_1511	Zm00001d045845,Zm00001d045846	B73	Maize1	Shared	PH207_Cluster_1248	1.98664
B73_Cluster_1512	Zm00001d045875,Zm00001d045877	B73	Maize1	Shared	PH207_Cluster_1249	11.7141
B73_Cluster_1513	Zm00001d045890,Zm00001d045891,Zm00001d045892	B73	Nonsyntenic	Private	NA	11.8155144658,11.8155144658
B73_Cluster_1514	Zm00001d046004,Zm00001d046005	B73	Maize1	Shared	PH207_Cluster_1250	11.7284
B73_Cluster_1515	Zm00001d046053,Zm00001d046054	B73	Nonsyntenic	Private	NA	0.0585042
B73_Cluster_1516	Zm00001d046091,Zm00001d046093	B73	Maize1	Shared	PH207_Cluster_1257	4.73886
B73_Cluster_1517	Zm00001d046143,Zm00001d046145,Zm00001d046147,Zm00001d046148,Zm00001d046151,Zm00001d046152,Zm00001d046154,Zm00001d046156	B73	Maize1	Shared	PH207_Cluster_1254	3.29157183742,5.0068005761,6.76668704633,11.7298958245,11.7298958245,1.11879868635,5.31705027339
B73_Cluster_1518	Zm00001d046153,Zm00001d046166	B73	Maize1	Private	NA	11.7271
B73_Cluster_1519	Zm00001d046158,Zm00001d046161	B73	Maize1	Private	NA	11.8152
B73_Cluster_1520	Zm00001d046184,Zm00001d046186,Zm00001d046187	B73	Maize1	Shared	PH207_Cluster_1253	7.91657086563,11.7304208475
B73_Cluster_1521	Zm00001d046242,Zm00001d046243	B73	Maize1	Shared	PH207_Cluster_1252	11.7318
B73_Cluster_1522	Zm00001d046314,Zm00001d046315,Zm00001d046316	B73	Maize1	Private	NA	0.00674238931282,0.0085848691089
B73_Cluster_1523	Zm00001d046318,Zm00001d046319,Zm00001d046322	B73	Maize1	Shared	PH207_Cluster_1261	6.09595304471,4.96097100057
B73_Cluster_1524	Zm00001d046342,Zm00001d046344	B73	Maize1	Shared	PH207_Cluster_1263	3.31365
B73_Cluster_1525	Zm00001d046460,Zm00001d046466,Zm00001d046473	B73	Nonsyntenic	Private	PH207_Cluster_1264	3.84748493351,7.7327851556
B73_Cluster_1526	Zm00001d046490,Zm00001d046491	B73	Maize1	Shared	PH207_Cluster_1265	3.55071
B73_Cluster_1527	Zm00001d046492,Zm00001d046493	B73	Maize1	Shared	PH207_Cluster_1266	11.7336
B73_Cluster_1528	Zm00001d046517,Zm00001d046518,Zm00001d046519	B73	Maize1	Shared	PH207_Cluster_1267	1.88905250537,8.08591630188
B73_Cluster_1529	Zm00001d046526,Zm00001d046527	B73	Nonsyntenic	Shared	PH207_Cluster_1268	11.9001
B73_Cluster_1530	Zm00001d046604,Zm00001d046610	B73	Maize1	Shared	PH207_Cluster_1270	11.78
B73_Cluster_1531	Zm00001d046649,Zm00001d046651	B73	Maize1	Private	NA	11.7193
B73_Cluster_1532	Zm00001d046667,Zm00001d046668	B73	Maize1	Shared	PH207_Cluster_1271	6.14301
B73_Cluster_1533	Zm00001d046673,Zm00001d046675	B73	Maize1	Shared	PH207_Cluster_1272	5.18914
B73_Cluster_1534	Zm00001d046697,Zm00001d046700,Zm00001d046705,Zm00001d046706,Zm00001d046711,Zm00001d046713,Zm00001d046714	B73	Nonsyntenic	Private	PH207_Cluster_1273	0.00332136215355,0.00169966091614,0.00169966091614,11.8899072354,11.8899072354,0.00332136215355
B73_Cluster_1535	Zm00001d046743,Zm00001d046745,Zm00001d046746	B73	Maize1	Shared	PH207_Cluster_1274	11.7549845651,5.97673216756
B73_Cluster_1536	Zm00001d046765,Zm00001d046766	B73	Maize1	Shared	PH207_Cluster_1275	11.7265
B73_Cluster_1537	Zm00001d046800,Zm00001d046801	B73	Maize1	Shared	PH207_Cluster_1276	2.15883
B73_Cluster_1538	Zm00001d046812,Zm00001d046813	B73	Maize1	Private	NA	0.00693572
B73_Cluster_1539	Zm00001d046828,Zm00001d046831	B73	Maize1	Shared	PH207_Cluster_1277	9.38922
B73_Cluster_1540	Zm00001d046839,Zm00001d046842	B73	Nonsyntenic	NA	NA	NA
B73_Cluster_1541	Zm00001d046840,Zm00001d046841	B73	Nonsyntenic	NA	NA	NA
B73_Cluster_1542	Zm00001d046846,Zm00001d046859	B73	Maize1	Shared	PH207_Cluster_1278	0.0634572
B73_Cluster_1543	Zm00001d046875,Zm00001d046881	B73	Nonsyntenic	Private	NA	11.8058
B73_Cluster_1544	Zm00001d046921,Zm00001d046922	B73	Maize1	Private	NA	11.8253
B73_Cluster_1545	Zm00001d046925,Zm00001d046926	B73	Maize1	Private	PH207_Cluster_1279	11.8233
B73_Cluster_1546	Zm00001d046986,Zm00001d046993	B73	Maize1	Private	NA	0.236844
B73_Cluster_1547	Zm00001d047028,Zm00001d047030	B73	Maize2	Shared	PH207_Cluster_1280	11.7103
B73_Cluster_1548	Zm00001d047064,Zm00001d047066	B73	Maize2	Shared	PH207_Cluster_1281	5.84504
B73_Cluster_1549	Zm00001d047087,Zm00001d047089,Zm00001d047090,Zm00001d047091,Zm00001d047093,Zm00001d047094,Zm00001d047096	B73	Maize2	Shared	PH207_Cluster_1282	11.7340430585,6.10271778891,6.10271778891,6.10271778891,1.0436810266,11.7340430585
B73_Cluster_1550	Zm00001d047097,Zm00001d047099	B73	Maize2	Shared	PH207_Cluster_1283	11.7208
B73_Cluster_1551	Zm00001d047111,Zm00001d047113,Zm00001d047114,Zm00001d047115,Zm00001d047116,Zm00001d047117	B73	Maize2	Private	NA	11.7278284583,1.45315718274,1.74814135863,1.74814135863,1.45315718274
B73_Cluster_1552	Zm00001d047135,Zm00001d047142,Zm00001d047146,Zm00001d047147	B73	Maize2	Shared	PH207_Cluster_1285	0.561719944757,0.462688601017,0.0712987273454
B73_Cluster_1553	Zm00001d047192,Zm00001d047194	B73	Maize2	Shared	PH207_Cluster_1287	0.713415
B73_Cluster_1554	Zm00001d047210,Zm00001d047211,Zm00001d047212	B73	Maize2	Shared	PH207_Cluster_1288	6.90615993474,10.8157016077
B73_Cluster_1555	Zm00001d047218,Zm00001d047219	B73	Maize2	Private	NA	5.52304
B73_Cluster_1556	Zm00001d047223,Zm00001d047235	B73	Maize2	Shared	PH207_Cluster_1289	9.42532
B73_Cluster_1557	Zm00001d047231,Zm00001d047232	B73	Maize2	Shared	PH207_Cluster_1290	11.7123
B73_Cluster_1558	Zm00001d047330,Zm00001d047333,Zm00001d047334	B73	Maize2	Shared	PH207_Cluster_1291	8.59278987741,2.69843911813
B73_Cluster_1559	Zm00001d047392,Zm00001d047395	B73	Maize2	Shared	PH207_Cluster_1292	5.45404
B73_Cluster_1560	Zm00001d047404,Zm00001d047407	B73	Maize2	Private	NA	0.821589
B73_Cluster_1561	Zm00001d047405,Zm00001d047406,Zm00001d047408	B73	Nonsyntenic	NA	NA	NA
B73_Cluster_1562	Zm00001d047410,Zm00001d047411	B73	Nonsyntenic	NA	NA	NA
B73_Cluster_1563	Zm00001d047417,Zm00001d047418	B73	Maize2	Private	NA	11.7106
B73_Cluster_1564	Zm00001d047424,Zm00001d047425	B73	Maize2	Shared	PH207_Cluster_1293	0.00241739
B73_Cluster_1565	Zm00001d047542,Zm00001d047548,Zm00001d047553	B73	Nonsyntenic	Shared	PH207_Cluster_1295	11.7313467612,1.54171756724
B73_Cluster_1566	Zm00001d047543,Zm00001d047549	B73	Nonsyntenic	Private	NA	11.7273
B73_Cluster_1567	Zm00001d047621,Zm00001d047625	B73	Maize2	Private	NA	11.815
B73_Cluster_1568	Zm00001d047639,Zm00001d047651,Zm00001d047656,Zm00001d047658	B73	Maize2	Private	PH207_Cluster_1296	1.57165645272,0.46103523773,0.46103523773
B73_Cluster_1569	Zm00001d047647,Zm00001d047648,Zm00001d047654,Zm00001d047657	B73	Maize2	Private	NA	11.7264457902,2.88958185729,0.893734959865
B73_Cluster_1570	Zm00001d047737,Zm00001d047738	B73	Maize2	Private	NA	5.62531
B73_Cluster_1571	Zm00001d047781,Zm00001d047782,Zm00001d047783,Zm00001d047784,Zm00001d047785	B73	Maize2	Private	NA	0.122198811987,0.00687727026548,1.34388441369,1.34388441369
B73_Cluster_1572	Zm00001d047809,Zm00001d047810,Zm00001d047811	B73	Nonsyntenic	NA	NA	NA
B73_Cluster_1573	Zm00001d047884,Zm00001d047885,Zm00001d047886,Zm00001d047887	B73	Maize2	Shared	PH207_Cluster_1301	5.50561996409,0.032742109155,3.41408506158
B73_Cluster_1574	Zm00001d047890,Zm00001d047892	B73	Maize2	Private	NA	11.8164
B73_Cluster_1575	Zm00001d047916,Zm00001d047917	B73	Maize2	Private	NA	10.8937
B73_Cluster_1576	Zm00001d047933,Zm00001d047934	B73	Maize2	Shared	PH207_Cluster_1302	2.61302
B73_Cluster_1577	Zm00001d047938,Zm00001d047939	B73	Maize2	Shared	PH207_Cluster_1303	11.7454
B73_Cluster_1578	Zm00001d048009,Zm00001d048010	B73	Maize2	Private	NA	1.69572
B73_Cluster_1579	Zm00001d048053,Zm00001d048054	B73	Maize2	Shared	PH207_Cluster_1307	3.94693
B73_Cluster_1580	Zm00001d048063,Zm00001d048064	B73	Nonsyntenic	Private	NA	11.8144
B73_Cluster_1581	Zm00001d048135,Zm00001d048136	B73	Maize2	Private	NA	2.56154
B73_Cluster_1582	Zm00001d048151,Zm00001d048152	B73	Maize2	Shared	PH207_Cluster_1309	0.863772
B73_Cluster_1583	Zm00001d048157,Zm00001d048158,Zm00001d048159	B73	Maize2	Shared	PH207_Cluster_1310	4.4241868172,7.86992848593
B73_Cluster_1584	Zm00001d048166,Zm00001d048169	B73	Maize2	Private	NA	5.81237
B73_Cluster_1585	Zm00001d048187,Zm00001d048189	B73	Maize2	Private	NA	11.7243
B73_Cluster_1586	Zm00001d048191,Zm00001d048192	B73	Maize2	Shared	PH207_Cluster_1312	11.7125
B73_Cluster_1587	Zm00001d048205,Zm00001d048207	B73	Maize2	Shared	PH207_Cluster_1313	0.166326
B73_Cluster_1588	Zm00001d048222,Zm00001d048223	B73	Maize2	Private	NA	3.11905
B73_Cluster_1589	Zm00001d048252,Zm00001d048255	B73	Maize2	Shared	PH207_Cluster_1315	5.31821
B73_Cluster_1590	Zm00001d048253,Zm00001d048256	B73	Maize2	Shared	PH207_Cluster_1316	1.34751
B73_Cluster_1591	Zm00001d048263,Zm00001d048268	B73	Maize2	Private	NA	9.74206
B73_Cluster_1592	Zm00001d048279,Zm00001d048280	B73	Nonsyntenic	Shared	PH207_Cluster_1317	0.801472
B73_Cluster_1593	Zm00001d048288,Zm00001d048289	B73	Maize2	Private	NA	0.883747
B73_Cluster_1594	Zm00001d048296,Zm00001d048297	B73	Maize2	Shared	PH207_Cluster_1318	8.4009
B73_Cluster_1595	Zm00001d048303,Zm00001d048306	B73	Maize2	Private	NA	11.7185
B73_Cluster_1596	Zm00001d048341,Zm00001d048342	B73	Maize2	Private	NA	5.20961
B73_Cluster_1597	Zm00001d048353,Zm00001d048354	B73	Maize2	Private	NA	2.29399
B73_Cluster_1598	Zm00001d048387,Zm00001d048389	B73	Maize2	Private	NA	4.13232
B73_Cluster_1599	Zm00001d048416,Zm00001d048417	B73	Maize2	Private	NA	11.7316
B73_Cluster_1600	Zm00001d048484,Zm00001d048492	B73	Maize2	Private	NA	0.00246169
B73_Cluster_1601	Zm00001d048521,Zm00001d048522	B73	Maize2	Private	NA	0.00220563
B73_Cluster_1602	Zm00001d048558,Zm00001d048559,Zm00001d048560	B73	Maize2	Shared	PH207_Cluster_1320	10.7999732254,1.3753552439
B73_Cluster_1603	Zm00001d048588,Zm00001d048600,Zm00001d048601,Zm00001d048602,Zm00001d048603,Zm00001d048604	B73	Maize1	Private	NA	11.7359021741,11.7359021741,0.443131623907,1.77513391691,1.77513391691
B73_Cluster_1604	Zm00001d048592,Zm00001d048593	B73	Maize1	Shared	PH207_Cluster_0575	4.79689
B73_Cluster_1605	Zm00001d048639,Zm00001d048640	B73	Maize1	Private	NA	11.737
B73_Cluster_1606	Zm00001d048656,Zm00001d048660	B73	Nonsyntenic	Shared	PH207_Cluster_0579	0.00294417
B73_Cluster_1607	Zm00001d048663,Zm00001d048665	B73	Nonsyntenic	Private	NA	11.7192
B73_Cluster_1608	Zm00001d048681,Zm00001d048682	B73	Maize1	Private	NA	1.42721
B73_Cluster_1609	Zm00001d048702,Zm00001d048703,Zm00001d048705,Zm00001d048710	B73	Nonsyntenic	Shared	PH207_Cluster_0582	11.887444031,11.887444031,0.00264698056276
B73_Cluster_1610	Zm00001d048707,Zm00001d048711	B73	Nonsyntenic	Shared	PH207_Cluster_0583	11.726
B73_Cluster_1611	Zm00001d048719,Zm00001d048720	B73	Maize1	Private	NA	11.7421
B73_Cluster_1612	Zm00001d048723,Zm00001d048726	B73	Maize1	Shared	PH207_Cluster_0584	0.504293
B73_Cluster_1613	Zm00001d048727,Zm00001d048728,Zm00001d048729	B73	Maize1	Private	NA	5.45897885279,11.7256080483
B73_Cluster_1614	Zm00001d048746,Zm00001d048748,Zm00001d048752,Zm00001d048754,Zm00001d048757	B73	Maize1	Shared	PH207_Cluster_0585	0.659768673864,1.63685417953,0.0825345590515,1.01034182678
B73_Cluster_1615	Zm00001d048753,Zm00001d048755	B73	Nonsyntenic	NA	NA	NA
B73_Cluster_1616	Zm00001d048760,Zm00001d048761	B73	Maize1	Shared	PH207_Cluster_0586	11.725
B73_Cluster_1617	Zm00001d048771,Zm00001d048774,Zm00001d048775,Zm00001d048776	B73	Maize1	Shared	PH207_Cluster_0587	4.28214144191,4.28214144191,11.7315670881
B73_Cluster_1618	Zm00001d048806,Zm00001d048807,Zm00001d048808,Zm00001d048809,Zm00001d048810,Zm00001d048812,Zm00001d048813,Zm00001d048816,Zm00001d048817,Zm00001d048818	B73	Maize1	Shared	PH207_Cluster_0588	3.10334888632,1.10605636434,2.36498309128,2.36498309128,3.10334888632,2.08795749047,3.10334888632,3.10334888632,1.51131490412
B73_Cluster_1619	Zm00001d048847,Zm00001d048848,Zm00001d048849,Zm00001d048850,Zm00001d048851,Zm00001d048852	B73	Maize1	Private	NA	10.5447458304,3.00711284841,4.09968822019,1.6879511295,4.09968822019
B73_Cluster_1620	Zm00001d048864,Zm00001d048865,Zm00001d048866,Zm00001d048875	B73	Nonsyntenic	Private	PH207_Cluster_0589	0.00271806067275,11.9091533745,11.9091533745
B73_Cluster_1621	Zm00001d048867,Zm00001d048874	B73	Nonsyntenic	Shared	PH207_Cluster_0590	11.7203
B73_Cluster_1622	Zm00001d048870,Zm00001d048871,Zm00001d048872	B73	Maize1	Shared	PH207_Cluster_0591	11.7365953676,1.46552601779
B73_Cluster_1623	Zm00001d048883,Zm00001d048884,Zm00001d048886	B73	Nonsyntenic	NA	NA	NA
B73_Cluster_1624	Zm00001d048947,Zm00001d048948,Zm00001d048949,Zm00001d048950	B73	Maize1	Shared	PH207_Cluster_0592	11.7292601707,6.01421657732,0.44972620413
B73_Cluster_1625	Zm00001d048962,Zm00001d048968	B73	Maize1	Shared	PH207_Cluster_0593	5.29421
B73_Cluster_1626	Zm00001d048972,Zm00001d048975,Zm00001d048978	B73	Maize1	Shared	PH207_Cluster_0594	6.27728949879,11.7202079224
B73_Cluster_1627	Zm00001d048985,Zm00001d048987	B73	Maize1	Shared	PH207_Cluster_0596	11.7998
B73_Cluster_1628	Zm00001d048989,Zm00001d048990	B73	Maize1	Private	NA	11.7312
B73_Cluster_1629	Zm00001d049031,Zm00001d049032	B73	Nonsyntenic	Shared	PH207_Cluster_0598	11.7124
B73_Cluster_1630	Zm00001d049060,Zm00001d049061	B73	Maize1	Private	NA	11.8075
B73_Cluster_1631	Zm00001d049110,Zm00001d049111	B73	Nonsyntenic	Shared	PH207_Cluster_0600	11.7311
B73_Cluster_1632	Zm00001d049116,Zm00001d049117,Zm00001d049118	B73	Nonsyntenic	NA	NA	NA
B73_Cluster_1633	Zm00001d049133,Zm00001d049134	B73	Maize1	Shared	PH207_Cluster_0601	11.7292
B73_Cluster_1634	Zm00001d049175,Zm00001d049176	B73	Maize1	Private	NA	11.7429
B73_Cluster_1635	Zm00001d049178,Zm00001d049179,Zm00001d049181	B73	Maize1	Private	NA	5.68819885536,11.7470167828
B73_Cluster_1636	Zm00001d049217,Zm00001d049219	B73	Maize1	Shared	PH207_Cluster_0603	11.7416
B73_Cluster_1637	Zm00001d049220,Zm00001d049221	B73	Maize1	Private	NA	0.00386506
B73_Cluster_1638	Zm00001d049259,Zm00001d049260	B73	Maize1	Shared	PH207_Cluster_0604	11.7066
B73_Cluster_1639	Zm00001d049282,Zm00001d049292	B73	Nonsyntenic	Shared	PH207_Cluster_0606	11.7328
B73_Cluster_1640	Zm00001d049286,Zm00001d049293	B73	Maize1	Shared	PH207_Cluster_0607	1.8037
B73_Cluster_1641	Zm00001d049290,Zm00001d049291	B73	Maize1	Shared	PH207_Cluster_0608	11.7352
B73_Cluster_1642	Zm00001d049299,Zm00001d049301	B73	Maize1	Shared	PH207_Cluster_0609	11.7263
B73_Cluster_1643	Zm00001d049418,Zm00001d049419,Zm00001d049420,Zm00001d049421,Zm00001d049423,Zm00001d049424,Zm00001d049425,Zm00001d049426,Zm00001d049427,Zm00001d049428,Zm00001d049430,Zm00001d049431,Zm00001d049432,Zm00001d049433,Zm00001d049434,Zm00001d049435,Zm00001d049436,Zm00001d049437,Zm00001d049438,Zm00001d049439	B73	Maize2	Shared	PH207_Cluster_0610	0.34829635193,5.55717496048,1.54617024789,1.68767193094,5.55717496048,5.55717496048,11.7361955285,11.7361955285,1.02014369185,5.55717496048,0.0302740733498,0.0106209479112,0.0447376585737,11.7361955285,11.7361955285,11.7361955285,11.7361955285,11.7361955285,0.20982822647
B73_Cluster_1644	Zm00001d049508,Zm00001d049509	B73	Nonsyntenic	NA	NA	NA
B73_Cluster_1645	Zm00001d049528,Zm00001d049532	B73	Maize2	Shared	PH207_Cluster_0612	5.66608
B73_Cluster_1646	Zm00001d049536,Zm00001d049539	B73	Maize2	Shared	PH207_Cluster_0613	11.7129
B73_Cluster_1647	Zm00001d049559,Zm00001d049560	B73	Maize2	Private	NA	11.7341
B73_Cluster_1648	Zm00001d049666,Zm00001d049668	B73	Maize2	Shared	PH207_Cluster_0616	0.278679
B73_Cluster_1649	Zm00001d049774,Zm00001d049777,Zm00001d049781	B73	Maize2	Shared	PH207_Cluster_0619	5.85264861003,11.7363048655
B73_Cluster_1650	Zm00001d049792,Zm00001d049793	B73	Nonsyntenic	NA	NA	NA
B73_Cluster_1651	Zm00001d049822,Zm00001d049824	B73	Maize2	Shared	PH207_Cluster_0621	11.7431
B73_Cluster_1652	Zm00001d049838,Zm00001d049840,Zm00001d049841,Zm00001d049842,Zm00001d049843,Zm00001d049844	B73	Nonsyntenic	Shared	PH207_Cluster_0622	11.7198728275,10.1715030722,6.70025096806,3.88492135369,11.7198728275
B73_Cluster_1653	Zm00001d049944,Zm00001d049945	B73	Maize2	Private	NA	0.984404
B73_Cluster_1654	Zm00001d049996,Zm00001d049997	B73	Maize2	Private	NA	11.8268
B73_Cluster_1655	Zm00001d050040,Zm00001d050041	B73	Nonsyntenic	NA	NA	NA
B73_Cluster_1656	Zm00001d050074,Zm00001d050076,Zm00001d050077	B73	Maize2	Private	NA	4.92654508038,0.995934682922
B73_Cluster_1657	Zm00001d050090,Zm00001d050091	B73	Maize2	Shared	PH207_Cluster_0623	11.7204
B73_Cluster_1658	Zm00001d050099,Zm00001d050100	B73	Maize2	Private	NA	11.7914
B73_Cluster_1659	Zm00001d050140,Zm00001d050141	B73	Nonsyntenic	Shared	PH207_Cluster_0624	11.8968
B73_Cluster_1660	Zm00001d050160,Zm00001d050171	B73	Nonsyntenic	Private	PH207_Cluster_0625	11.9001
B73_Cluster_1661	Zm00001d050169,Zm00001d050170	B73	Maize2	Private	NA	8.75626
B73_Cluster_1662	Zm00001d050196,Zm00001d050198	B73	Maize2	Shared	PH207_Cluster_0626	9.54197
B73_Cluster_1663	Zm00001d050259,Zm00001d050260	B73	Maize2	Shared	PH207_Cluster_0628	11.7187
B73_Cluster_1664	Zm00001d050386,Zm00001d050388	B73	Maize2	Private	NA	1.2623
B73_Cluster_1665	Zm00001d050479,Zm00001d050493	B73	Nonsyntenic	Private	PH207_Cluster_0632	3.93185
B73_Cluster_1666	Zm00001d050608,Zm00001d050609	B73	Nonsyntenic	Private	NA	11.7284
B73_Cluster_1667	Zm00001d050682,Zm00001d050684	B73	Nonsyntenic	Private	NA	4.63861
B73_Cluster_1668	Zm00001d050920,Zm00001d050921	B73	Maize2	Shared	PH207_Cluster_0636	4.07853
B73_Cluster_1669	Zm00001d051021,Zm00001d051033	B73	Nonsyntenic	Shared	PH207_Cluster_0637	11.7317
B73_Cluster_1670	Zm00001d051083,Zm00001d051085,Zm00001d051088,Zm00001d051089,Zm00001d051093,Zm00001d051094,Zm00001d051096,Zm00001d051099	B73	Nonsyntenic	Private	PH207_Cluster_0639	11.7289222398,2.56789385507,0.827461802918,2.56789385507,2.56789385507,1.17810149,11.7289222398
B73_Cluster_1671	Zm00001d051161,Zm00001d051163,Zm00001d051166	B73	Maize2	Shared	PH207_Cluster_0641	5.63140985374,11.7387633277
B73_Cluster_1672	Zm00001d051199,Zm00001d051200,Zm00001d051202	B73	Maize2	Shared	PH207_Cluster_0643	5.20409391337,2.96837969724
B73_Cluster_1673	Zm00001d051223,Zm00001d051225	B73	Maize2	Shared	PH207_Cluster_0644	11.7361
B73_Cluster_1674	Zm00001d051251,Zm00001d051254,Zm00001d051259	B73	Nonsyntenic	NA	NA	NA
B73_Cluster_1675	Zm00001d051267,Zm00001d051269	B73	Maize2	Private	NA	11.7348
B73_Cluster_1676	Zm00001d051313,Zm00001d051314	B73	Maize2	Private	NA	11.7413
B73_Cluster_1677	Zm00001d051335,Zm00001d051336	B73	Maize2	Private	NA	11.7127
B73_Cluster_1678	Zm00001d051350,Zm00001d051355	B73	Maize2	Private	NA	11.7195
B73_Cluster_1679	Zm00001d051397,Zm00001d051399	B73	Maize2	Shared	PH207_Cluster_0647	7.91285
B73_Cluster_1680	Zm00001d051410,Zm00001d051411	B73	Maize2	Private	NA	11.7178
B73_Cluster_1681	Zm00001d051412,Zm00001d051413	B73	Nonsyntenic	Private	NA	5.49243
B73_Cluster_1682	Zm00001d051418,Zm00001d051419	B73	Maize2	Private	NA	11.735
B73_Cluster_1683	Zm00001d051460,Zm00001d051468	B73	Maize2	Shared	PH207_Cluster_0648	11.7383
B73_Cluster_1684	Zm00001d051492,Zm00001d051495	B73	Nonsyntenic	NA	NA	NA
B73_Cluster_1685	Zm00001d051607,Zm00001d051609	B73	Maize2	Private	NA	0.197767
B73_Cluster_1686	Zm00001d051660,Zm00001d051661	B73	Maize2	Private	NA	11.7401
B73_Cluster_1687	Zm00001d051668,Zm00001d051669	B73	Maize2	Private	NA	11.7378
B73_Cluster_1688	Zm00001d051692,Zm00001d051693,Zm00001d051695	B73	Maize2	Shared	PH207_Cluster_0652	7.2430630215,11.7300412041
B73_Cluster_1689	Zm00001d051706,Zm00001d051707,Zm00001d051708,Zm00001d051710,Zm00001d051711,Zm00001d051712,Zm00001d051715,Zm00001d051719,Zm00001d051720,Zm00001d051722,Zm00001d051724,Zm00001d051726,Zm00001d051727,Zm00001d051730,Zm00001d051732,Zm00001d051735	B73	Maize2	Shared	PH207_Cluster_0653	0.000624181101248,0.00242673864763,0.00491554576122,0.00491554576122,0.00205503216965,0.00205503216965,0.00491554576122,0.00109272862605,0.00491554576122,0.00228735106844,0.00234163627257,11.9016444573,11.9016444573,0.00242673864763,0.00586983604243
B73_Cluster_1690	Zm00001d051961,Zm00001d051963,Zm00001d051964,Zm00001d051965	B73	Maize2	Private	NA	11.0513432991,11.0513432991,4.85454610695
B73_Cluster_1691	Zm00001d052015,Zm00001d052016	B73	Maize2	Private	NA	11.8168
B73_Cluster_1692	Zm00001d052089,Zm00001d052090,Zm00001d052091	B73	Nonsyntenic	Shared	PH207_Cluster_0655	11.7252930103,1.44854782148
B73_Cluster_1693	Zm00001d052164,Zm00001d052165	B73	Maize2	Private	NA	2.37781
B73_Cluster_1694	Zm00001d052168,Zm00001d052170	B73	Maize2	Shared	PH207_Cluster_0657	5.65811
B73_Cluster_1695	Zm00001d052205,Zm00001d052206	B73	Maize2	Shared	PH207_Cluster_0658	11.7298
B73_Cluster_1696	Zm00001d052209,Zm00001d052210,Zm00001d052211	B73	Maize2	Shared	PH207_Cluster_0659	11.7381693283,11.7381693283
B73_Cluster_1697	Zm00001d052335,Zm00001d052336	B73	Maize1	Private	NA	11.7334
B73_Cluster_1698	Zm00001d052341,Zm00001d052342	B73	Maize1	Shared	PH207_Cluster_0660	11.7409
B73_Cluster_1699	Zm00001d052371,Zm00001d052372,Zm00001d052373,Zm00001d052374	B73	Maize1	Shared	PH207_Cluster_0662	2.90341287388,11.7282838218,11.7282838218
B73_Cluster_1700	Zm00001d052412,Zm00001d052413	B73	Nonsyntenic	Shared	PH207_Cluster_0663	11.7261
B73_Cluster_1701	Zm00001d052420,Zm00001d052421	B73	Maize1	Private	NA	2.36211
B73_Cluster_1702	Zm00001d052434,Zm00001d052435	B73	Maize1	Shared	PH207_Cluster_0665	7.32649
B73_Cluster_1703	Zm00001d052463,Zm00001d052464	B73	Maize1	Shared	PH207_Cluster_0666	11.7125
B73_Cluster_1704	Zm00001d052479,Zm00001d052480	B73	Maize1	Shared	PH207_Cluster_0667	11.706
B73_Cluster_1705	Zm00001d052501,Zm00001d052505	B73	Maize1	Shared	PH207_Cluster_0351	11.7127
B73_Cluster_1706	Zm00001d052509,Zm00001d052513	B73	Maize1	Private	NA	4.72139
B73_Cluster_1707	Zm00001d052557,Zm00001d052572,Zm00001d052580	B73	Maize1	Shared	PH207_Cluster_0669	6.18117116036,11.7302157837
B73_Cluster_1708	Zm00001d052601,Zm00001d052604	B73	Maize1	Shared	PH207_Cluster_0670	11.7104
B73_Cluster_1709	Zm00001d052625,Zm00001d052627,Zm00001d052628	B73	Maize1	Private	NA	4.31135182574,11.7217249321
B73_Cluster_1710	Zm00001d052639,Zm00001d052640	B73	Maize1	Private	NA	2.75707
B73_Cluster_1711	Zm00001d052673,Zm00001d052675,Zm00001d052676	B73	Maize1	Private	NA	9.83171932472,9.83171932472
B73_Cluster_1712	Zm00001d052683,Zm00001d052684	B73	Nonsyntenic	Private	NA	2.48262
B73_Cluster_1713	Zm00001d052776,Zm00001d052777	B73	Maize1	Private	NA	10.2763
B73_Cluster_1714	Zm00001d052792,Zm00001d052793	B73	Nonsyntenic	Private	NA	11.8006
B73_Cluster_1715	Zm00001d052818,Zm00001d052819	B73	Maize2	Private	NA	11.8126
B73_Cluster_1716	Zm00001d052827,Zm00001d052828,Zm00001d052829,Zm00001d052831	B73	Maize2	Shared	PH207_Cluster_0674	10.6410006453,10.6410006453,11.732536608
B73_Cluster_1717	Zm00001d052937,Zm00001d052939,Zm00001d052940,Zm00001d052946	B73	Maize1	Shared	PH207_Cluster_0675	8.16063750776,11.7262407837,11.7262407837
B73_Cluster_1718	Zm00001d052965,Zm00001d052966	B73	Nonsyntenic	Shared	PH207_Cluster_0676	2.49483
B73_Cluster_1719	Zm00001d052987,Zm00001d052988,Zm00001d052997	B73	Nonsyntenic	Shared	PH207_Cluster_0677	2.35514149412,11.7285418619
B73_Cluster_1720	Zm00001d052989,Zm00001d052990	B73	Nonsyntenic	Shared	PH207_Cluster_0678	11.926
B73_Cluster_1721	Zm00001d052992,Zm00001d052993	B73	Nonsyntenic	Private	NA	11.7087
B73_Cluster_1722	Zm00001d053030,Zm00001d053031	B73	Nonsyntenic	Private	NA	11.8287
B73_Cluster_1723	Zm00001d053112,Zm00001d053113,Zm00001d053114	B73	Maize1	Private	NA	7.2150899542,11.7219992173
B73_Cluster_1724	Zm00001d053193,Zm00001d053194	B73	Nonsyntenic	NA	NA	NA
B73_Cluster_1725	Zm00001d053229,Zm00001d053230	B73	Maize2	Private	NA	11.7684
B73_Cluster_1726	Zm00001d053295,Zm00001d053296	B73	Nonsyntenic	Shared	PH207_Cluster_0683	11.7417
B73_Cluster_1727	Zm00001d053328,Zm00001d053329,Zm00001d053331,Zm00001d053332	B73	Nonsyntenic	NA	NA	NA
B73_Cluster_1728	Zm00001d053363,Zm00001d053366	B73	Nonsyntenic	Shared	PH207_Cluster_0685	0.1578
B73_Cluster_1729	Zm00001d053364,Zm00001d053365	B73	Nonsyntenic	Shared	PH207_Cluster_0686	11.7814
B73_Cluster_1730	Zm00001d053384,Zm00001d053386	B73	Nonsyntenic	NA	NA	NA
B73_Cluster_1731	Zm00001d053385,Zm00001d053387	B73	Nonsyntenic	NA	NA	NA
B73_Cluster_1732	Zm00001d053401,Zm00001d053402,Zm00001d053403	B73	Maize2	Shared	PH207_Cluster_0688	11.7246402013,0.163756788033
B73_Cluster_1733	Zm00001d053433,Zm00001d053434,Zm00001d053435	B73	Maize2	Private	PH207_Cluster_0689	4.48014260169,0.907911818835
B73_Cluster_1734	Zm00001d053513,Zm00001d053514	B73	Maize2	Shared	PH207_Cluster_0690	11.741
B73_Cluster_1735	Zm00001d053526,Zm00001d053528,Zm00001d053529,Zm00001d053530,Zm00001d053531,Zm00001d053533,Zm00001d053534,Zm00001d053537,Zm00001d053538	B73	Nonsyntenic	Shared	PH207_Cluster_0691	1.59623386614,1.81057001928,3.10330635235,11.7413846571,11.7413846571,3.10330635235,3.10330635235,6.82994372553
B73_Cluster_1736	Zm00001d053578,Zm00001d053579	B73	Maize2	Private	NA	11.7126
B73_Cluster_1737	Zm00001d053587,Zm00001d053588	B73	Maize2	Shared	PH207_Cluster_0692	11.7319
B73_Cluster_1738	Zm00001d053599,Zm00001d053600	B73	Maize2	Private	NA	11.8081
B73_Cluster_1739	Zm00001d053630,Zm00001d053632,Zm00001d053633,Zm00001d053635,Zm00001d053636	B73	Nonsyntenic	Shared	PH207_Cluster_0693	0.885267211582,11.7036245537,2.1769855531,11.7036245537
B73_Cluster_1740	Zm00001d053684,Zm00001d053685	B73	Maize2	Shared	PH207_Cluster_0694	9.16003
B73_Cluster_1741	Zm00001d053770,Zm00001d053772	B73	Maize2	Private	NA	0.712218
B73_Cluster_1742	Zm00001d053784,Zm00001d053785	B73	Maize2	Private	NA	0.00178604
B73_Cluster_1743	Zm00001d053792,Zm00001d053797	B73	Maize2	Private	NA	11.7331
B73_Cluster_1744	Zm00001d053829,Zm00001d053830	B73	Maize2	Private	NA	2.69804
B73_Cluster_1745	Zm00001d053834,Zm00001d053838	B73	Maize2	Private	NA	11.7214
B73_Cluster_1746	Zm00001d053865,Zm00001d053866,Zm00001d053867	B73	Maize2	Private	NA	0.0126528942517,0.76586922835
B73_Cluster_1747	Zm00001d053912,Zm00001d053913	B73	Maize2	Private	NA	2.87171
B73_Cluster_1748	Zm00001d053916,Zm00001d053918	B73	Maize2	Private	NA	11.7206
B73_Cluster_1749	Zm00001d053933,Zm00001d053934	B73	Maize2	Shared	PH207_Cluster_0697	0.104368
B73_Cluster_1750	Zm00001d053940,Zm00001d053943	B73	Maize2	Private	NA	11.8061
B73_Cluster_1751	Zm00001d053941,Zm00001d053950,Zm00001d053960	B73	Maize2	Private	NA	0.175334926828,11.7123536387
B73_Cluster_1752	Zm00001d053942,Zm00001d053944	B73	Nonsyntenic	NA	NA	NA
B73_Cluster_1753	Zm00001d054031,Zm00001d054032	B73	Nonsyntenic	Shared	PH207_Cluster_0700	11.8097
B73_Cluster_1754	Zm00001d054041,Zm00001d054042	B73	Maize2	Shared	PH207_Cluster_0701	11.706
B73_Cluster_1755	Zm00001d054052,Zm00001d054054	B73	Maize2	Private	NA	1.08206
B73_Cluster_1756	Zm00001d054057,Zm00001d054060	B73	Maize2	Shared	PH207_Cluster_0702	0.657268
B73_Cluster_1757	Zm00001d054081,Zm00001d054085	B73	Maize2	Shared	PH207_Cluster_0704	4.06588
PH207_Cluster_0000	Zm00008a000026,Zm00008a000029	PH207	Nonsyntenic	Private	NA	3.39125
PH207_Cluster_0001	Zm00008a000036,Zm00008a000040	PH207	Maize1	Shared	B73_Cluster_0831	11.734
PH207_Cluster_0002	Zm00008a000147,Zm00008a000149	PH207	Maize1	Private	NA	0.315529
PH207_Cluster_0003	Zm00008a000228,Zm00008a000229	PH207	Maize1	Shared	B73_Cluster_0834	11.7341
PH207_Cluster_0004	Zm00008a000249,Zm00008a000252	PH207	Nonsyntenic	Private	NA	11.7237
PH207_Cluster_0005	Zm00008a000256,Zm00008a000257	PH207	Maize1	Shared	B73_Cluster_0836	11.7256
PH207_Cluster_0006	Zm00008a000262,Zm00008a000263,Zm00008a000264	PH207	Maize1	Shared	B73_Cluster_0837	1.8243233915,6.21775052105
PH207_Cluster_0007	Zm00008a000272,Zm00008a000287	PH207	Nonsyntenic	Private	NA	0.0258279
PH207_Cluster_0008	Zm00008a000279,Zm00008a000280,Zm00008a000281	PH207	Maize1	Shared	B73_Cluster_0838	8.88330381326,7.03005174357
PH207_Cluster_0009	Zm00008a000308,Zm00008a000309	PH207	Maize1	Shared	B73_Cluster_0840	11.7312
PH207_Cluster_0010	Zm00008a000311,Zm00008a000312	PH207	Maize1	Shared	B73_Cluster_0841	11.7228
PH207_Cluster_0011	Zm00008a000318,Zm00008a000319	PH207	Maize1	Shared	B73_Cluster_0842	11.7181
PH207_Cluster_0012	Zm00008a000334,Zm00008a000335,Zm00008a000336,Zm00008a000338	PH207	Maize1	Shared	B73_Cluster_0843	11.7184624831,11.7184624831,6.41399721229
PH207_Cluster_0013	Zm00008a000352,Zm00008a000353	PH207	Nonsyntenic	NA	NA	NA
PH207_Cluster_0014	Zm00008a000363,Zm00008a000364	PH207	Maize1	Shared	B73_Cluster_0844	6.81059
PH207_Cluster_0015	Zm00008a000368,Zm00008a000369	PH207	Maize1	Shared	B73_Cluster_0845	11.7316
PH207_Cluster_0016	Zm00008a000476,Zm00008a000479	PH207	Maize1	Shared	B73_Cluster_0851	2.87554
PH207_Cluster_0017	Zm00008a000498,Zm00008a000499	PH207	Maize1	Private	NA	11.8294
PH207_Cluster_0018	Zm00008a000515,Zm00008a000516,Zm00008a000517	PH207	Maize1	Shared	B73_Cluster_0854	11.7225445381,5.34669042521
PH207_Cluster_0019	Zm00008a000531,Zm00008a000532,Zm00008a000534	PH207	Maize1	Private	NA	0.892763183744,0.892763183744
PH207_Cluster_0020	Zm00008a000554,Zm00008a000556	PH207	Maize1	Shared	B73_Cluster_0856	3.81368
PH207_Cluster_0021	Zm00008a000555,Zm00008a000557	PH207	Nonsyntenic	Shared	B73_Cluster_0857	11.7214
PH207_Cluster_0022	Zm00008a000579,Zm00008a000581	PH207	Maize1	Shared	B73_Cluster_0860	4.96575
PH207_Cluster_0023	Zm00008a000590,Zm00008a000591	PH207	Maize1	Shared	B73_Cluster_0861	11.7178
PH207_Cluster_0024	Zm00008a000603,Zm00008a000604	PH207	Maize1	Shared	B73_Cluster_0863	2.5936
PH207_Cluster_0025	Zm00008a000641,Zm00008a000642,Zm00008a000643,Zm00008a000645,Zm00008a000646,Zm00008a000647,Zm00008a000648,Zm00008a000649	PH207	Nonsyntenic	Shared	B73_Cluster_0865	11.7233852322,6.79399523379,6.98921224041,6.98921224041,6.79399523379,11.7233852322,11.7233852322
PH207_Cluster_0026	Zm00008a000705,Zm00008a000707	PH207	Maize1	Shared	B73_Cluster_0866	5.6537
PH207_Cluster_0027	Zm00008a000714,Zm00008a000715	PH207	Maize1	Shared	B73_Cluster_0867	11.7355
PH207_Cluster_0028	Zm00008a000795,Zm00008a000796	PH207	Maize1	Shared	B73_Cluster_0868	11.7309
PH207_Cluster_0029	Zm00008a000845,Zm00008a000846	PH207	Maize1	Shared	B73_Cluster_0869	4.85156
PH207_Cluster_0030	Zm00008a000867,Zm00008a000868	PH207	Maize1	Private	NA	11.8021
PH207_Cluster_0031	Zm00008a000869,Zm00008a000870	PH207	Maize1	Shared	B73_Cluster_0870	11.7249
PH207_Cluster_0032	Zm00008a000872,Zm00008a000873	PH207	Maize1	Shared	B73_Cluster_0871	11.7299
PH207_Cluster_0033	Zm00008a000874,Zm00008a000875	PH207	Maize1	Shared	B73_Cluster_0872	11.7355
PH207_Cluster_0034	Zm00008a000887,Zm00008a000890	PH207	Maize1	Shared	B73_Cluster_0873	11.7495
PH207_Cluster_0035	Zm00008a000976,Zm00008a000977,Zm00008a000980	PH207	Maize1	Shared	B73_Cluster_0876	7.31358042211,11.7244140865
PH207_Cluster_0036	Zm00008a000999,Zm00008a001000	PH207	Maize1	Shared	B73_Cluster_0877	11.7626
PH207_Cluster_0037	Zm00008a001039,Zm00008a001042	PH207	Maize1	Shared	B73_Cluster_0879	11.7247
PH207_Cluster_0038	Zm00008a001046,Zm00008a001047	PH207	Maize1	Private	NA	1.46017
PH207_Cluster_0039	Zm00008a001092,Zm00008a001099	PH207	Nonsyntenic	NA	NA	NA
PH207_Cluster_0040	Zm00008a001093,Zm00008a001098	PH207	Maize1	Shared	B73_Cluster_0880	11.7388
PH207_Cluster_0041	Zm00008a001134,Zm00008a001135	PH207	Maize1	Shared	B73_Cluster_0881	11.0836
PH207_Cluster_0042	Zm00008a001144,Zm00008a001145	PH207	Maize1	Private	NA	11.8033
PH207_Cluster_0043	Zm00008a001187,Zm00008a001202	PH207	Maize1	Private	NA	11.7049
PH207_Cluster_0044	Zm00008a001249,Zm00008a001250	PH207	Maize1	Shared	B73_Cluster_0885	10.4125
PH207_Cluster_0045	Zm00008a001268,Zm00008a001269	PH207	Nonsyntenic	NA	NA	NA
PH207_Cluster_0046	Zm00008a001288,Zm00008a001290	PH207	Maize1	Shared	B73_Cluster_0888	2.12559
PH207_Cluster_0047	Zm00008a001331,Zm00008a001332	PH207	Nonsyntenic	NA	NA	NA
PH207_Cluster_0048	Zm00008a001387,Zm00008a001398	PH207	Nonsyntenic	Private	NA	11.8404
PH207_Cluster_0049	Zm00008a001393,Zm00008a001394	PH207	Maize1	Private	NA	11.7325
PH207_Cluster_0050	Zm00008a001438,Zm00008a001440	PH207	Maize1	Shared	B73_Cluster_0893	1.0147
PH207_Cluster_0051	Zm00008a001447,Zm00008a001449	PH207	Nonsyntenic	NA	NA	NA
PH207_Cluster_0052	Zm00008a001454,Zm00008a001455	PH207	Maize1	Shared	B73_Cluster_0895	0.0659201
PH207_Cluster_0053	Zm00008a001482,Zm00008a001496	PH207	Maize1	Private	NA	11.7385
PH207_Cluster_0054	Zm00008a001502,Zm00008a001503,Zm00008a001512	PH207	Maize1	Private	NA	3.29432667045,3.29432667045
PH207_Cluster_0055	Zm00008a001514,Zm00008a001515	PH207	Nonsyntenic	NA	NA	NA
PH207_Cluster_0056	Zm00008a001532,Zm00008a001533	PH207	Maize1	Shared	B73_Cluster_0900	4.33123
PH207_Cluster_0057	Zm00008a001538,Zm00008a001539	PH207	Maize1	Private	NA	11.7424
PH207_Cluster_0058	Zm00008a001574,Zm00008a001575,Zm00008a001578,Zm00008a001579	PH207	Nonsyntenic	Private	B73_Cluster_0903	7.19817265316,11.7219933081,7.25772598654
PH207_Cluster_0059	Zm00008a001590,Zm00008a001592,Zm00008a001593	PH207	Maize1	Shared	B73_Cluster_0904	0.330413506635,5.95290079059
PH207_Cluster_0060	Zm00008a001591,Zm00008a001594	PH207	Maize1	Shared	B73_Cluster_0904	1.19138
PH207_Cluster_0061	Zm00008a001607,Zm00008a001611,Zm00008a001612	PH207	Nonsyntenic	NA	NA	NA
PH207_Cluster_0062	Zm00008a001609,Zm00008a001613	PH207	Maize1	Shared	B73_Cluster_0905	1.35723
PH207_Cluster_0063	Zm00008a001636,Zm00008a001638,Zm00008a001639	PH207	Maize1	Shared	B73_Cluster_0906	2.38269676551,6.89958984153
PH207_Cluster_0064	Zm00008a001644,Zm00008a001646	PH207	Maize1	Shared	B73_Cluster_0908	0.0276967
PH207_Cluster_0065	Zm00008a001651,Zm00008a001652,Zm00008a001653	PH207	Maize1	Shared	B73_Cluster_0909	7.8411436013,10.8157016077
PH207_Cluster_0066	Zm00008a001664,Zm00008a001665	PH207	Nonsyntenic	Private	NA	5.18079
PH207_Cluster_0067	Zm00008a001702,Zm00008a001703	PH207	Maize1	Shared	B73_Cluster_0910	8.09931
PH207_Cluster_0068	Zm00008a001717,Zm00008a001718,Zm00008a001720	PH207	Maize1	Shared	B73_Cluster_0911	3.88628204738,11.7131650028
PH207_Cluster_0069	Zm00008a001757,Zm00008a001758	PH207	Maize1	Shared	B73_Cluster_0912	11.6996
PH207_Cluster_0070	Zm00008a001806,Zm00008a001807	PH207	Nonsyntenic	NA	NA	NA
PH207_Cluster_0071	Zm00008a001811,Zm00008a001812,Zm00008a001816,Zm00008a001817	PH207	Maize1	Shared	B73_Cluster_0913	0.64658338713,2.96868145532,11.7128253941
PH207_Cluster_0072	Zm00008a001819,Zm00008a001821,Zm00008a001822	PH207	Maize1	Shared	B73_Cluster_0914	11.723967861,2.69843911813
PH207_Cluster_0073	Zm00008a001848,Zm00008a001850,Zm00008a001852	PH207	Maize1	Shared	B73_Cluster_0916	11.722715899,11.722715899
PH207_Cluster_0074	Zm00008a001857,Zm00008a001860	PH207	Nonsyntenic	NA	NA	NA
PH207_Cluster_0075	Zm00008a001859,Zm00008a001861	PH207	Maize1	Private	NA	9.16221
PH207_Cluster_0076	Zm00008a001897,Zm00008a001899,Zm00008a001900,Zm00008a001901,Zm00008a001902,Zm00008a001904,Zm00008a001905,Zm00008a001906,Zm00008a001907,Zm00008a001910	PH207	Nonsyntenic	Shared	B73_Cluster_0918	0.0026672421908,0.00187212769683,0.0017804382,0.00137858194156,0.00224589087593,0.0026672421908,0.00387713701446,0.00387713701446,0.00168982701306
PH207_Cluster_0077	Zm00008a001968,Zm00008a001970,Zm00008a001972,Zm00008a001978	PH207	Maize1	Shared	B73_Cluster_0921	11.7368397648,1.92723256171,11.7368397648
PH207_Cluster_0078	Zm00008a001969,Zm00008a001971,Zm00008a001973,Zm00008a001979	PH207	Maize1	Shared	B73_Cluster_0922	11.7211350222,11.7211350222,5.58019633636
PH207_Cluster_0079	Zm00008a001987,Zm00008a001999	PH207	Maize1	Private	NA	11.7795
PH207_Cluster_0080	Zm00008a002028,Zm00008a002029	PH207	Maize1	Shared	B73_Cluster_0923	11.7278
PH207_Cluster_0081	Zm00008a002056,Zm00008a002057,Zm00008a002058,Zm00008a002059,Zm00008a002061	PH207	Nonsyntenic	Shared	B73_Cluster_0924	2.11994191926,0.888206885054,2.94827215493,2.94827215493
PH207_Cluster_0082	Zm00008a002067,Zm00008a002071	PH207	Maize1	Shared	B73_Cluster_0926	11.7212
PH207_Cluster_0083	Zm00008a002072,Zm00008a002073	PH207	Maize1	Shared	B73_Cluster_0927	6.68835
PH207_Cluster_0084	Zm00008a002078,Zm00008a002079	PH207	Nonsyntenic	NA	NA	NA
PH207_Cluster_0085	Zm00008a002121,Zm00008a002122,Zm00008a002123	PH207	Nonsyntenic	NA	NA	NA
PH207_Cluster_0086	Zm00008a002166,Zm00008a002170	PH207	Nonsyntenic	Private	NA	11.7429
PH207_Cluster_0087	Zm00008a002201,Zm00008a002203	PH207	Maize1	Shared	B73_Cluster_0930	11.7416
PH207_Cluster_0088	Zm00008a002226,Zm00008a002228	PH207	Maize1	Shared	B73_Cluster_0931	1.61712
PH207_Cluster_0089	Zm00008a002253,Zm00008a002254	PH207	Maize1	Shared	B73_Cluster_0932	11.7374
PH207_Cluster_0090	Zm00008a002271,Zm00008a002279	PH207	Nonsyntenic	NA	NA	NA
PH207_Cluster_0091	Zm00008a002291,Zm00008a002299	PH207	Maize1	Shared	B73_Cluster_0934	11.7424
PH207_Cluster_0092	Zm00008a002295,Zm00008a002296	PH207	Nonsyntenic	Shared	B73_Cluster_0935	3.01976
PH207_Cluster_0093	Zm00008a002315,Zm00008a002324	PH207	Nonsyntenic	Private	NA	11.8156
PH207_Cluster_0094	Zm00008a002316,Zm00008a002317,Zm00008a002318,Zm00008a002320,Zm00008a002321	PH207	Maize1	Shared	B73_Cluster_0936	11.7248044844,11.7248044844,2.65158743862,4.05487035546
PH207_Cluster_0095	Zm00008a002334,Zm00008a002340	PH207	Maize1	Shared	B73_Cluster_0937	11.723
PH207_Cluster_0096	Zm00008a002353,Zm00008a002361	PH207	Nonsyntenic	Private	NA	11.7278
PH207_Cluster_0097	Zm00008a002354,Zm00008a002362,Zm00008a002363	PH207	Maize1	Shared	B73_Cluster_0939	11.7392550098,11.7392550098
PH207_Cluster_0098	Zm00008a002370,Zm00008a002371	PH207	Nonsyntenic	Private	NA	11.7172
PH207_Cluster_0099	Zm00008a002382,Zm00008a002383	PH207	Maize1	Shared	B73_Cluster_0941	11.732
PH207_Cluster_0100	Zm00008a002384,Zm00008a002389	PH207	Maize1	Shared	B73_Cluster_0942	11.7344
PH207_Cluster_0101	Zm00008a002402,Zm00008a002403	PH207	Maize1	Private	NA	11.7265
PH207_Cluster_0102	Zm00008a002411,Zm00008a002412	PH207	Maize1	Shared	B73_Cluster_0943	9.12631
PH207_Cluster_0103	Zm00008a002414,Zm00008a002416	PH207	Maize1	Shared	B73_Cluster_0944	11.7318
PH207_Cluster_0104	Zm00008a002470,Zm00008a002491	PH207	Nonsyntenic	Private	NA	3.08398
PH207_Cluster_0105	Zm00008a002479,Zm00008a002490	PH207	Maize1	Private	NA	11.8161
PH207_Cluster_0106	Zm00008a002481,Zm00008a002488	PH207	Nonsyntenic	NA	NA	NA
PH207_Cluster_0107	Zm00008a002496,Zm00008a002497	PH207	Nonsyntenic	NA	NA	NA
PH207_Cluster_0108	Zm00008a002570,Zm00008a002577	PH207	Nonsyntenic	Private	NA	11.751
PH207_Cluster_0109	Zm00008a002673,Zm00008a002674	PH207	Nonsyntenic	NA	NA	NA
PH207_Cluster_0110	Zm00008a002684,Zm00008a002687	PH207	Maize1	Shared	B73_Cluster_0949	0.487607
PH207_Cluster_0111	Zm00008a002685,Zm00008a002686	PH207	Maize1	Private	NA	11.7123
PH207_Cluster_0112	Zm00008a002753,Zm00008a002761	PH207	Nonsyntenic	Private	B73_Cluster_0951	6.94433
PH207_Cluster_0113	Zm00008a002754,Zm00008a002757,Zm00008a002765	PH207	Nonsyntenic	Shared	B73_Cluster_0952	0.00280546102517,0.00280546102517
PH207_Cluster_0114	Zm00008a002774,Zm00008a002781,Zm00008a002785,Zm00008a002787	PH207	Maize1	Shared	B73_Cluster_0953	11.7420488882,11.7420488882,10.4968184051
PH207_Cluster_0115	Zm00008a002795,Zm00008a002798	PH207	Nonsyntenic	NA	NA	NA
PH207_Cluster_0116	Zm00008a002821,Zm00008a002822	PH207	Maize1	Private	NA	0.00382349
PH207_Cluster_0117	Zm00008a002834,Zm00008a002837	PH207	Maize1	Shared	B73_Cluster_0956	10.0718
PH207_Cluster_0118	Zm00008a003015,Zm00008a003017,Zm00008a003018,Zm00008a003021	PH207	Maize1	Shared	B73_Cluster_0964	11.7169540193,11.7169540193,6.48503371078
PH207_Cluster_0119	Zm00008a003045,Zm00008a003046,Zm00008a003047	PH207	Maize1	Shared	B73_Cluster_0965	11.7303697555,2.63305139694
PH207_Cluster_0120	Zm00008a003051,Zm00008a003052	PH207	Maize1	Shared	B73_Cluster_0966	11.7428
PH207_Cluster_0121	Zm00008a003067,Zm00008a003068	PH207	Maize1	Shared	B73_Cluster_0967	11.7277
PH207_Cluster_0122	Zm00008a003125,Zm00008a003127	PH207	Nonsyntenic	NA	NA	NA
PH207_Cluster_0123	Zm00008a003126,Zm00008a003128	PH207	Nonsyntenic	Private	NA	11.7493
PH207_Cluster_0124	Zm00008a003129,Zm00008a003130	PH207	Maize1	Shared	B73_Cluster_0971	2.59024
PH207_Cluster_0125	Zm00008a003154,Zm00008a003163,Zm00008a003168,Zm00008a003175,Zm00008a003183,Zm00008a003192,Zm00008a003198	PH207	Nonsyntenic	Private	NA	11.7159343939,2.22483796464,1.46521865961,1.0628829528,1.44096391043,1.46521865961
PH207_Cluster_0126	Zm00008a003156,Zm00008a003158,Zm00008a003160	PH207	Nonsyntenic	Shared	B73_Cluster_0973	0.00162567541538,0.00162567541538
PH207_Cluster_0127	Zm00008a003161,Zm00008a003167,Zm00008a003174,Zm00008a003181,Zm00008a003190,Zm00008a003195	PH207	Nonsyntenic	Private	B73_Cluster_0974	2.93049684763,2.93049684763,1.8860489391,2.93049684763,2.93049684763
PH207_Cluster_0128	Zm00008a003170,Zm00008a003176,Zm00008a003191,Zm00008a003197,Zm00008a003199,Zm00008a003200	PH207	Nonsyntenic	Shared	B73_Cluster_0978	9.61922576437,9.61922576437,7.20288622368,7.20288622368,7.20288622368
PH207_Cluster_0129	Zm00008a003172,Zm00008a003179,Zm00008a003188	PH207	Nonsyntenic	Shared	B73_Cluster_0976	8.00316803873,11.7170862828
PH207_Cluster_0130	Zm00008a003173,Zm00008a003180,Zm00008a003194	PH207	Nonsyntenic	Private	NA	11.7182886972,11.7182886972
PH207_Cluster_0131	Zm00008a003220,Zm00008a003221,Zm00008a003222	PH207	Maize1	Private	NA	11.7297008384,7.12837799495
PH207_Cluster_0132	Zm00008a003265,Zm00008a003266,Zm00008a003267	PH207	Maize1	Shared	B73_Cluster_0979	11.7112375796,0.915507475047
PH207_Cluster_0133	Zm00008a003303,Zm00008a003304,Zm00008a003305	PH207	Maize1	Private	NA	9.35210186784,5.60044478084
PH207_Cluster_0134	Zm00008a003306,Zm00008a003307,Zm00008a003308	PH207	Maize1	Shared	B73_Cluster_0981	9.88838752875,11.7089274252
PH207_Cluster_0135	Zm00008a003336,Zm00008a003337	PH207	Maize1	Private	NA	11.7394
PH207_Cluster_0136	Zm00008a003366,Zm00008a003367	PH207	Maize1	Private	NA	11.7305
PH207_Cluster_0137	Zm00008a003374,Zm00008a003375	PH207	Maize1	Shared	B73_Cluster_0983	11.7396
PH207_Cluster_0138	Zm00008a003480,Zm00008a003482	PH207	Maize1	Shared	B73_Cluster_0988	8.73279
PH207_Cluster_0139	Zm00008a003488,Zm00008a003489,Zm00008a003490,Zm00008a003491	PH207	Maize1	Shared	B73_Cluster_0989	0.507737064621,11.7489821869,11.7489821869
PH207_Cluster_0140	Zm00008a003544,Zm00008a003545	PH207	Maize1	Shared	B73_Cluster_0990	10.0505
PH207_Cluster_0141	Zm00008a003574,Zm00008a003575	PH207	Maize1	Shared	B73_Cluster_0992	11.7271
PH207_Cluster_0142	Zm00008a003592,Zm00008a003602	PH207	Maize1	Private	NA	11.7391
PH207_Cluster_0143	Zm00008a003595,Zm00008a003597	PH207	Maize1	Shared	B73_Cluster_0994	1.87532
PH207_Cluster_0144	Zm00008a003618,Zm00008a003630	PH207	Maize1	Shared	B73_Cluster_0997	11.724
PH207_Cluster_0145	Zm00008a003645,Zm00008a003646	PH207	Maize1	Shared	B73_Cluster_0999	3.68195
PH207_Cluster_0146	Zm00008a003650,Zm00008a003651	PH207	Nonsyntenic	NA	NA	NA
PH207_Cluster_0147	Zm00008a003678,Zm00008a003680,Zm00008a003682	PH207	Maize1	Shared	B73_Cluster_1001	11.7257171843,6.87190762594
PH207_Cluster_0148	Zm00008a003748,Zm00008a003753,Zm00008a003773	PH207	Maize1	Shared	B73_Cluster_1002	11.736327844,0.0287599292698
PH207_Cluster_0149	Zm00008a003843,Zm00008a003845	PH207	Maize1	Shared	B73_Cluster_1005	11.7287
PH207_Cluster_0150	Zm00008a003940,Zm00008a003941	PH207	Maize1	Shared	B73_Cluster_1007	11.7306
PH207_Cluster_0151	Zm00008a003986,Zm00008a003987,Zm00008a003994	PH207	Maize1	Private	NA	0.426389490555,6.33930225526
PH207_Cluster_0152	Zm00008a004010,Zm00008a004011	PH207	Maize1	Shared	B73_Cluster_1011	11.7659
PH207_Cluster_0153	Zm00008a004036,Zm00008a004038	PH207	Nonsyntenic	NA	NA	NA
PH207_Cluster_0154	Zm00008a004045,Zm00008a004046	PH207	Maize1	Private	NA	7.69665
PH207_Cluster_0155	Zm00008a004058,Zm00008a004063	PH207	Maize1	Private	NA	11.7308
PH207_Cluster_0156	Zm00008a004059,Zm00008a004064	PH207	Maize1	Shared	B73_Cluster_1013	11.7596
PH207_Cluster_0157	Zm00008a004060,Zm00008a004065	PH207	Maize1	Shared	B73_Cluster_1014	0.196098
PH207_Cluster_0158	Zm00008a004093,Zm00008a004094	PH207	Maize1	Shared	B73_Cluster_1015	8.97156
PH207_Cluster_0159	Zm00008a004108,Zm00008a004110,Zm00008a004111,Zm00008a004112,Zm00008a004113,Zm00008a004114,Zm00008a004115	PH207	Maize1	Shared	B73_Cluster_1016	3.5039916709,1.09858168856,0.651262303171,1.09858168856,1.2900870088,0.721724611693
PH207_Cluster_0160	Zm00008a004167,Zm00008a004168,Zm00008a004169	PH207	Maize1	Private	B73_Cluster_1017	0.0368980016785,1.20739988664
PH207_Cluster_0161	Zm00008a004190,Zm00008a004192	PH207	Maize1	Shared	B73_Cluster_1018	11.7371
PH207_Cluster_0162	Zm00008a004214,Zm00008a004215	PH207	Maize1	Shared	B73_Cluster_1019	8.46838
PH207_Cluster_0163	Zm00008a004216,Zm00008a004217	PH207	Maize1	Private	NA	4.80241
PH207_Cluster_0164	Zm00008a004219,Zm00008a004220	PH207	Maize1	Shared	B73_Cluster_1020	11.7258
PH207_Cluster_0165	Zm00008a004248,Zm00008a004250,Zm00008a004253	PH207	Maize1	Shared	B73_Cluster_1021	10.5210175843,10.5210175843
PH207_Cluster_0166	Zm00008a004280,Zm00008a004281	PH207	Maize1	Shared	B73_Cluster_1024	0.00536278
PH207_Cluster_0167	Zm00008a004294,Zm00008a004295,Zm00008a004296	PH207	Maize1	Shared	B73_Cluster_1026	3.01141961592,11.720953578
PH207_Cluster_0168	Zm00008a004300,Zm00008a004301,Zm00008a004302,Zm00008a004304,Zm00008a004305,Zm00008a004307	PH207	Maize1	Shared	B73_Cluster_1027	11.7179457975,11.7179457975,2.79446290853,0.501649805479,3.92624150171
PH207_Cluster_0169	Zm00008a004325,Zm00008a004326	PH207	Maize1	Private	NA	11.7539
PH207_Cluster_0170	Zm00008a004397,Zm00008a004411	PH207	Nonsyntenic	Shared	B73_Cluster_1031	8.2785
PH207_Cluster_0171	Zm00008a004427,Zm00008a004428	PH207	Nonsyntenic	NA	NA	NA
PH207_Cluster_0172	Zm00008a004437,Zm00008a004438	PH207	Maize1	Shared	B73_Cluster_1033	8.45772
PH207_Cluster_0173	Zm00008a004465,Zm00008a004466	PH207	Maize1	Shared	B73_Cluster_1035	3.23991
PH207_Cluster_0174	Zm00008a004470,Zm00008a004472,Zm00008a004473,Zm00008a004474	PH207	Nonsyntenic	Shared	B73_Cluster_1036	2.7486118938,1.43660475718,2.7486118938
PH207_Cluster_0175	Zm00008a004506,Zm00008a004510	PH207	Nonsyntenic	Private	NA	11.7244
PH207_Cluster_0176	Zm00008a004513,Zm00008a004514	PH207	Maize1	Shared	B73_Cluster_1037	11.6874
PH207_Cluster_0177	Zm00008a004517,Zm00008a004527	PH207	Maize1	Private	NA	2.83668
PH207_Cluster_0178	Zm00008a004552,Zm00008a004553	PH207	Maize1	Shared	B73_Cluster_1040	0.179224
PH207_Cluster_0179	Zm00008a004557,Zm00008a004558,Zm00008a004559,Zm00008a004560	PH207	Nonsyntenic	NA	NA	NA
PH207_Cluster_0180	Zm00008a004567,Zm00008a004568	PH207	Maize1	Shared	B73_Cluster_1042	11.7292
PH207_Cluster_0181	Zm00008a004581,Zm00008a004582	PH207	Nonsyntenic	Private	NA	11.8038
PH207_Cluster_0182	Zm00008a004601,Zm00008a004603	PH207	Maize1	Shared	B73_Cluster_1043	6.15103
PH207_Cluster_0183	Zm00008a004607,Zm00008a004608	PH207	Maize1	Shared	B73_Cluster_1045	11.731
PH207_Cluster_0184	Zm00008a004658,Zm00008a004659	PH207	Nonsyntenic	Shared	B73_Cluster_1047	4.73366
PH207_Cluster_0185	Zm00008a004660,Zm00008a004664	PH207	Maize1	Private	NA	3.37057
PH207_Cluster_0186	Zm00008a004688,Zm00008a004690	PH207	Maize1	Shared	B73_Cluster_1049	8.14567
PH207_Cluster_0187	Zm00008a004725,Zm00008a004726	PH207	Maize1	Private	NA	11.7193
PH207_Cluster_0188	Zm00008a004730,Zm00008a004732,Zm00008a004733	PH207	Maize1	Shared	B73_Cluster_1050	7.43368201077,11.737551688
PH207_Cluster_0189	Zm00008a004745,Zm00008a004746,Zm00008a004748,Zm00008a004750,Zm00008a004751,Zm00008a004754,Zm00008a004757	PH207	Maize1	Shared	B73_Cluster_1053	1.94522974149,1.67584224573,0.309273037282,1.94522974149,1.94522974149,3.17236903277
PH207_Cluster_0190	Zm00008a004747,Zm00008a004753,Zm00008a004756	PH207	Nonsyntenic	NA	NA	NA
PH207_Cluster_0191	Zm00008a004749,Zm00008a004752,Zm00008a004755,Zm00008a004758	PH207	Nonsyntenic	NA	NA	NA
PH207_Cluster_0192	Zm00008a004767,Zm00008a004768,Zm00008a004769,Zm00008a004770,Zm00008a004771	PH207	Maize1	Shared	B73_Cluster_1054	10.9860880501,1.72898274117,3.43917777746,4.98519692513
PH207_Cluster_0193	Zm00008a004791,Zm00008a004792	PH207	Maize1	Shared	B73_Cluster_1055	11.7353
PH207_Cluster_0194	Zm00008a004819,Zm00008a004820	PH207	Maize1	Shared	B73_Cluster_1056	11.7296
PH207_Cluster_0195	Zm00008a004835,Zm00008a004836	PH207	Maize1	Shared	B73_Cluster_1057	3.73361
PH207_Cluster_0196	Zm00008a004840,Zm00008a004841	PH207	Nonsyntenic	NA	NA	NA
PH207_Cluster_0197	Zm00008a004865,Zm00008a004869	PH207	Maize1	Shared	B73_Cluster_1059	11.7207
PH207_Cluster_0198	Zm00008a004895,Zm00008a004897	PH207	Maize1	Shared	B73_Cluster_1060	11.738
PH207_Cluster_0199	Zm00008a004906,Zm00008a004907	PH207	Maize1	Private	NA	0.0288071
PH207_Cluster_0200	Zm00008a004932,Zm00008a004933	PH207	Maize1	Shared	B73_Cluster_1062	5.45509
PH207_Cluster_0201	Zm00008a004965,Zm00008a004966,Zm00008a004967	PH207	Maize1	Shared	B73_Cluster_1065	11.1063144355,11.7261503529
PH207_Cluster_0202	Zm00008a004996,Zm00008a004998	PH207	Maize1	Shared	B73_Cluster_1066	11.715
PH207_Cluster_0203	Zm00008a005038,Zm00008a005039	PH207	Maize1	Shared	B73_Cluster_1067	11.7319
PH207_Cluster_0204	Zm00008a005059,Zm00008a005061	PH207	Nonsyntenic	NA	NA	NA
PH207_Cluster_0205	Zm00008a005080,Zm00008a005081	PH207	Maize1	Private	NA	11.7443
PH207_Cluster_0206	Zm00008a005086,Zm00008a005087,Zm00008a005088	PH207	Maize1	Shared	B73_Cluster_1069	7.71613802426,11.7347663729
PH207_Cluster_0207	Zm00008a005172,Zm00008a005173	PH207	Maize1	Shared	B73_Cluster_1072	11.7134
PH207_Cluster_0208	Zm00008a005184,Zm00008a005185	PH207	Maize1	Shared	B73_Cluster_1073	2.7717
PH207_Cluster_0209	Zm00008a005193,Zm00008a005194	PH207	Maize1	Private	NA	11.7842
PH207_Cluster_0210	Zm00008a005201,Zm00008a005210	PH207	Nonsyntenic	Private	NA	11.7806
PH207_Cluster_0211	Zm00008a005209,Zm00008a005211	PH207	Nonsyntenic	Shared	B73_Cluster_1074	11.7194
PH207_Cluster_0212	Zm00008a005228,Zm00008a005229	PH207	Maize1	Shared	B73_Cluster_1076	1.65431
PH207_Cluster_0213	Zm00008a005236,Zm00008a005237,Zm00008a005238	PH207	Maize1	Shared	B73_Cluster_1077	11.7199214067,2.13647583903
PH207_Cluster_0214	Zm00008a005253,Zm00008a005254,Zm00008a005257,Zm00008a005259,Zm00008a005272	PH207	Maize1	Shared	B73_Cluster_1078	0.219026287084,11.7146559023,11.7146559023,9.48966633527
PH207_Cluster_0215	Zm00008a005274,Zm00008a005283	PH207	Maize1	Shared	B73_Cluster_1079	11.7324
PH207_Cluster_0216	Zm00008a005276,Zm00008a005278	PH207	Maize1	Shared	B73_Cluster_1080	4.98651
PH207_Cluster_0217	Zm00008a005301,Zm00008a005303,Zm00008a005304	PH207	Maize1	Shared	B73_Cluster_1081	11.7430606317,11.7430606317
PH207_Cluster_0218	Zm00008a005302,Zm00008a005305	PH207	Maize1	Private	NA	6.35918
PH207_Cluster_0219	Zm00008a005422,Zm00008a005424	PH207	Maize1	Shared	B73_Cluster_1090	11.7265
PH207_Cluster_0220	Zm00008a005431,Zm00008a005433,Zm00008a005434	PH207	Maize1	Shared	B73_Cluster_1091	7.13553181151,11.7161874572
PH207_Cluster_0221	Zm00008a005453,Zm00008a005454,Zm00008a005455	PH207	Maize1	Private	B73_Cluster_1092	0.0128220149803,0.0128220149803
PH207_Cluster_0222	Zm00008a005456,Zm00008a005457,Zm00008a005458	PH207	Maize1	Shared	B73_Cluster_1093	2.68796260741,11.7342630157
PH207_Cluster_0223	Zm00008a005466,Zm00008a005467	PH207	Maize1	Shared	B73_Cluster_1094	11.7159
PH207_Cluster_0224	Zm00008a005480,Zm00008a005482	PH207	Maize1	Shared	B73_Cluster_1096	0.611895
PH207_Cluster_0225	Zm00008a005483,Zm00008a005484	PH207	Maize1	Shared	B73_Cluster_1098	11.7285
PH207_Cluster_0226	Zm00008a005540,Zm00008a005541	PH207	Maize1	Shared	B73_Cluster_1101	9.60003
PH207_Cluster_0227	Zm00008a005553,Zm00008a005555	PH207	Nonsyntenic	Shared	B73_Cluster_1102	11.7278
PH207_Cluster_0228	Zm00008a005561,Zm00008a005562,Zm00008a005568	PH207	Maize1	Private	NA	2.2354493272,10.1581974722
PH207_Cluster_0229	Zm00008a005637,Zm00008a005638	PH207	Maize1	Shared	B73_Cluster_1106	11.7297
PH207_Cluster_0230	Zm00008a005645,Zm00008a005655	PH207	Maize1	Private	NA	11.7272
PH207_Cluster_0231	Zm00008a005666,Zm00008a005667	PH207	Nonsyntenic	NA	NA	NA
PH207_Cluster_0232	Zm00008a005688,Zm00008a005690	PH207	Nonsyntenic	NA	NA	NA
PH207_Cluster_0233	Zm00008a005719,Zm00008a005720	PH207	Maize1	Shared	B73_Cluster_1113	11.7191
PH207_Cluster_0234	Zm00008a005742,Zm00008a005746	PH207	Maize1	Shared	B73_Cluster_1114	4.44181
PH207_Cluster_0235	Zm00008a005837,Zm00008a005838	PH207	Nonsyntenic	NA	NA	NA
PH207_Cluster_0236	Zm00008a005847,Zm00008a005851	PH207	Maize1	Shared	B73_Cluster_1116	11.7302
PH207_Cluster_0237	Zm00008a005883,Zm00008a005884	PH207	Maize1	Shared	B73_Cluster_1117	7.49849
PH207_Cluster_0238	Zm00008a005957,Zm00008a005960	PH207	Maize1	Private	NA	11.8064
PH207_Cluster_0239	Zm00008a005990,Zm00008a005991	PH207	Maize1	Shared	B73_Cluster_0012	11.7372
[truncated: 1,227 more rows]
